# Supplementary material for: Associations of disaster-related and psychosocial factors with changes in smoking status after a disaster: a cross-sectional survey after the Great East Japan Earthquake
Source: PubMed Central journal article supplement — BMJ Open. 2018 Jun 30;8(6):e018943. doi: 10.1136/bmjopen-2017-018943 (PMC6135429; doi:10.1136/bmjopen-2017-018943), 2018-06-30
Supplement: bmjopen-2017-018943.draft_revisions.pdf [file bmjopen-2017-018943.draft_revisions.pdf]

# BMJ Open

BMJ Open is committed to open peer review. As part of this commitment we make the peer review history of every article we publish publicly available.

When an article is published we post the peer reviewers' comments and the authors' responses online. We also post the versions of the paper that were used during peer review. These are the versions that the peer review comments apply to.

The versions of the paper that follow are the versions that were submitted during the peer review process. They are not the versions of record or the final published versions. They should not be cited or distributed as the published version of this manuscript.

BMJ Open is an open access journal and the full, final, typeset and author-corrected version of record of the manuscript is available on our site with no access controls, subscription charges or pay-per-view fees (<http://bmjopen.bmj.com>).

If you have any questions on BMJ Open's open peer review process please email [info.bmjopen@bmj.com](mailto:info.bmjopen@bmj.com)

# BMJ Open

## Changes in smoking status and their associations with disaster-related and psychosocial factors before and after a disaster: A survey in the evacuation area of Fukushima after the Great East Japan Earthquake, The Fukushima Health Management Survey

|                                 |                                                                                                                                                                                                                                                                                                                                                                                                                                                                                                                                                                                                                                                                                                                                                                                                                                                                                                                                                                                                                                                                                                                                                                                                                                                                                                                                                                                                                                                                                                                                                                                                                                                                                                                                                                                                                                                                                                                                                                                                               |
|---------------------------------|---------------------------------------------------------------------------------------------------------------------------------------------------------------------------------------------------------------------------------------------------------------------------------------------------------------------------------------------------------------------------------------------------------------------------------------------------------------------------------------------------------------------------------------------------------------------------------------------------------------------------------------------------------------------------------------------------------------------------------------------------------------------------------------------------------------------------------------------------------------------------------------------------------------------------------------------------------------------------------------------------------------------------------------------------------------------------------------------------------------------------------------------------------------------------------------------------------------------------------------------------------------------------------------------------------------------------------------------------------------------------------------------------------------------------------------------------------------------------------------------------------------------------------------------------------------------------------------------------------------------------------------------------------------------------------------------------------------------------------------------------------------------------------------------------------------------------------------------------------------------------------------------------------------------------------------------------------------------------------------------------------------|
| Journal:                        | <i>BMJ Open</i>                                                                                                                                                                                                                                                                                                                                                                                                                                                                                                                                                                                                                                                                                                                                                                                                                                                                                                                                                                                                                                                                                                                                                                                                                                                                                                                                                                                                                                                                                                                                                                                                                                                                                                                                                                                                                                                                                                                                                                                               |
| Manuscript ID                   | bmjopen-2017-018943                                                                                                                                                                                                                                                                                                                                                                                                                                                                                                                                                                                                                                                                                                                                                                                                                                                                                                                                                                                                                                                                                                                                                                                                                                                                                                                                                                                                                                                                                                                                                                                                                                                                                                                                                                                                                                                                                                                                                                                           |
| Article Type:                   | Research                                                                                                                                                                                                                                                                                                                                                                                                                                                                                                                                                                                                                                                                                                                                                                                                                                                                                                                                                                                                                                                                                                                                                                                                                                                                                                                                                                                                                                                                                                                                                                                                                                                                                                                                                                                                                                                                                                                                                                                                      |
| Date Submitted by the Author:   | 02-Aug-2017                                                                                                                                                                                                                                                                                                                                                                                                                                                                                                                                                                                                                                                                                                                                                                                                                                                                                                                                                                                                                                                                                                                                                                                                                                                                                                                                                                                                                                                                                                                                                                                                                                                                                                                                                                                                                                                                                                                                                                                                   |
| Complete List of Authors:       | Nakano, Hironori ; Fukushima Medical University, Radiation Medical Science Center for the Fukushima Health Management Survey; Fukushima Medical University School of Medicine, Epidemiology<br>Ohira, Tetsuya; Fukushima Medical University, Department of Epidemiology; Fukushima Medical University School of Medicine, Radiation Medical Center for Fukushima Health Management Survey<br>Maeda, Masaharu ; Fukushima Medical University, Radiation Medical Science Center for the Fukushima Health Management Survey; Fukushima Medical University School of Medicine, Disaster Psychiatry<br>Yabe, Hirooki; Fukushima Medical University School of Medicine, Neuropsychiatry; Radiation Medical Science Center for the Fukushima Health Management Survey<br>Ohtsuru, Akira; Fukushima Medical University,<br>Suzuki, Yuriko; National Institute of Mental Health, National Center of Neurology and Psychiatry,<br>Harigane, Mayumi; Radiation Medical Science Center for the Fukushima Health Management Survey<br>Horikoshi, Naoko; Radiation Medical Science Center for the Fukushima Health Management Survey,<br>Nagai, Masato; Tohoku University Graduate School of Medicine, Division of Epidemiology, Department of Public Health and Forensic Medicine; Shiga University of Medical Science, Department of Health Science,<br>Zhang, Wen; Fukushima Medical University School of Medicine, Epidemiology<br>Takahashi, Hideto; Fukushima Medical University School of Medicine, Office of Information Management and Statistics, Radiation Medical Science Center for the Fukushima Health Management Survey, Faculty of Medicine, ; Fukushima Medical University School of Medicine, Radiation Medical Science Center for the Fukushima Health Management Survey<br>Yasumura, Seiji; Fukushima Medical University<br>Iso, Hiroyasu; Osaka University Graduate School of Medicine, Public Health, Department of Social and Environmental Medicine<br>Kamiya, Kenji; Fukushima Medical University |
| <b>Primary Subject Heading</b>: | Smoking and tobacco                                                                                                                                                                                                                                                                                                                                                                                                                                                                                                                                                                                                                                                                                                                                                                                                                                                                                                                                                                                                                                                                                                                                                                                                                                                                                                                                                                                                                                                                                                                                                                                                                                                                                                                                                                                                                                                                                                                                                                                           |
| Secondary Subject Heading:      | Epidemiology, Public health, Mental health                                                                                                                                                                                                                                                                                                                                                                                                                                                                                                                                                                                                                                                                                                                                                                                                                                                                                                                                                                                                                                                                                                                                                                                                                                                                                                                                                                                                                                                                                                                                                                                                                                                                                                                                                                                                                                                                                                                                                                    |

1  
2  
3  
4  
5  
6  
7  
8  
9  
10  
11  
12  
13  
14  
15  
16  
17  
18  
19  
20  
21  
22  
23  
24  
25  
26  
27  
28  
29  
30  
31  
32  
33  
34  
35  
36  
37  
38  
39  
40  
41  
42  
43  
44  
45  
46  
47  
48  
49  
50  
51  
52  
53  
54  
55  
56  
57  
58  
59  
60

|           |                                                               |
|-----------|---------------------------------------------------------------|
| Keywords: | Socioeconomic status, Priority/special populations, Cessation |
|           |                                                               |

SCHOLARONE™  
Manuscripts

For peer review only

1  
2  
3  
4  
5  
6 **Effects of disaster-related and psychosocial factors on changes in smoking status**  
7  
8 **after a disaster: A cross-sectional survey in the evacuation area of Fukushima after**  
9  
10 **the Great East Japan Earthquake**  
11  
12  
13  
14  
15  
16

17 **Author names and affiliations.**

18 Hironori NAKANO <sup>1,2,\*</sup>, Tetsuya OHIRA <sup>1,2</sup>, Masaharu MAEDA <sup>2,3</sup>, Hirooki YABE <sup>4</sup>,  
19 Akira OTSURU <sup>6</sup>, Yuriko SUZUKI <sup>5</sup>, Mayumi HARIGANE <sup>2</sup>, Naoko HORIKOSHI <sup>2</sup>,  
20 Masato NAGAI <sup>1,2, 9, 10</sup>, Wen ZHANG <sup>1</sup>, Hideto TAKAHASHI <sup>2</sup>, Seiji YASUMURA <sup>7</sup>,  
21 Hiroyasu ISO <sup>8</sup>, Kenji KAMIYA <sup>2</sup>  
22  
23  
24  
25  
26  
27

28 Hironori NAKANO, e-mail: h-nakano@fmu.ac.jp

29 Tetsuya OHIRA, e-mail: teohira@fmu.ac.jp

30 Masaharu MAEDA, e-mail: masagen@fmu.ac.jp

31 Hirooki YABE, e-mail: hyabe@fmu.ac.jp

32 Akira OTSURU, e-mail: ohtsuru@fmu.ac.jp

33 Yuriko SUZUKI, e-mail: yrsuzuki@ncnp.go.jp

34 Mayumi HARIGANE, e-mail: harigane@fmu.ac.jp

35 Naoko HORIKOSHI, e-mail: copepe@fmu.ac.jp

36 Masato NAGAI, e-mail: m-nagai@med.tohoku.ac.jp

37 WEN Zhang, e-mail: zhangw09@fmu.ac.jp

38 Hideto TAKAHASHI, e-mail: htaka@fmu.ac.jp

39 Seiji YASUMURA, e-mail: yasumura@fmu.ac.jp

40 Hiroyasu ISO, e-mail: iso@pbhel.med.osaka-u.ac.jp

41 Kenji KAMIYA, e-mail: kkamiya@fmu.ac.jp

42  
43  
44  
45  
46  
47  
48  
49  
50  
51  
52  
53  
54 **Corresponding author.**  
55  
56  
57  
58  
59  
60

1  
2  
3  
4  
5  
6  
7  
8  
9  
10  
11  
12  
13  
14  
15  
16  
17  
18  
19  
20  
21  
22  
23  
24  
25  
26  
27  
28  
29  
30  
31  
32  
33  
34  
35  
36  
37  
38  
39  
40  
41  
42  
43  
44  
45  
46  
47  
48  
49  
50  
51  
52  
53  
54  
55  
56  
57  
58  
59  
60

Hironori NAKANO

Radiation Medical Science Center for the Fukushima health management survey,

Fukushima Medical University, 1 Higariga-oka, Fukushima City 960-1295, JAPAN

Phone: +81-24-547-1343; Fax: +81-24-547-1336

E-mail: h-nakano@fmu.ac.jp

For peer review only

## Abstract

**Objective:** To examine changes in smoking status and the related factors among the residents of the evacuation area in Fukushima after the Great East Japan Earthquake.

**Methods:** The subjects were 58,755 men and women of minimum age 20 years and who participated in the Fukushima Health Management Survey in 2012 after the disaster. The subjects were divided into four groups: 1) non-smokers before and after the disaster, 2) non-smokers before and smokers after the disaster, 3) smokers before and non-smokers after the disaster and 4) smokers before and after the disaster. Multivariate-adjusted odds ratios (ORs) and 95% confidence intervals (CIs) of changes in smoking status for disaster-related and psychosocial factors were tested by logistic regression analysis, stratified by smoking status before the disaster.

**Results:** Among 44,729 non-smokers before the disaster, 634 (1.4%) started smoking after the disaster. Among 14,025 smokers before the disaster, 1,564 (11.1%) quit smoking after the disaster. The multivariable-adjusted ORs (95% CIs) for the group that started smoking were 3.01 (2.55–3.55) for men, 0.69 (0.58–0.84) for higher educational attainment, 1.31 (1.10–1.56) for living in a rental housing/apartment, 1.24 (1.01–1.52) for house damaged, 1.45 (1.09–1.92) for history of mental illness, 1.29 (1.07–1.56) for experienced tsunami, 1.21 (1.01–1.46) for becoming unemployed, 1.67 (1.35–2.08) for

1  
2  
3  
4  
5  
6 presence of traumatic symptoms and 1.38 (1.09–1.74) for non-specific mental illness.

7  
8  
9 The adjusted ORs (95% CIs) for the group that quit smoking were 0.64 (0.57–0.72) for  
10  
11 men, 1.31 (1.16–1.48) for higher education and 0.86 (0.76–0.98) for decreased income.

12  
13  
14 **Conclusion:** The proportion of smokers decreased slightly among residents in the  
15  
16 evacuation area, and the quitting of smoking after the disaster was associated with  
17  
18 disaster-related and psychosocial factors, especially living conditions, job status,  
19  
20 experiences during the disaster and presence of traumatic symptoms and history of  
21  
22 mental illness.  
23  
24  
25  
26  
27  
28  
29  
30

### 31 **Strengths and limitations of this study**

32  
33  
34 • The strengths of this study lie in the sample size and procedures, as it involved a  
35  
36 large-scale survey (n = 58,755) to complete an inventory-based analysis of evacuees  
37  
38 following the earthquake.  
39  
40

41  
42 • Smoking status before and after the earthquake was investigated using a  
43  
44 self-reported questionnaire after the disaster, and the number of cigarettes used among  
45  
46 current smokers was not evaluated.  
47  
48  
49

50  
51 • This study had an overall low response rate (40.7%); therefore, the  
52  
53 representativeness of the target population is uncertain.  
54  
55  
56  
57  
58  
59  
60

1  
2  
3  
4  
5  
6 **Keywords**  
7

8 Disaster, Smoking cessation, Socioeconomic status, Population-based, Psychological  
9 stress.  
10  
11  
12  
13  
14  
15  
16  
17  
18  
19  
20  
21  
22  
23  
24  
25  
26  
27  
28  
29  
30  
31  
32  
33  
34  
35  
36  
37  
38  
39  
40  
41  
42  
43  
44  
45  
46  
47  
48  
49  
50  
51  
52  
53  
54  
55  
56  
57  
58  
59  
60



## Introduction

The Great East Japan Earthquake that occurred on 11 March 2011 was one of the most disastrous events in the history of Japan. About 212,500 people in the Fukushima Prefecture were forced to evacuate due to the Fukushima Dai-ichi nuclear power plant accident following the earthquake and the subsequent tsunami that struck the plant. Six years after the disaster, 77,283 have still been evacuated as of March 2017.

The accident resulted in the disruption of normal lives of the people of Fukushima, loss of life, relocations, maladjustment to new circumstances and induced stressful situations for the evacuees.<sup>1-3</sup> A previous study reported that cumulative mental stress is partly associated with an increased risk of smoking due to increased impulsivity.<sup>4</sup> Furthermore, post-traumatic stress disorder (PTSD) might be associated with an increased risk of smoking.<sup>5</sup> Moreover, most previous studies reported that the proportion of smokers increased subsequent to disasters, such as Hurricane Katrina<sup>7</sup>, earthquakes<sup>8-9</sup> and the September 11 terrorist attacks in New York City<sup>5,10</sup>, while some studies did not support this view.<sup>6</sup> All previous studies, however, had adopted a limited sample size (n = 209–988) and did not examine the change in smoking status in individuals and the related factors. Therefore, a comprehensive examination with a large sample size would be necessary to determine the impact of smoking status post

1  
2  
3  
4  
5  
6 disasters.

7  
8       Among the evacuees in the Fukushima Prefecture, the proportion of overweight  
9  
10 persons and the prevalence of hypertension, diabetes mellitus, dyslipidemia,  
11  
12 polycythemia and atrial fibrillation increased one year after the nuclear power plant  
13  
14 accident.<sup>11-14</sup> Therefore, the evacuees are expected to be at a greater risk of  
15  
16 cardiovascular diseases if the proportion of current smoking increases, because smoking  
17  
18 is a major risk factor for cardiovascular diseases.  
19  
20  
21  
22  
23

24  
25       Hence, we aim to examine the smoking status after the Fukushima Dai-ichi nuclear  
26  
27 power plant accident among more than 100,000 people in the evacuation area of the  
28  
29 Fukushima prefecture. The prevalence of severe degree of traumatic symptoms,  
30  
31 psychological distress and anxiety after the nuclear accident are high among the  
32  
33 residents of the evacuation area<sup>3</sup>. Hence, we also aim to examine the potential effects of  
34  
35 disaster-related and psychosocial factors on changes in smoking status.  
36  
37  
38  
39  
40  
41  
42  
43  
44

## 45 **Methods**

### 46 **Participants**

47  
48 Following the Great East Japan Earthquake that occurred on 11 March 11 2011, the  
49  
50 government designated evacuation instruction zones. Between January and October  
51  
52  
53  
54  
55  
56  
57  
58  
59  
60

1  
2  
3  
4  
5  
6 2012, the evacuees participated in the Fukushima Health Management Survey of the  
7  
8 Fukushima Dai-ichi Nuclear Power Plant Accident that started in 2011. The 'Mental  
9  
10 Health and Lifestyle Survey', part of that longitudinal study, assesses how the disaster  
11  
12 and subsequent lifestyle of people affect the mental status of the evacuees over a long  
13  
14 period<sup>1,3</sup>.  
15  
16  
17  
18  
19

20 The target population of the survey was men and women aged minimum 15 years  
21  
22 and living in the evacuation zones specified by the government. These zones included  
23  
24 Hirono Town, Naraha Town, Tomioka Town, Kawauchi Village, Okuma Town, Futaba  
25  
26 Town, Namie Town, Katsurao Village, Minamisoma City, Tamura City, Kawamata  
27  
28 Town, Iitate Village and a part of Date City. The questionnaire was mailed on 18  
29  
30  
31 January 2012 to persons who had a certificate of residence in the evacuation area as on  
32  
33  
34 11 March 2011. The number of residents who were born before 1 April 1995 (i.e. high  
35  
36 school students or older) during the disaster was 180,604. The response rate for the  
37  
38 participation was 40.7% (n = 73,569).  
39  
40  
41  
42  
43  
44

45 Since we sought to examine changes in smoking behaviour among the evacuees, we  
46  
47 limited our data to men and women aged minimum 20 years, which is the legal smoking  
48  
49 age. As a result, we used 58,754 subjects for the analysis. This survey was approved by  
50  
51 the ethics review committee of the Fukushima Medical University (No. 1316).  
52  
53  
54  
55  
56  
57  
58  
59  
60

### **Smoking status**

In the questionnaire, the smoking status was determined by current smokers or current non-smokers just before the disaster; however, we did not distinguish people who never smoked or ex-smokers from current non-smokers. The smoking status 1-year after the disaster was determined by never smoked, ex-smokers and current smokers. Then, the changes in the smoking status before and after the disaster were categorized into four groups: 1) non-smokers before and after the disaster (non-smoking–non-smoking), 2) non-smokers before and smokers after the disaster (non-smoking–smoking), 3) smokers before and non-smokers after the disaster (smoking–non-smoking) and 4) smokers before and after the disaster (smoking–smoking).

### **Socioeconomic and disaster-related and psychosocial variables**

Socioeconomic and disaster-related variables were assessed using the questionnaire responses, including living arrangements (own home, evacuation shelter, temporary housing, rental housing or apartment and relative's home), whether experienced living in evacuation shelters (yes or no), education level (elementary school, junior high school and high school, vocational college, junior college, university (4 years) and graduate

1  
2  
3  
4  
5  
6 school), history of mental illness (yes or no), whether becoming unemployed (yes or no),  
7  
8 whether income decreased (yes or no), whether house was damaged (yes or no),  
9  
10 whether experienced tsunami before (yes or no), presence of traumatic symptoms  
11  
12 assessed by PTSD Checklist-Stressor Specific Version [PCL-S] and non-specific  
13  
14 psychological distress measured by the Japanese version of the Kessler Psychological  
15  
16 Distress Scale.  
17  
18  
19  
20  
21

22  
23 We considered PCL-S score  $> 44$  as indicating the presence of traumatic  
24  
25 symptoms.<sup>15-17</sup> We regarded Kessler's K6 score  $\geq 13$  as indicating the presence of  
26  
27 non-specific psychological distress.<sup>18-23</sup> Age was used as a categorical variable, defining  
28  
29 three age groups (20-49, 50-64 and  $\geq 65$  years). Education level was categorized as  
30  
31 lower (high school or less) or higher (additional vocational college or junior college  
32  
33 experience or higher).  
34  
35  
36  
37  
38  
39  
40  
41  
42

### 43 **Statistical analysis**

44  
45 The chi-square test was used to compare the smoking status before and after the disaster.  
46  
47  
48 Disaster-related and socioeconomic variables were also compared among the categories  
49  
50 of change in the smoking status before and after the disaster using the chi-squared test.  
51  
52  
53  
54 We examined the impact of disaster-related and psychosocial variables on starting  
55  
56  
57  
58  
59  
60

1  
2  
3  
4  
5  
6 smoking compared with continued non-smoking after the disaster among non-smokers  
7  
8 before the disaster. We also examined the impact of these variables on quitting smoking  
9  
10 compared with continued smoking among smokers before the disaster.  
11  
12

13  
14 Age- and sex-adjusted odds ratios (ORs) and 95% confidence intervals (CIs) of the  
15  
16 changes in smoking status for disaster-related and psychosocial variables were  
17  
18 calculated by logistic regression analysis. We further adjusted for age, sex, living  
19  
20 arrangement, experienced living in evacuation shelters, education level, history of  
21  
22 mental illness, whether becoming unemployed, whether income decreased, whether  
23  
24 house was damaged, whether experienced tsunami and presence of traumatic symptoms  
25  
26 and non-specific psychological distress. We also concluded sex-specific analysis.  
27  
28  
29  
30  
31  
32  
33  
34 P-values were obtained by a two-tailed test and  $P < 0.05$  was regarded as statistically  
35  
36 significant. All statistical analyses were conducted with software package SAS version  
37  
38  
39  
40 9.4 (SAS Institute Inc., Cary, NC, USA).  
41  
42  
43  
44

## 45 **Results**

46  
47  
48 The proportion of current smokers among a total of 58,754 men and women  
49  
50 significantly decreased from 23.9% to 22.3% after the disaster ( $P < 0.001$ ). The  
51  
52  
53 corresponding proportion among men changed from 37.5% to 35.2% ( $P < 0.001$ ) and  
54  
55  
56  
57  
58  
59  
60

1  
2  
3  
4  
5  
6 that among women changed from 12.5% to 11.5% ( $P < 0.001$ ). Among the participants,  
7  
8 634 (1.1%) men and women started smoking and 1,564 (2.7%) men and women quit  
9  
10 smoking after the disaster. The corresponding proportions of starting and quitting  
11  
12 smoking were, respectively, 1.4% and 3.7% for men and 0.8% and 1.8% for women.  
13  
14  
15

16  
17 Table 1 shows the participants' geographical, disaster-related and psychosocial  
18  
19 variables according to the categories of changes in smoking status, i.e. according to the  
20  
21 continued non-smoking or continued smoking group. The non-smoking–smoking group  
22  
23 showed higher proportion than the non-smoking–non-smoking group among the  
24  
25 following categories: men, younger ages, rental house/apartment, shelter living, house  
26  
27 damage, history of mental illness, experience of tsunami, becoming unemployed,  
28  
29 decreased income, traumatic symptoms and non-specific psychological distress.  
30  
31  
32  
33  
34  
35

36  
37 Compared with the smoking–smoking group, the smoking–non-smoking group  
38  
39 showed a higher proportion among the categories of women, older ages, higher  
40  
41 education, history of mental illness, experience of tsunami and becoming unemployed,  
42  
43 and a lower proportion among the categories of shelter living, decreased income,  
44  
45  
46  
47  
48  
49 traumatic symptoms and non-specific psychological distress.  
50

51 Table 2 shows age- and sex-adjusted and multivariable-adjusted ORs and 95% CIs  
52  
53  
54 for the group that started smoking after the disaster according to geographical,  
55  
56  
57  
58  
59

1  
2  
3  
4  
5  
6 disaster-related and psychosocial factors among 44,729 non-smokers before the disaster.  
7  
8 The corresponding multivariable-adjusted ORs (95% CIs) were 3.01 (2.55–3.55) for  
9  
10  
11 men, 0.32 (0.26–0.39) for ages 50–64 years, 0.17 (0.14–0.22) for ages  $\geq 65$  years, 0.69  
12  
13 (0.58–0.84) for higher education (junior college and higher), 1.31 (1.10–1.56) for living  
14  
15 in a rental housing/apartment, 1.24 (1.01–1.52) for house damaged, 1.45 (1.09–1.92) for  
16  
17 history of mental illness, 1.29 (1.07–1.56) for experience of tsunami, 1.21 (1.01–1.46)  
18  
19 for becoming unemployed, 1.67(1.35–2.08) for presence of traumatic symptoms and  
20  
21  
22  
23  
24  
25  
26  
27 1.38 (1.09–1.74) for presence of non-specific mental illness.

28  
29  
30  
31  
32  
33  
34  
35  
36  
37  
38  
39  
40  
41  
42  
43  
44  
45  
46  
47  
48  
49  
50  
51  
52  
53  
54  
55  
56  
57  
58  
59  
60  
Table 3 indicates age- and sex-adjusted and multivariable-adjusted ORs and 95%  
CIs for the group that quit smoking after the disaster according to geographical,  
disaster-related and psychosocial factors among 14,025 smokers before the disaster. The  
corresponding multivariable-adjusted ORs (95% CIs) were 0.64 (0.57–0.72) for men,  
1.89 (1.62–2.19) for  $\geq 65$  years, 1.31 (1.16–1.48) for higher education and 0.86  
(0.76–0.98) for decreased income.

Since the proportion of current smokers was higher among men than women in  
Japan, we repeated the analysis according to sex; the results remained the same as the  
previous results (not shown in table).



## Discussion

One of the main findings from the present study is that 10 months after the March 2011 earthquake and the subsequent disastrous tsunami and nuclear power plant accident, the proportion of smokers decreased slightly among men and women aged  $\geq 20$  years in the evacuation area. The proportion of persons who quit smoking was higher than that of those who started smoking: 3.7% and 1.4% among men and 1.8% and 0.8% among women, respectively. Previous studies, however, reported that the proportion of current smokers increases after a disaster.<sup>7-10</sup>

In addition, the present study found that becoming unemployed, house being damaged, having experience of tsunami, presence of traumatic symptoms and non-specific psychological distress as well as being a male or younger, staying in a rental house/apartment or having a lower education was associated with increased risk of starting smoking. Factors associated with quitting smoking were being a female or older, having a higher education or stable income. Therefore, to prevent people from starting smoking after a disaster, effective management of traumatic symptoms and non-specific psychological distress may be required.

The National Health Nutrition Survey reported that there was no change in the proportions of smokers in Japan before and after the disaster: 19.5% in 2010 and 20.7%

1  
2  
3  
4  
5  
6 in 2012.<sup>24</sup> A reason for the slight decrease in the proportion of current smokers after the  
7  
8 disaster may be the decreased access to tobacco products, because the earthquake  
9  
10 resulted in the damage of tobacco plantations, ceasing of tobacco production and  
11  
12 disruption of railway and road transportation networks. The tobacco distribution  
13  
14 stagnated after the disaster. According to a press release by Japan Tobacco Inc, the total  
15  
16 cigarette sales volume in April 2011 decreased by 81.8% compared to April 2010 and  
17  
18 domestic cigarette sales decreased by 74.8%. Furthermore, the cigarette sales volume  
19  
20 between April and September 2011 decreased by 41.2% and the tobacco sales volume  
21  
22 decreased by 20.4% compared to the same period the previous year.<sup>25</sup> These situations  
23  
24 probably attributed to the smokers quitting smoking after the disaster.  
25  
26  
27  
28  
29  
30  
31  
32  
33

34 Although the proportion of current smokers decreased slightly among the evacuees  
35  
36 after the disaster, the proportion of current smokers was still higher in the evacuation  
37  
38 area than in other areas of Japan. In the present study, the proportion of current smokers  
39  
40 was 22.3% (35.2% men and 11.5% women), while the corresponding proportion in the  
41  
42 national sample was 20.1% (32.4% men and 9.7% women) in 2011.<sup>26</sup>  
43  
44  
45  
46  
47

48 The strengths of this survey lie in its size and procedures, as it involved a  
49  
50 large-scale survey to complete an inventory-based analysis of evacuees following the  
51  
52 earthquake. The present study has certain limitations. First, we investigated smoking  
53  
54  
55  
56  
57  
58  
59  
60

1  
2  
3  
4  
5  
6 status before and after the earthquake using a self-reported questionnaire administered  
7  
8  
9 after the disaster. We did not evaluate the number of cigarettes among current smokers.  
10  
11  
12 Second, because the response rate to the present study was relatively low (41%),  
13  
14  
15 representativeness of the target populations is uncertain, and this may affect the results.  
16

17 In conclusion, the proportion of smokers among evacuees in the Fukushima  
18  
19  
20 prefecture decreased slightly after the disaster. The changes in smoking status after the  
21  
22  
23 disaster were associated with disaster-related psychosocial factors, especially living  
24  
25  
26 conditions, becoming employed, experiences during the disaster and presence of  
27  
28  
29 traumatic symptoms and history of mental illness. Because the results of our study may  
30  
31  
32 show short-term changes in smoking status after the disaster, a long-term follow-up  
33  
34  
35 study is needed to examine the effects of the disaster-related factors on smoking status  
36  
37  
38 among evacuees.  
39  
40  
41  
42  
43  
44  
45  
46  
47  
48  
49  
50  
51  
52  
53  
54  
55  
56  
57  
58  
59  
60

### Author affiliations

1 Department of Epidemiology, Fukushima Medical University, 1 Hikariga-oka,  
Fukushima City 960-1295, JAPAN

2 Radiation Medical Science Center for the Fukushima Health Management Survey,  
Fukushima Medical University, 1 Hikariga-oka, Fukushima City 960-1295, JAPAN

3 Department of Disaster Psychiatry, Fukushima Medical University, 1 Hikariga-oka,  
Fukushima City 960-1295, JAPAN

4 Department of Neuropsychiatry, Fukushima Medical University, 1 Hikariga-oka,  
Fukushima City 960-1295, JAPAN

5 National Institute of Mental Health: National Center of Neurology and Psychiatry,  
4-1-1 Ogawa-Higashi, Kodaira, Tokyo 187-8551, JAPAN

6 Department of Radiation Health Management, Fukushima Medical University, 1  
Hikariga-oka, Fukushima City 960-1295, JAPAN

7 Department of Public Health, Fukushima Medical University, 1 Hikariga-oka,  
Fukushima City 960-1295, JAPAN

8 Public Health, Graduate School of Medicine Osaka University, 2-2 Yamadaoka, Suita,  
Osaka 565-0871, JAPAN

9 Tohoku Medical Megabank Organization, Tohoku University, 2-1 Seiryomachi,  
Aoba-ku, Sendai, 980-8573, JAPAN

10 Graduate School of Medicine, Tohoku University, Sendai, 2-1 Seiryomachi,  
Aoba-ku, Sendai, 980-8573, JAPAN

### Acknowledgements

The authors would like to express their sincere appreciation for the support extended to them by the chairpersons, expert committee members, advisors and staff of the Fukushima Health Management Survey Group.

**Contributors**

TO, SY, AO, MM, MH, NH, YS, HY and HT were responsible for data collection and overseeing study procedures. HN, TO and HI contributed to the design of the present study. HN conducted the analysis and prepared the manuscript. TO, SY, AO, MM, MH, NH, YS, HY, HT, MN, WZ, HI and KK made significant contributions to the critical interpretation of the results in terms of important practical content. All the authors read and approved the final version of the manuscript.

**Competing interests**

None declared

**Funding**

This survey was conducted as part of Fukushima Prefecture's post-disaster recovery plans and was supported by the "National Health Fund for Children and Adults Affected by the Nuclear Incident".

**Data sharing statement**

No additional data are available.

## References

1. Yasumura S , Hosoya M , Yamashita S , Kamiya K , Abe M , Akashi M , et al. Study protocol for the Fukushima Health Management Survey. *J Epidemiol.* 2012;22, 375-383.
2. Situation of the evacuation area and support for the victims in Fukushima. [cited 2017 May]. Available from: <http://www.pref.fukushima.lg.jp/site/portal/list271.html>. (accessed 31 May 2017)
3. Yabe H , Suzuki Y , Mashiko H , Nakayama Y , Hisata M , Niwa S , et al. Psychological distress after the Great East Japan Earthquake and Fukushima Daiichi Nuclear Power Plant accident: results of a mental health and lifestyle survey through the Fukushima Health Management Survey in FY2011 and FY2012. *Fukushima J Med Sci.* 2014;60, 57-67.
4. Ansell EB , Gu P , Tuit K , Sinha R. Effects of cumulative stress and impulsivity on smoking status. *Human Psychopharmacology.* 2012;27, 200-208.
5. Vlahov D , Galea S , Resnick H , Ahern J , Boscarino JA , Bucuvalas M , et al. Increased use of cigarettes, alcohol, and marijuana among Manhattan, New York, residents after the September 11th terrorist attacks. *Am J Epidemiol.* 2002;155, 988-996.

- 1  
2  
3  
4  
5  
6 6. Beaudoin CE. Hurricane Katrina: addictive behavior trends and predictors. Public  
7  
8 Health Rep. 2011;126, 400-409.  
9  
10  
11 7. Flory K , Hankin BL , Kloos B , Cheely C , Turecki G. Alcohol and cigarette use and  
12  
13 misuse among Hurricane Katrina survivors: psychosocial risk and protective factors.  
14  
15 Subst Use Misuse. 2009;44, 1711-1724.  
16  
17  
18 8. Erskine N , Daley V , Stevenson S , Rhodes B , Beckert L. Smoking prevalence  
19  
20 increases following Canterbury earthquakes. The Sci World J. 2013,596957.  
21  
22  
23 9. Naoi K , Local mental health activity after the Nligata-ken Chuetsu Earthquake :  
24  
25 Findngs of investigations performed three and a half months and thirteen months after  
26  
27 the eartihquake, and analysis about the risk factor of PTSD. Jap Bull Soc Psychiatry  
28  
29 2009;18,52-62.  
30  
31  
32 10. Vlahov D , Galea S , Ahern J , Resnick H , Boscarino JA. Gold,J , et al.  
33  
34 Consumption of cigarettes, alcohol, and marijuana among New York City residents six  
35  
36 months after the September 11 terrorist attacks. Am J Drug Alcohol Abuse.  
37  
38 2004;30,385-407.  
39  
40  
41 11. Ohira T , Hosoya M , Yasumura S , Satoh H , Suzuki H , Sakai A , et al. Effect of  
42  
43 evacuation on body weight after the Great East Japan Earthquake. Am J Prev Med.  
44  
45 2016;50,553-560.  
46  
47  
48  
49  
50  
51  
52  
53  
54  
55  
56  
57  
58  
59  
60

- 1  
2  
3  
4  
5  
6 12. Satoh H , Ohira T , Nagai M , Hosoya M , Sakai A , Watanabe T , et al. A hypo-  
7  
8 high-density lipoprotein cholesterolemia is caused by evacuation after the Fukushima  
9  
10 Daiichi Nuclear Power Plant accident: Results from the Fukushima Health Management  
11  
12 Survey. *Intern Med.* 2016;55, 1967-76.  
13  
14  
15  
16  
17 13. Sakai A , Ohira T , Hosoya M , Ohtsuru A , Satoh H , Kawasaki Y , et al. Life as an  
18  
19 evacuee after the Fukushima Daiichi nuclear power plant accident is a cause of  
20  
21 polycythemia: the Fukushima Health Management Survey. *BMC Public Health.*  
22  
23 2014;14,1318.  
24  
25  
26  
27  
28 14. Suzuki H , Ohira T , Takeishi Y , Hosoya M , Yasumura S , Satoh H , et al. Increased  
29  
30 prevalence of atrial fibrillation after the Great East Japan Earthquake: Results from the  
31  
32 Fukushima Health Management Survey. *Int J Cardiol.* 2015;198,102-105.  
33  
34  
35  
36  
37 15. Iwasa H , Suzuki Y , Shiga T , Maeda M , Yabe H , Yasumura S. Psychometric  
38  
39 Evaluation of the Japanese Version of the Posttraumatic Stress Disorder Checklist in  
40  
41 Community Dwellers Following the Fukushima Daiichi Nuclear Power Plant  
42  
43 Incident-The Fukushima Health Management Survey. *SAGE Open Jun 2016, 6 (2)*  
44  
45 2158244016652444; DOI: 10.1177/2158244016652444  
46  
47  
48  
49  
50  
51 16. Suzuki Y , Yabe H , Horikoshi N , Yasumura S , Kawakami N , Ohtsuru A , Mashiko H ,  
52  
53 Maeda M; Mental Health Group of the Fukushima Health Management Survey.  
54  
55  
56  
57  
58  
59  
60



- 1  
2  
3  
4  
5  
6 Diagnostic accuracy of Japanese posttraumatic stress measures after a complex disaster:  
7  
8 The Fukushima Health Management Survey. *Asia Pac Psychiatry*. 2016 Aug 9. doi:  
9  
10 10.1111/appy.12248.17. Blanchard EB , Jones-Alexander J , Buckley TC , Forneris CA.  
11  
12 10.1111/appy.12248.17. Blanchard EB , Jones-Alexander J , Buckley TC , Forneris CA.  
13  
14 Psychometric properties of the PTSD Checklist (PCL). *Behaviour Research and*  
15  
16  
17 *Therapy*, 1996;34, 669–673. doi: 10.1016/0005-7967(96)00033-2  
18  
19  
20 18. Kessler RC , Barker PR , Colpe LJ , Epstein JF , Gfroerer JC , Hiripi E , Howest  
21  
22 MJ , Normand SL , Manderscheid RW , Walters EE , Zaslavsky AM. Screening for  
23  
24 serious mental illness in the general population. *Arch Gen Psychiatry* 2003;60:184–189.  
25  
26  
27  
28 19. Ronald CK , Sandro G , Russell TJ , Holly AP , Hurricane Katrina Community  
29  
30  
31  
32  
33  
34  
35  
36  
37  
38  
39  
40  
41  
42  
43  
44  
45  
46  
47  
48  
49  
50  
51  
52  
53  
54  
55  
56  
57  
58  
59  
60
- Advisory Group. Mental illness and suicidality after Hurricane Katrina. *Bull World Health Organ* 2006;84:930–939.
20. Kessler RC , Green JG , Gruber MJ , Sampson MA , Bromet E , Cuitan M ,  
Furukawa TA , Gureje O , Hinkov H , Hu CY , Lara C , Lee S , Mneimneh Z , Myer L ,  
Oakley-Browne M , Posada-Villa J , Sagar R , Viana MC , Zaslavsky AM. Screening for  
serious mental illness in the general population with the K6 screening scale: results  
from the WHO World Mental Health (WMH) survey initiative. *Int J Methods Psychiatr Res* 2010;19:4–22.

- 1  
2  
3  
4  
5  
6 21. Furukawa TA , Kawakami N , Saitoh M , Ono Y , Nakane Y , Nakamura Y ,  
7  
8 Tachimori H , Iwata N , Uda H , Nakane H , Watanabe M , Naganuma Y , Hata Y ,  
9  
10 Kobayashi M , Miyake Y , Takeshima T , Kikkawa T. The performance of the Japanese  
11  
12 version of the K6 and K10 in the World Mental Health Survey Japan. *Int J Methods*  
13  
14 *Psychiatr Res* 2008;17:152–158.  
15  
16  
17  
18  
19 22. Galea S , Brewin CR , Gruber M , Gruber M , Jones RR , King DW , King LA ,  
20  
21 McNally RJ , Ursano RJ , Petukhova M , Kessler RC. Exposure to hurricane-related  
22  
23 stressors and mental illness after Hurricane Katrina. *Arch Gen Psychiatry*  
24  
25  
26 2007;64:1427–1434.  
27  
28  
29  
30  
31 23. Ruth A. Parslow & Anthony F. Jorm. Tobacco use after experiencing a major natural  
32  
33 disaster: analysis of a longitudinal study of 2063 young adults.  
34  
35  
36  
37 doi:10.1111/j.1360-0443.2006.01481.x ADDITION 101,1044-1050.  
38  
39  
40 24. Cancer Registry and Statistics. Cancer Information Service, National Cancer Center,  
41  
42 Japan., *Pref\_Smoking\_Rate* (2001-2013). Available from:  
43  
44  
45 [http://ganjoho.jp/data/reg\\_stat/statistics/dl/Pref\\_Smoking\\_Rate\(2001\\_2013\).xls](http://ganjoho.jp/data/reg_stat/statistics/dl/Pref_Smoking_Rate(2001_2013).xls).  
46  
47  
48 (accessed 5 May 2017)  
49  
50  
51 25. JAPAN TOBACCO INC(JTI),2011. Japanese Domestic Cigarette Sales Results for  
52  
53 April 2011 (Preliminary Report) 2011 [cited 2015 June 11]. Available from:  
54  
55  
56  
57  
58  
59  
60

1  
2  
3  
4  
5  
6 [http://www.jt.com/investors/media/press\\_releases/2011/pdf/20110512\\_12.pdf](http://www.jt.com/investors/media/press_releases/2011/pdf/20110512_12.pdf). (accessed

7  
8  
9 5 Jun 2015)

10  
11 26. Ministry of Health Labour and Welfare., 2012. Summarize the results of National

12  
13  
14 Health Nutrition Survey. 2012. [cited 2015 December 1]. Available from:

15  
16  
17 <http://www.mhlw.go.jp/file/04-Houdouhappyou-10904750-Kenkoukyoku-Gantaisakuke>

18  
19  
20 nkouzoushinka/0000099296.pdf. (accessed 5 Jun 2016)

**Table 1.** Geographical, disaster-related and psychosocial factors according to the categories of change in smoking status among 58,754 men and women in the evacuation area.

|                                                       | Total   |      | Nonsmoking-Nonsmoking |      | Nonsmoking-Smoking |      | P values | Smoking-Smoking |      | Smoking-Nonsmoking |      | P values |
|-------------------------------------------------------|---------|------|-----------------------|------|--------------------|------|----------|-----------------|------|--------------------|------|----------|
|                                                       | n       | %    | n                     | %    | n                  | %    |          | n               | %    | n                  | %    |          |
| <b>Geographical factor</b>                            |         |      |                       |      |                    |      |          |                 |      |                    |      |          |
| <b>Sex</b>                                            | n=58754 |      | n=44095               |      | n=634              |      |          | n=12461         |      | n=1564             |      |          |
| Men                                                   | 26764   | 45.6 | 16351                 | 37.1 | 376                | 59.3 | <.0001   | 9040            | 72.5 | 997                | 63.7 | <.0001   |
| women                                                 | 31990   | 54.4 | 27744                 | 62.9 | 258                | 40.7 |          | 3421            | 27.5 | 567                | 36.3 |          |
| <b>Age</b>                                            | n=58754 |      |                       |      |                    |      |          |                 |      |                    |      |          |
| Ages 20-49 years                                      | 21479   | 36.6 | 13571                 | 30.8 | 382                | 60.3 |          | 6727            | 54.0 | 799                | 51.1 |          |
| Ages 50-64 years                                      | 18744   | 31.9 | 14136                 | 32.1 | 147                | 23.2 | <.0001   | 4012            | 32.2 | 449                | 28.7 | <.0001   |
| Ages ≥65 years                                        | 18531   | 31.5 | 16388                 | 37.2 | 105                | 16.6 |          | 1722            | 13.8 | 316                | 20.2 |          |
| <b>Education level</b>                                | n=57076 |      |                       |      |                    |      |          |                 |      |                    |      |          |
| Primary or middle school                              | 13383   | 23.4 | 10680                 | 25.0 | 102                | 16.8 |          | 2329            | 19.1 | 272                | 17.7 |          |
| High school                                           | 28331   | 49.6 | 20190                 | 47.2 | 331                | 54.5 |          | 6986            | 57.2 | 824                | 53.8 |          |
| Vocational college, or Junior college                 | 10127   | 17.7 | 7849                  | 18.4 | 116                | 19.1 | <.0001   | 1883            | 15.4 | 279                | 18.2 | <.0001   |
| University, or graduate school                        | 5235    | 9.2  | 4014                  | 9.4  | 58                 | 9.6  |          | 1005            | 8.2  | 158                | 10.3 |          |
| <b>Disaster-related factors</b>                       |         |      |                       |      |                    |      |          |                 |      |                    |      |          |
| <b>Living arrangement</b>                             | n=47099 |      |                       |      |                    |      |          |                 |      |                    |      |          |
| Evacuation shelter                                    | 522     | 1.1  | 401                   | 1.1  | 8                  | 1.6  |          | 99              | 1.0  | 14                 | 1.1  |          |
| Temporary housing                                     | 5343    | 11.3 | 3989                  | 11.3 | 61                 | 12.6 |          | 1164            | 11.6 | 129                | 10.3 |          |
| Rental house or apartment                             | 19330   | 41.0 | 13654                 | 38.7 | 270                | 55.7 |          | 4780            | 47.4 | 626                | 49.8 |          |
| Relative's home                                       | 2127    | 4.5  | 1731                  | 4.9  | 21                 | 4.3  | <.0001   | 325             | 3.2  | 50                 | 4.0  | <.0001   |
| Own home                                              | 17576   | 37.3 | 13862                 | 39.3 | 101                | 20.8 |          | 3252            | 32.3 | 361                | 28.7 |          |
| Others                                                | 2201    | 4.7  | 1644                  | 4.7  | 24                 | 4.9  |          | 457             | 4.5  | 76                 | 6.1  |          |
| <b>Experienced living in evacuation shelters</b>      | n=58754 |      |                       |      |                    |      |          |                 |      |                    |      |          |
| Yes                                                   | 15865   | 27.0 | 11887                 | 27.0 | 198                | 31.2 | <.0001   | 3365            | 27.0 | 415                | 26.5 | <.0001   |
| <b>House was damaged</b>                              | n=58754 |      |                       |      |                    |      |          |                 |      |                    |      |          |
| Yes                                                   | 8706    | 14.8 | 6528                  | 14.8 | 134                | 21.1 | <.0001   | 1812            | 14.5 | 232                | 14.8 | <.0001   |
| <b>History of mental illness</b>                      | n=57137 |      |                       |      |                    |      |          |                 |      |                    |      |          |
| Yes                                                   | 3149    | 5.5  | 2332                  | 5.4  | 60                 | 9.9  | <.0001   | 662             | 5.5  | 95                 | 6.2  | <.0001   |
| <b>Experience of disaster</b>                         | n=58754 |      |                       |      |                    |      |          |                 |      |                    |      |          |
| Experienced tsunami                                   | n=58754 |      |                       |      |                    |      |          |                 |      |                    |      |          |
| Yes                                                   | 11807   | 20.1 | 8559                  | 19.4 | 176                | 27.8 | <.0001   | 2747            | 22.0 | 325                | 20.8 | <.0001   |
| <b>Psychosocial factors</b>                           | n=58754 |      |                       |      |                    |      |          |                 |      |                    |      |          |
| Unemployed                                            | n=58754 |      |                       |      |                    |      |          |                 |      |                    |      |          |
| Yes                                                   | 12255   | 20.9 | 8643                  | 19.6 | 172                | 27.1 | <.0001   | 3016            | 24.2 | 424                | 27.1 | <.0001   |
| Income decreased                                      | n=58754 |      |                       |      |                    |      |          |                 |      |                    |      |          |
| Yes                                                   | 11141   | 19.0 | 7548                  | 17.1 | 145                | 22.9 | <.0001   | 3117            | 25.0 | 331                | 21.2 | <.0001   |
| <b>Presence of traumatic symptoms(PCL-S) ≥44</b>      | n=58754 |      |                       |      |                    |      |          |                 |      |                    |      |          |
| Yes                                                   | 12266   | 20.9 | 9247                  | 21.0 | 210                | 33.1 | <.0001   | 2515            | 20.2 | 294                | 18.8 | <.0001   |
| <b>Presence of non-specific mental illness(K6)≥13</b> | n=58754 |      |                       |      |                    |      |          |                 |      |                    |      |          |
| Yes                                                   | 8556    | 14.0 | 6337                  | 14.4 | 157                | 24.8 | <.0001   | 1853            | 14.9 | 209                | 13.4 | <.0001   |

**TABLE 2** Age- and sex-adjusted and multivariable-adjusted ORs and 95% confidence intervals of started to smoking after the disaster according to geographical, disaster-related and psychosocial factors among 44,729 non-smokers before the disaster.

| Model                                                          | Age- and sex-adjusted model |             |          | Multivariable-adjusted model <sup>#</sup> |             |          |
|----------------------------------------------------------------|-----------------------------|-------------|----------|-------------------------------------------|-------------|----------|
|                                                                | OR                          | (95%CI)     | P values | OR                                        | (95%CI)     | P values |
| n=44729                                                        |                             |             |          |                                           |             |          |
| <b>Geographical factor</b>                                     |                             |             |          |                                           |             |          |
| Men (versus women) <sup>†</sup>                                | 2.91                        | 2.48 - 3.42 | <.0001   | 3.01                                      | 2.55 - 3.55 | <.0001   |
| <b>Age<sup>**</sup></b>                                        |                             |             |          |                                           |             |          |
| Ages 20-49 years                                               | 1.00                        |             |          |                                           |             |          |
| Ages 50-64 years                                               | 0.34                        | 0.28 - 0.41 | <.0001   | 0.32                                      | 0.26 - 0.39 | <.0001   |
| Ages ≥65 years                                                 | 0.19                        | 0.16 - 0.24 | <.0001   | 0.17                                      | 0.14 - 0.22 | <.0001   |
| Higher education (junior college and higher) <sup>***</sup>    | 0.68                        | 0.57 - 0.82 | <.0001   | 0.69                                      | 0.58 - 0.84 | <.001    |
| <b>Disaster-related factors<sup>***</sup></b>                  |                             |             |          |                                           |             |          |
| <b>Living arrangement<sup>***</sup></b>                        |                             |             |          |                                           |             |          |
| Own home                                                       | 1.00                        |             |          |                                           |             |          |
| Evacuation Shelter                                             | 1.53                        | 0.75 - 3.13 | 0.246    | 1.06                                      | 0.89 - 1.26 | 0.531    |
| Temporary housing                                              | 1.46                        | 1.10 - 1.93 | 0.009    | 1.20                                      | 0.90 - 1.60 | 0.212    |
| Rental housing or apartment                                    | 1.38                        | 1.16 - 1.64 | 0.000    | 1.31                                      | 1.10 - 1.56 | 0.002    |
| Relative's home                                                | 1.18                        | 0.75 - 1.85 | 0.467    | 1.14                                      | 0.73 - 0.73 | 0.572    |
| <b>Experienced living in evacuation shelters<sup>***</sup></b> |                             |             |          |                                           |             |          |
| House was damaged                                              | 1.64                        | 1.35 - 1.99 | <.0001   | 1.24                                      | 1.01 - 1.52 | 0.042    |
| History of mental illness <sup>***</sup>                       | 2.03                        | 1.54 - 2.67 | <.0001   | 1.45                                      | 1.09 - 1.92 | 0.011    |
| <b>Experience of disaster<sup>***</sup></b>                    |                             |             |          |                                           |             |          |
| Experienced tsunami                                            | 1.57                        | 1.32 - 1.88 | <.0001   | 1.29                                      | 1.07 - 1.56 | 0.007    |
| <b>Psychosocial factors<sup>***</sup></b>                      |                             |             |          |                                           |             |          |
| Unemployed                                                     | 1.53                        | 1.28 - 1.83 | <.0001   | 1.21                                      | 1.01 - 1.46 | 0.042    |
| Income decreased                                               | 1.18                        | 0.97 - 1.42 | 0.092    | 1.05                                      | 0.87 - 1.28 | 0.597    |
| Presence of traumatic symptoms(PCL-S) ≥44 <sup>***</sup>       | 2.38                        | 2.01 - 2.83 | <.0001   | 1.67                                      | 1.35 - 2.08 | <.0001   |
| Presence of non-specific mental illness(K6)≥13 <sup>***</sup>  | 2.26                        | 1.88 - 2.72 | <.0001   | 1.38                                      | 1.09 - 1.74 | 0.008    |

<sup>†</sup>Age-Adjusted

<sup>\*\*</sup>Sex-Adjusted

<sup>\*\*\*</sup>Age- and sex-adjusted

<sup>#</sup>Adjusted for age, sex, living arrangement, experienced living in evacuation shelters, Higher education, history of mental illness, unemployed, income decreased, experienced tsunami, presence of traumatic symptoms, and Presence of non-specific mental illness.

**TABLE 3** Age- and sex-adjusted and multivariable-adjusted ORs and 95% confidence intervals of quitted to smoking after the disaster according to geographical, disaster-related and psychosocial factors among 14,025 smokers before the disaster.

| Model                                                          | Age- and sex-adjusted model |             |          | Multivariable-adjusted model <sup>#</sup> |             |          |
|----------------------------------------------------------------|-----------------------------|-------------|----------|-------------------------------------------|-------------|----------|
|                                                                | OR                          | (95%CI)     | P values | OR                                        | (95%CI)     | P values |
| n=14025                                                        |                             |             |          |                                           |             |          |
| <b>Geographical factor</b>                                     |                             |             |          |                                           |             |          |
| Men (versus women) <sup>*</sup>                                | 0.63                        | 0.56 - 0.71 | <.0001   | 0.64                                      | 0.57 - 0.72 | <.0001   |
| <b>Age<sup>**</sup></b>                                        |                             |             |          |                                           |             |          |
| Ages 20-49 years                                               | 1.00                        |             |          |                                           |             |          |
| Ages 50-64 years                                               | 1.02                        | 0.90 - 1.15 | 0.792    | 1.06                                      | 0.94 - 1.20 | 0.362    |
| Ages ≥65 years                                                 | 1.74                        | 1.51 - 2.01 | <.0001   | 1.89                                      | 1.62 - 2.19 | <.0001   |
| Higher education (junior college and higher) <sup>***</sup>    | 1.32                        | 1.17 - 1.49 | <.0001   | 1.31                                      | 1.16 - 1.48 | <.0001   |
| <b>Disaster-related factors<sup>***</sup></b>                  |                             |             |          |                                           |             |          |
| <b>Living arrangement<sup>***</sup></b>                        |                             |             |          |                                           |             |          |
| Own home                                                       | 1.00                        |             |          |                                           |             |          |
| Evacuation Shelter                                             | 1.16                        | 0.66 - 2.04 | 0.613    | 0.97                                      | 0.86 - 1.10 | 0.641    |
| Temporary housing                                              | 0.90                        | 0.74 - 1.10 | 0.314    | 0.92                                      | 0.75 - 1.13 | 0.417    |
| Rental housing or apartment                                    | 1.09                        | 0.97 - 1.22 | 0.146    | 1.09                                      | 0.97 - 1.23 | 0.145    |
| Relative's home                                                | 1.24                        | 0.91 - 1.68 | 0.180    | 1.17                                      | 0.86 - 1.60 | 0.319    |
| <b>Experienced living in evacuation shelters<sup>***</sup></b> |                             |             |          |                                           |             |          |
| House was damaged                                              | 1.03                        | 0.89 - 1.19 | 0.705    | 1.03                                      | 0.88 - 1.20 | 0.745    |
| History of mental illness <sup>***</sup>                       | 1.09                        | 0.87 - 1.37 | 0.436    | 1.16                                      | 0.92 - 1.45 | 0.218    |
| <b>Experience of disaster<sup>***</sup></b>                    |                             |             |          |                                           |             |          |
| Experienced tsunami                                            | 0.97                        | 0.85 - 1.11 | 0.652    | 0.98                                      | 0.85 - 1.12 | 0.733    |
| <b>Psychosocial factors<sup>***</sup></b>                      |                             |             |          |                                           |             |          |
| Unemployed                                                     | 1.09                        | 0.96 - 1.23 | 0.171    | 1.10                                      | 0.97 - 1.26 | 0.122    |
| Income decreased                                               | 0.85                        | 0.75 - 0.97 | 0.012    | 0.86                                      | 0.76 - 0.98 | 0.024    |
| Presence of traumatic symptoms(PCL-S)≥44 <sup>***</sup>        | 0.85                        | 0.74 - 0.97 | 0.016    | 0.88                                      | 0.75 - 1.04 | 0.127    |
| Presence of non-specific mental illness(K6)≥13 <sup>***</sup>  | 0.83                        | 0.71 - 0.97 | 0.022    | 0.87                                      | 0.72 - 1.05 | 0.148    |

<sup>\*</sup>Age-Adjusted

<sup>\*\*</sup>Sex-Adjusted

<sup>\*\*\*</sup>Age- and sex-adjusted

<sup>#</sup>Adjusted for age, sex, living arrangement, experienced living in evacuation shelters, Higher education, history of mental illness, unemployed, income decreased, experienced tsunami, presence of traumatic symptoms, and Presence of non-specific mental illness.

## STROBE Statement—checklist of items that should be included in reports of observational studies

|                                    | Item No | Recommendation                                                                                                                                                                                                                                                                                                                                                                                                                                                                                                                                                                                                                                                                                   |
|------------------------------------|---------|--------------------------------------------------------------------------------------------------------------------------------------------------------------------------------------------------------------------------------------------------------------------------------------------------------------------------------------------------------------------------------------------------------------------------------------------------------------------------------------------------------------------------------------------------------------------------------------------------------------------------------------------------------------------------------------------------|
| <b>Title and abstract (P1-6)</b>   | 1       | (a) Indicate the study's design with a commonly used term in the title or the abstract<br>(b) Provide in the abstract an informative and balanced summary of what was done and what was found                                                                                                                                                                                                                                                                                                                                                                                                                                                                                                    |
| <b>Introduction (P7-8)</b>         |         |                                                                                                                                                                                                                                                                                                                                                                                                                                                                                                                                                                                                                                                                                                  |
| Background/rationale (P7)          | 2       | Explain the scientific background and rationale for the investigation being reported                                                                                                                                                                                                                                                                                                                                                                                                                                                                                                                                                                                                             |
| Objectives (P8)                    | 3       | State specific objectives, including any prespecified hypotheses                                                                                                                                                                                                                                                                                                                                                                                                                                                                                                                                                                                                                                 |
| <b>Methods (P8-11)</b>             |         |                                                                                                                                                                                                                                                                                                                                                                                                                                                                                                                                                                                                                                                                                                  |
| Study design (P8)                  | 4       | Present key elements of study design early in the paper                                                                                                                                                                                                                                                                                                                                                                                                                                                                                                                                                                                                                                          |
| Setting (P8)                       | 5       | Describe the setting, locations, and relevant dates, including periods of recruitment, exposure, follow-up, and data collection                                                                                                                                                                                                                                                                                                                                                                                                                                                                                                                                                                  |
| Participants (P8-9)                | 6       | (a) <i>Cohort study</i> —Give the eligibility criteria, and the sources and methods of selection of participants. Describe methods of follow-up<br><i>Case-control study</i> —Give the eligibility criteria, and the sources and methods of case ascertainment and control selection. Give the rationale for the choice of cases and controls<br><i>Cross-sectional study</i> —Give the eligibility criteria, and the sources and methods of selection of participants<br>(b) <i>Cohort study</i> —For matched studies, give matching criteria and number of exposed and unexposed<br><i>Case-control study</i> —For matched studies, give matching criteria and the number of controls per case |
| Variables (P10-P11)                | 7       | Clearly define all outcomes, exposures, predictors, potential confounders, and effect modifiers. Give diagnostic criteria, if applicable                                                                                                                                                                                                                                                                                                                                                                                                                                                                                                                                                         |
| Data sources/ measurement (P8-P11) | 8*      | For each variable of interest, give sources of data and details of methods of assessment (measurement). Describe comparability of assessment methods if there is more than one group                                                                                                                                                                                                                                                                                                                                                                                                                                                                                                             |
| Bias (None)                        | 9       | Describe any efforts to address potential sources of bias                                                                                                                                                                                                                                                                                                                                                                                                                                                                                                                                                                                                                                        |
| Study size (P8-9)                  | 10      | Explain how the study size was arrived at                                                                                                                                                                                                                                                                                                                                                                                                                                                                                                                                                                                                                                                        |
| Quantitative variables (P10-11)    | 11      | Explain how quantitative variables were handled in the analyses. If applicable, describe which groupings were chosen and why                                                                                                                                                                                                                                                                                                                                                                                                                                                                                                                                                                     |
| Statistical methods (P11-12)       | 12      | (a) Describe all statistical methods, including those used to control for confounding<br>(b) Describe any methods used to examine subgroups and interactions<br>(c) Explain how missing data were addressed<br>(d) <i>Cohort study</i> —If applicable, explain how loss to follow-up was addressed<br><i>Case-control study</i> —If applicable, explain how matching of cases and controls was addressed<br><i>Cross-sectional study</i> —If applicable, describe analytical methods taking account of sampling strategy<br>(e) Describe any sensitivity analyses                                                                                                                                |

Continued on next page

**Results (P12-14)**

|                           |     |                                                                                                                                                                                                                                                                                                                                                                                                               |
|---------------------------|-----|---------------------------------------------------------------------------------------------------------------------------------------------------------------------------------------------------------------------------------------------------------------------------------------------------------------------------------------------------------------------------------------------------------------|
| Participants (P12)        | 13* | (a) Report numbers of individuals at each stage of study—eg numbers potentially eligible, examined for eligibility, confirmed eligible, included in the study, completing follow-up, and analysed<br>(b) Give reasons for non-participation at each stage<br>(c) Consider use of a flow diagram                                                                                                               |
| Descriptive data (P13-14) | 14* | (a) Give characteristics of study participants (eg demographic, clinical, social) and information on exposures and potential confounders<br>(b) Indicate number of participants with missing data for each variable of interest<br>(c) <i>Cohort study</i> —Summarise follow-up time (eg, average and total amount)                                                                                           |
| Outcome data (P13-14)     | 15* | <i>Cohort study</i> —Report numbers of outcome events or summary measures over time<br><i>Case-control study</i> —Report numbers in each exposure category, or summary measures of exposure<br><i>Cross-sectional study</i> —Report numbers of outcome events or summary measures                                                                                                                             |
| Main results (P13-14)     | 16  | (a) Give unadjusted estimates and, if applicable, confounder-adjusted estimates and their precision (eg, 95% confidence interval). Make clear which confounders were adjusted for and why they were included<br>(b) Report category boundaries when continuous variables were categorized<br>(c) If relevant, consider translating estimates of relative risk into absolute risk for a meaningful time period |
| Other analyses<br>None    | 17  | Report other analyses done—eg analyses of subgroups and interactions, and sensitivity analyses                                                                                                                                                                                                                                                                                                                |

**Discussion (P14-16)**

|                         |    |                                                                                                                                                                            |
|-------------------------|----|----------------------------------------------------------------------------------------------------------------------------------------------------------------------------|
| Key results (P14-16)    | 18 | Summarise key results with reference to study objectives                                                                                                                   |
| Limitations (P16-17)    | 19 | Discuss limitations of the study, taking into account sources of potential bias or imprecision. Discuss both direction and magnitude of any potential bias                 |
| Interpretation (P17)    | 20 | Give a cautious overall interpretation of results considering objectives, limitations, multiplicity of analyses, results from similar studies, and other relevant evidence |
| Generalisability<br>P17 | 21 | Discuss the generalisability (external validity) of the study results                                                                                                      |

**Other information (P18-19)**

|               |    |                                                                                                                                                               |
|---------------|----|---------------------------------------------------------------------------------------------------------------------------------------------------------------|
| Funding (P19) | 22 | Give the source of funding and the role of the funders for the present study and, if applicable, for the original study on which the present article is based |
|---------------|----|---------------------------------------------------------------------------------------------------------------------------------------------------------------|

\*Give information separately for cases and controls in case-control studies and, if applicable, for exposed and unexposed groups in cohort and cross-sectional studies.

**Note:** An Explanation and Elaboration article discusses each checklist item and gives methodological background and published examples of transparent reporting. The STROBE checklist is best used in conjunction with this article (freely available on the Web sites of PLoS Medicine at <http://www.plosmedicine.org/>, Annals of Internal Medicine at <http://www.annals.org/>, and Epidemiology at <http://www.epidem.com/>). Information on the STROBE Initiative is available at [www.strobe-statement.org](http://www.strobe-statement.org).



# BMJ Open

## Effects of disaster-related and psychosocial factors on changes in smoking status after a disaster: A cross-sectional survey after the Great East Japan Earthquake

|                                 |                                                                                                                                                                                                                                                                                                                                                                                                                                                                                                                                                                                                                                                                                                                                                                                                                                                                                                                                                                                                                                                                                                                                                                                                                                                                                                                                                                                                                                                                                                                                                                                                                                                                                                                                                                                                                                                                                                                                                                                                                                                                          |
|---------------------------------|--------------------------------------------------------------------------------------------------------------------------------------------------------------------------------------------------------------------------------------------------------------------------------------------------------------------------------------------------------------------------------------------------------------------------------------------------------------------------------------------------------------------------------------------------------------------------------------------------------------------------------------------------------------------------------------------------------------------------------------------------------------------------------------------------------------------------------------------------------------------------------------------------------------------------------------------------------------------------------------------------------------------------------------------------------------------------------------------------------------------------------------------------------------------------------------------------------------------------------------------------------------------------------------------------------------------------------------------------------------------------------------------------------------------------------------------------------------------------------------------------------------------------------------------------------------------------------------------------------------------------------------------------------------------------------------------------------------------------------------------------------------------------------------------------------------------------------------------------------------------------------------------------------------------------------------------------------------------------------------------------------------------------------------------------------------------------|
| Journal:                        | <i>BMJ Open</i>                                                                                                                                                                                                                                                                                                                                                                                                                                                                                                                                                                                                                                                                                                                                                                                                                                                                                                                                                                                                                                                                                                                                                                                                                                                                                                                                                                                                                                                                                                                                                                                                                                                                                                                                                                                                                                                                                                                                                                                                                                                          |
| Manuscript ID                   | bmjopen-2017-018943.R1                                                                                                                                                                                                                                                                                                                                                                                                                                                                                                                                                                                                                                                                                                                                                                                                                                                                                                                                                                                                                                                                                                                                                                                                                                                                                                                                                                                                                                                                                                                                                                                                                                                                                                                                                                                                                                                                                                                                                                                                                                                   |
| Article Type:                   | Research                                                                                                                                                                                                                                                                                                                                                                                                                                                                                                                                                                                                                                                                                                                                                                                                                                                                                                                                                                                                                                                                                                                                                                                                                                                                                                                                                                                                                                                                                                                                                                                                                                                                                                                                                                                                                                                                                                                                                                                                                                                                 |
| Date Submitted by the Author:   | 27-Jan-2018                                                                                                                                                                                                                                                                                                                                                                                                                                                                                                                                                                                                                                                                                                                                                                                                                                                                                                                                                                                                                                                                                                                                                                                                                                                                                                                                                                                                                                                                                                                                                                                                                                                                                                                                                                                                                                                                                                                                                                                                                                                              |
| Complete List of Authors:       | <p>Nakano, Hironori ; Fukushima Medical University, Radiation Medical Science Center for the Fukushima Health Management Survey; Fukushima Medical University School of Medicine, Epidemiology</p> <p>Ohira, Tetsuya; Fukushima Medical University, Department of Epidemiology; Fukushima Medical University School of Medicine, Radiation Medical Center for Fukushima Health Management Survey</p> <p>Maeda, Masaharu ; Fukushima Medical University, Radiation Medical Science Center for the Fukushima Health Management Survey; Fukushima Medical University School of Medicine, Disaster Psychiatry</p> <p>Yabe, Hirooki; Fukushima Medical University School of Medicine, Neuropsychiatry; Radiation Medical Science Center for the Fukushima Health Management Survey</p> <p>Ohtsuru, Akira; Fukushima Medical University,</p> <p>Suzuki, Yuriko; National Institute of Mental Health, National Center of Neurology and Psychiatry,</p> <p>Harigane, Mayumi; Radiation Medical Science Center for the Fukushima Health Management Survey</p> <p>Horikoshi, Naoko; Radiation Medical Science Center for the Fukushima Health Management Survey,</p> <p>Nagai, Masato; Tohoku University Graduate School of Medicine, Division of Epidemiology, Department of Public Health and Forensic Medicine; Shiga University of Medical Science, Department of Health Science,</p> <p>Zhang, Wen; Fukushima Medical University School of Medicine, Epidemiology</p> <p>Takahashi, Hideto; Fukushima Medical University School of Medicine, Office of Information Management and Statistics, Radiation Medical Science Center for the Fukushima Health Management Survey, Faculty of Medicine, ; Fukushima Medical University School of Medicine, Radiation Medical Science Center for the Fukushima Health Management Survey</p> <p>Yasumura, Seiji; Fukushima Medical University</p> <p>Iso, Hiroyasu; Osaka University Graduate School of Medicine, Public Health, Department of Social and Environmental Medicine</p> <p>Kamiya, Kenji; Fukushima Medical University</p> |
| <b>Primary Subject Heading</b>: | Smoking and tobacco                                                                                                                                                                                                                                                                                                                                                                                                                                                                                                                                                                                                                                                                                                                                                                                                                                                                                                                                                                                                                                                                                                                                                                                                                                                                                                                                                                                                                                                                                                                                                                                                                                                                                                                                                                                                                                                                                                                                                                                                                                                      |
| Secondary Subject Heading:      | Epidemiology, Public health                                                                                                                                                                                                                                                                                                                                                                                                                                                                                                                                                                                                                                                                                                                                                                                                                                                                                                                                                                                                                                                                                                                                                                                                                                                                                                                                                                                                                                                                                                                                                                                                                                                                                                                                                                                                                                                                                                                                                                                                                                              |
| Keywords:                       | Disaster, Smoking cessation, Socioeconomic status, Population-based,                                                                                                                                                                                                                                                                                                                                                                                                                                                                                                                                                                                                                                                                                                                                                                                                                                                                                                                                                                                                                                                                                                                                                                                                                                                                                                                                                                                                                                                                                                                                                                                                                                                                                                                                                                                                                                                                                                                                                                                                     |

1  
2  
3  
4  
5  
6  
7  
8  
9  
10  
11  
12  
13  
14  
15  
16  
17  
18  
19  
20  
21  
22  
23  
24  
25  
26  
27  
28  
29  
30  
31  
32  
33  
34  
35  
36  
37  
38  
39  
40  
41  
42  
43  
44  
45  
46  
47  
48  
49  
50  
51  
52  
53  
54  
55  
56  
57  
58  
59  
60

|  |                      |
|--|----------------------|
|  | Psychological stress |
|  |                      |

SCHOLARONE™  
Manuscripts

For peer review only

1  
2  
3  
4  
5  
6 **Effects of disaster-related and psychosocial factors on changes in smoking status**

7  
8 **after a disaster: A cross-sectional survey after the Great East Japan Earthquake**

9  
10  
11  
12  
13  
14 **Author names and affiliations.**

15 Hironori NAKANO <sup>1,2,\*</sup>, Tetsuya OHIRA <sup>1,2</sup>, Masaharu MAEDA <sup>2,3</sup>, Hirooki YABE <sup>4</sup>,  
16 Akira OTSURU <sup>6</sup>, Yuriko SUZUKI <sup>5</sup>, Mayumi HARIGANE <sup>2</sup>, Naoko HORIKOSHI <sup>2</sup>,  
17 Masato NAGAI <sup>1,2, 9,10</sup>, Wen ZHANG <sup>1</sup>, Hideto TAKAHASHI <sup>2</sup>, Seiji YASUMURA <sup>7</sup>,  
18 Hiroyasu ISO <sup>8</sup>, Kenji KAMIYA <sup>2</sup>

19  
20  
21  
22  
23  
24  
25 **Corresponding author.**

26 Hironori NAKANO

27  
28 Radiation Medical Science Center for the Fukushima health management survey,  
29 Fukushima Medical University, 1 Hikariga-oka, Fukushima City 960-1295, JAPAN

30  
31 Phone: +81-24-547-1343; Fax: +81-24-547-1336

32  
33 E-mail: h-nakano@fmu.ac.jp

34  
35  
36  
37  
38 Tetsuya OHIRA, e-mail: teohira@fmu.ac.jp

39  
40 Masaharu MAEDA, e-mail: masagen@fmu.ac.jp

41  
42 Hirooki YABE, e-mail: hyabe@fmu.ac.jp

43  
44 Akira OTSURU, e-mail: ohtsuru@fmu.ac.jp

45  
46 Yuriko SUZUKI, e-mail: yrsuzuki@ncnp.go.jp

47  
48 Mayumi HARIGANE, e-mail: harigane@fmu.ac.jp

49  
50 Naoko HORIKOSHI, e-mail: copepe@fmu.ac.jp

51  
52 Masato NAGAI, e-mail: m-nagai@med.tohoku.ac.jp

53  
54 WEN Zhang, e-mail: zhangw09@fmu.ac.jp

55  
56 Hideto TAKAHASHI, e-mail: htaka@fmu.ac.jp

1  
2  
3  
4  
5 Seiji YASUMURA, e-mail: yasumura@fmu.ac.jp

6  
7 Hiroyasu ISO, e-mail: iso@pbhel.med.osaka-u.ac.jp

8  
9 Kenji KAMIYA, e-mail: [kkamiya@fmu.ac.jp](mailto:kkamiya@fmu.ac.jp)

10  
11  
12  
13 **Author affiliations**

14  
15 1 Department of Epidemiology, Fukushima Medical University, 1 Hikariga-oka,  
16 Fukushima City 960-1295, JAPAN

17  
18 2 Radiation Medical Science Center for the Fukushima Health Management Survey,  
19 Fukushima Medical University, 1 Hikariga-oka, Fukushima City 960-1295, JAPAN

20  
21 3 Department of Disaster Psychiatry, Fukushima Medical University, 1 Hikariga-oka,  
22 Fukushima City 960-1295, JAPAN

23  
24 4 Department of Neuropsychiatry, Fukushima Medical University, 1 Hikariga-oka,  
25 Fukushima City 960-1295, JAPAN

26  
27 5 National Institute of Mental Health: National Center of Neurology and Psychiatry,  
28 4-1-1 Ogawa-Higashi, Kodaira, Tokyo 187-8551, JAPAN

29  
30 6 Department of Radiation Health Management, Fukushima Medical University, 1  
31 Hikariga-oka, Fukushima City 960-1295, JAPAN

32  
33 7 Department of Public Health, Fukushima Medical University, 1 Hikariga-oka,  
34 Fukushima City 960-1295, JAPAN

35  
36 8 Public Health, Graduate School of Medicine Osaka University, 2-2 Yamadaoka, Suita,  
37 Osaka 565-0871, JAPAN

38  
39 9 Tohoku Medical Megabank Organization, Tohoku University, 2-1 Seiryomachi,  
40 Aoba-ku, Sendai, 980-8573, JAPAN

41  
42 10 Graduate School of Medicine, Tohoku University, Sendai, 2-1 Seiryomachi,  
43 Aoba-ku, Sendai, 980-8573, JAPAN

**Keywords**

Disaster, Smoking cessation, Socioeconomic status, Population-based, Psychological stress.

**Word count**

2,749 Words

For peer review only

## Abstract

**Objective:** Few studies have comprehensively examined the changes in smoking status and related factors after a disaster. We examined these factors amongst the residents of the evacuation area in Fukushima after the Great East Japan Earthquake.

**Methods:** The subjects were 58,755 men and women aged  $\geq 20$  years who participated in the Fukushima Health Management Survey in 2012 after the disaster. Using the self-administered questionnaire, the smoking status was determined by current smokers or current non-smokers before and after the disaster. The subjects were divided into 1) non-smokers before and after the disaster, 2) non-smokers before and smokers after the disaster, 3) smokers before and non-smokers after the disaster and 4) smokers before and after the disaster. In age- and sex-adjusted and multivariable-adjusted models, the prevalence ratios (PRs) and 95% confidence intervals (CIs) of changes in smoking status for demographic, disaster-related and psychosocial factors were tested by logistic regression analysis, stratified by smoking status before the disaster.

**Results:** Among 44,729 non-smokers before the disaster, 634(1.4%) started smoking after the disaster. Among 14,025 smokers before the disaster, 1,564(11.1%) quit smoking after the disaster. As a result, the proportion of smokers decreased from 21.2%

1  
2  
3  
4  
5  
6 to 19.6% in the evacuation area. In the multivariable model, factors significantly  
7  
8 associated with start-smoking were being a male or younger, having a lower education  
9  
10 staying in a rental house/apartment, house being damaged, having experienced a  
11  
12 tsunami, changes in jobs, presence of traumatic symptoms and non-specific  
13  
14 psychological distress. On the other hand, factors associated with quit-smoking were  
15  
16 being a female or older, having a higher-education and stable income.  
17  
18  
19  
20  
21

22 **Conclusion:** The proportion of smokers decreased slightly amongst residents in the  
23  
24 evacuation area. The changes in smoking status were associated with disaster-related  
25  
26 psychosocial factors, particularly changes in living conditions, having experienced a  
27  
28 tsunami, changes in jobs and post-traumatic stress disorder.  
29  
30  
31  
32  
33  
34  
35  
36

### 37 **Strengths and limitations of this study**

38  
39 The strengths of this study lie in the sample size and procedures, as it involved a  
40  
41 large-scale survey (n = 58,755) to complete an inventory-based analysis of evacuees  
42  
43 following the earthquake.  
44  
45  
46  
47

48 Smoking status before and after the earthquake was investigated using a  
49  
50 self-administered questionnaire after the disaster, and the number of cigarettes used  
51  
52 among current smokers was not evaluated.  
53  
54  
55  
56  
57  
58  
59  
60

1  
2  
3  
4  
5  
6  
7  
8  
9  
10  
11  
12  
13  
14  
15  
16  
17  
18  
19  
20  
21  
22  
23  
24  
25  
26  
27  
28  
29  
30  
31  
32  
33  
34  
35  
36  
37  
38  
39  
40  
41  
42  
43  
44  
45  
46  
47  
48  
49  
50  
51  
52  
53  
54  
55  
56  
57  
58  
59  
60

This study had an overall low response rate (40.7%); therefore, the representativeness of the target population is uncertain. \_

For peer review only



## Introduction

The Great East Japan Earthquake that occurred on March 11, 2011 was one of the most disastrous events in the history of Japan. About 212,500 people in the Fukushima Prefecture were forced to evacuate due to the Fukushima Dai-ichi nuclear power plant accident following the earthquake and the subsequent tsunami that struck the plant. Six years after the disaster, 77,283 have still been evacuated as of March 2017.

The accident resulted in the disruption of normal lives of the people of Fukushima, loss of life, relocations, maladjustment to new circumstances and induced stressful situations for the evacuees.<sup>1-3</sup> A previous study reported that cumulative mental stress is partly associated with an increased risk of smoking due to increased impulsivity.<sup>4</sup> Furthermore, post-traumatic stress disorder (PTSD) might be associated with an increased risk of smoking.<sup>5</sup> Moreover, most of previous studies reported that the proportion of smokers increased subsequent to disasters, such as Hurricane Katrina<sup>6-8</sup>, earthquakes<sup>9-10</sup> and the September 11 terrorist attacks in New York City<sup>5,11</sup>. All previous studies, however, had adopted a limited sample size ranging between 209 and, 988, and did not examine the change in smoking status in individuals and the related factors. Therefore, the comprehensive examination with a large sample size would be necessary to determine the impact of smoking status by disasters.

1  
2  
3  
4  
5  
6 Amongst the evacuees in Fukushima Prefecture, the prevalence of overweight,  
7  
8 hypertension, diabetes mellitus, dyslipidaemia, polycythaemia and atrial fibrillation  
9  
10 increased one year after the nuclear power plant accident.<sup>12-15</sup> Therefore, the evacuees  
11  
12 are expected to be at a greater risk of cardiovascular diseases if the proportion of current  
13  
14 smoking increases because smoking is a major risk factor for cardiovascular diseases.  
15  
16  
17  
18

19  
20 Hence, we aim to examine the smoking status after the Fukushima Dai-ichi nuclear  
21  
22 power plant accident among more than 100,000 people in the evacuation area of the  
23  
24 Fukushima prefecture. The prevalence of severe degree of traumatic symptoms,  
25  
26 psychological distress and anxiety after the nuclear accident are high among the  
27  
28 residents of the evacuation area<sup>3</sup>. Hence, we also aim to examine the associations of  
29  
30 disaster-related and psychosocial impacts on changes in smoking status.  
31  
32  
33  
34  
35  
36  
37  
38  
39

## 40 **Methods**

### 41 **Participants**

42  
43 Following the Great East Japan Earthquake that occurred on March 11, 2011, the  
44  
45 government designated evacuation instruction zones. Between January and October  
46  
47 2012, the evacuees participated in the Fukushima Health Management Survey of the  
48  
49 Fukushima Dai-ichi Nuclear Power Plant Accident that started in 2011. The ‘Mental  
50  
51  
52  
53  
54  
55  
56  
57  
58  
59  
60

1  
2  
3  
4  
5  
6 Health and Lifestyle Survey', part of that longitudinal study, assesses how the disaster  
7  
8 and subsequent lifestyle of people affect the mental status of the evacuees over a long  
9  
10  
11 period<sup>1,3</sup>.  
12

13  
14 The target population of the survey was men and women aged minimum 15 years  
15  
16 and living in the evacuation zones specified by the government. These zones included  
17  
18 Hirono Town, Naraha Town, Tomioka Town, Kawauchi Village, Okuma Town, Futaba  
19  
20 Town, Namie Town, Katsurao Village, Minamisoma City, Tamura City, Kawamata  
21  
22 Town, Iitate Village and a part of Date City. The questionnaire was mailed on 18  
23  
24  
25  
26  
27  
28 January 2012 to persons who had a certificate of residence in the evacuation area as on  
29  
30  
31 11 March 2011. The number of residents who were born before 1 April 1995 (i.e. high  
32  
33 school students or older) during the disaster was 180,604. The response rate for the  
34  
35 participation was 40.7% (n = 73,569). We used the help of experts to guarantee  
36  
37 precision when entering the data. We also double checked all of the entered data.  
38  
39  
40  
41

42 Since we sought to examine changes in smoking behaviour among the evacuees, we  
43  
44 limited our data to men and women aged minimum 20 years, which is the legal smoking  
45  
46 age in Japan. As a result, we used 58,754 subjects for the analysis.  
47  
48  
49

50  
51 However, "living arrangement" and "experienced living in evacuation shelters" were  
52  
53 suggested to be associated with each other and "became unemployed" and "income has  
54  
55  
56  
57  
58  
59

1  
2  
3  
4  
5  
6 decreased” were also suggested to be associated with each other, therefore, “changes in  
7  
8 jobs” and “living arrangement” were used in the multivariate.  
9

10  
11 The purpose of this study was explained to all responders in a cover letter  
12  
13 distributed with the questionnaire. The cover letter clearly indicated that the return of  
14  
15 the questionnaires would be regarded as consent for study participation. The survey data  
16  
17 collection took 10 months (January to October of 2012), during which approximately  
18  
19 80% of the responses were obtained. This survey was approved by the ethics review  
20  
21 committee of Fukushima Medical University (No. 1316).  
22  
23  
24  
25  
26  
27  
28  
29  
30

31 Using the questionnaire, the smoking status was determined by current smokers  
32  
33 or current non-smokers just before the disaster; however, we did not distinguish people  
34  
35 who never smoked or ex-smokers from current non-smokers. The smoking status 1-year  
36  
37 after the disaster was determined by never smoked, ex-smokers and current smokers.  
38  
39 Then, the changes in the smoking status before and after the disaster were categorized  
40  
41 into four groups as shown in Figure 1: 1) non-smokers before and after the disaster  
42  
43 (non-smokers), 2) non-smokers before and smokers after the disaster (starters), 3)  
44  
45 smokers before and non-smokers after the disaster (quitters) and 4) smokers before and  
46  
47 after the disaster (smokers).  
48  
49  
50  
51  
52  
53  
54  
55  
56  
57  
58  
59  
60

### **Socioeconomic and disaster-related and psychosocial variables**

Socioeconomic and disaster-related variables were assessed using the questionnaire responses, including living arrangements (own home, evacuation shelter, temporary housing, rental housing or apartment and relative's home), whether experienced living in evacuation shelters (yes or no), education level (elementary school, junior high school and high school, vocational college, junior college, university (4 years) and graduate school), history of mental illness (yes or no), whether becoming unemployed (yes or no), whether income decreased (yes or no), whether house was damaged (yes or no), whether experienced tsunami before (yes or no), presence of traumatic symptoms assessed by the Japanese version of PTSD Checklist-Stressor Specific Version [PCL-S] and non-specific psychological distress measured by the Japanese version of the Kessler Psychological Distress Scale [K6]. These Japanese versions were reported to be validated.<sup>16-20</sup>

We considered PCL-S score > 44 as indicating the presence of traumatic symptoms.<sup>16,17,21</sup> We regarded Kessler's K6 score  $\geq$  13 as indicating the presence of non-specific psychological distress.<sup>22-24</sup> Age was used as a categorical variable, defining three age groups (20-49, 50-64 and  $\geq$ 65 years). Education level was categorized as lower (high school or less) or higher (additional vocational college or junior college

1  
2  
3  
4  
5  
6 experience or higher).  
7  
8  
9

### 10 11 **Statistical analysis** 12

13  
14 The chi-square test was used to compare the smoking status before and after the disaster.  
15

16  
17 Disaster-related and socioeconomic variables were also compared among the categories  
18  
19 of change in the smoking status before and after the disaster using the chi-squared test.  
20  
21

22  
23 We examined the impact of demographic, disaster-related and psychosocial variables on  
24  
25 start smoking compared with continued non-smoking after the disaster among  
26  
27 non-smokers before the disaster. We also examined the impact of these variables on quit  
28  
29 smoking compared with continued smoking among smokers before the disaster.  
30  
31  
32

33  
34 Age- and sex-adjusted prevalence ratios (PRs) and 95% confidence intervals (CIs)  
35  
36 of the changes in smoking status for demographic, disaster-related and psychosocial  
37  
38 variables were calculated by logistic regression analysis. In the multivariable-adjusted  
39  
40 model, the adjustments were made for age (years), sex, and other related factors  
41  
42 estimated as statistically significant by the age- and sex-adjusted model. The potential  
43  
44 related factors were educational attainment, history of mental illness, living arrangement,  
45  
46 house damage, having experienced a tsunami, changes in jobs, becoming unemployed,  
47  
48 decreased income, presence of traumatic symptoms and non-specific psychological  
49  
50  
51  
52  
53  
54  
55  
56  
57  
58  
59  
60

1  
2  
3  
4  
5  
6 distress.

7  
8 Because the proportion of smokers was largely different between men and women,  
9  
10 we also conducted the multivariable analyses stratified by sex. P-values were obtained  
11  
12 by a two-tailed test and  $P < 0.05$  was regarded as statistically significant. All statistical  
13  
14 analyses were performed using software package SAS version 9.4 (SAS Institute Inc.,  
15  
16 Cary, NC, USA).  
17  
18  
19  
20  
21  
22  
23  
24

## 25 **Results**

26  
27  
28 The proportion of current smokers among a total of 58,754 men and women  
29  
30 significantly decreased from 23.9% to 22.3% after the disaster ( $P < 0.001$ ). The  
31  
32 corresponding proportion among men changed from 37.5% to 35.2% ( $P < 0.001$ ) and  
33  
34 that among women changed from 12.5% to 11.5% ( $P < 0.001$ ). Among the participants,  
35  
36 634 (1.1%) men and women started smoking and 1,564 (2.7%) men and women quit  
37  
38 smoking after the disaster. The corresponding proportions of starting and quitting  
39  
40 smoking were, respectively, 1.4% and 3.7% for men and 0.8% and 1.8% for women.  
41  
42  
43  
44  
45  
46  
47

48 Table 1 shows the participants' demographic, disaster-related and psychosocial  
49  
50 variables according to the categories of changes in smoking status, i.e. non-smokers,  
51  
52 starters, quitters and smokers The smoking starters showed the higher proportions than  
53  
54  
55  
56  
57  
58  
59  
60

1  
2  
3  
4  
5  
6 non-smokers as for the following categories: men, younger ages, rental house/apartment,  
7  
8 shelter living, house damage, history of mental illness, having experienced a tsunami,  
9  
10  
11 becoming unemployed, decreased income, traumatic symptoms and non-specific  
12  
13  
14 psychological distress.  
15

16  
17 Compared with smokers, quitters showed the higher proportion among the  
18  
19 categories of women, older ages, higher education, history of mental illness, having  
20  
21 experienced a tsunami and becoming unemployed, and a lower proportion among the  
22  
23 categories of shelter living, decreased income, traumatic symptoms and non-specific  
24  
25  
26  
27  
28  
29  
30  
31  
32  
33  
34  
35  
36  
37  
38  
39  
40  
41  
42  
43  
44  
45  
46  
47  
48  
49  
50  
51  
52  
53  
54  
55  
56  
57  
58  
59  
60

psychological distress.



**Table 1.** Demographic, disaster-related and psychosocial factors according to the categories of changes in smoking status among 58,754 men and women in the evacuation area.

|                                    | Total   |      | Non-smokers |      | Starters |      | P values | Smokers |      | Quitters |      | P values |
|------------------------------------|---------|------|-------------|------|----------|------|----------|---------|------|----------|------|----------|
|                                    | n       | %    | n           | %    | n        | %    |          | n       | %    | n        | %    |          |
| <b>Demographic characteristics</b> |         |      |             |      |          |      |          |         |      |          |      |          |
| <b>Sex</b>                         | n=58754 |      | n=44095     |      | n=634    |      |          | n=12461 |      | n=1564   |      |          |
| Men                                | 26764   | 45.6 | 16351       | 37.1 | 376      | 59.3 | <.0001   | 9040    | 72.5 | 997      | 63.7 | <.0001   |
| women                              | 31990   | 54.4 | 27744       | 62.9 | 258      | 40.7 |          | 3421    | 27.5 | 567      | 36.3 |          |
| <b>Age group</b>                   | n=58754 |      |             |      |          |      |          |         |      |          |      |          |
| Ages 20–49 years                   | 21479   | 36.6 | 13571       | 30.8 | 382      | 60.3 | <.0001   | 6727    | 54.0 | 799      | 51.1 | <.0001   |
| Ages 50–64 years                   | 18744   | 31.9 | 14136       | 32.1 | 147      | 23.2 |          | 4012    | 32.2 | 449      | 28.7 |          |
| Ages ≥65 years                     | 18531   | 31.5 | 16388       | 37.2 | 105      | 16.6 |          | 1722    | 13.8 | 316      | 20.2 |          |
| <b>Educational attainment</b>      | n=57076 |      |             |      |          |      |          |         |      |          |      |          |
| Primary or middle school           | 13383   | 23.4 | 10680       | 25.0 | 102      | 16.8 | <.0001   | 2329    | 19.1 | 272      | 17.7 | <.0001   |
| High school                        | 28331   | 49.6 | 20190       | 47.2 | 331      | 54.5 |          | 6986    | 57.2 | 824      | 53.8 |          |
| Vocational                         | 10127   | 17.7 | 7849        | 18.4 | 116      | 19.1 |          | 1883    | 15.4 | 279      | 18.2 |          |

|    |                           |         |      |       |      |     |      |        |      |      |     |      |        |
|----|---------------------------|---------|------|-------|------|-----|------|--------|------|------|-----|------|--------|
| 1  |                           |         |      |       |      |     |      |        |      |      |     |      |        |
| 2  |                           |         |      |       |      |     |      |        |      |      |     |      |        |
| 3  |                           |         |      |       |      |     |      |        |      |      |     |      |        |
| 4  |                           |         |      |       |      |     |      |        |      |      |     |      |        |
| 5  | college, or Junior        |         |      |       |      |     |      |        |      |      |     |      |        |
| 6  |                           |         |      |       |      |     |      |        |      |      |     |      |        |
| 7  | college                   |         |      |       |      |     |      |        |      |      |     |      |        |
| 8  |                           |         |      |       |      |     |      |        |      |      |     |      |        |
| 9  | University, or            |         |      |       |      |     |      |        |      |      |     |      |        |
| 10 |                           | 5235    | 9.2  | 4014  | 9.4  | 58  | 9.6  |        | 1005 | 8.2  | 158 | 10.3 |        |
| 11 | graduate school           |         |      |       |      |     |      |        |      |      |     |      |        |
| 12 |                           |         |      |       |      |     |      |        |      |      |     |      |        |
| 13 | <b>History of mental</b>  |         |      |       |      |     |      |        |      |      |     |      |        |
| 14 | <b>illness</b>            | n=57137 |      |       |      |     |      |        |      |      |     |      |        |
| 15 |                           |         |      |       |      |     |      |        |      |      |     |      |        |
| 16 | Yes                       | 3149    | 5.5  | 2332  | 5.4  | 60  | 9.9  | <.0001 | 662  | 5.5  | 95  | 6.2  | <.0001 |
| 17 |                           |         |      |       |      |     |      |        |      |      |     |      |        |
| 18 |                           |         |      |       |      |     |      |        |      |      |     |      |        |
| 19 |                           |         |      |       |      |     |      |        |      |      |     |      |        |
| 20 | <b>Disaster-related</b>   |         |      |       |      |     |      |        |      |      |     |      |        |
| 21 | <b>factors</b>            |         |      |       |      |     |      |        |      |      |     |      |        |
| 22 |                           |         |      |       |      |     |      |        |      |      |     |      |        |
| 23 |                           |         |      |       |      |     |      |        |      |      |     |      |        |
| 24 |                           |         |      |       |      |     |      |        |      |      |     |      |        |
| 25 | <b>Living</b>             |         |      |       |      |     |      |        |      |      |     |      |        |
| 26 | <b>arrangement</b>        | n=47099 |      |       |      |     |      |        |      |      |     |      |        |
| 27 |                           |         |      |       |      |     |      |        |      |      |     |      |        |
| 28 | Evacuation                |         |      |       |      |     |      |        |      |      |     |      |        |
| 29 |                           |         |      |       |      |     |      |        |      |      |     |      |        |
| 30 | shelter                   | 522     | 1.1  | 401   | 1.1  | 8   | 1.6  |        | 99   | 1.0  | 14  | 1.1  |        |
| 31 |                           |         |      |       |      |     |      |        |      |      |     |      |        |
| 32 | Temporary                 |         |      |       |      |     |      |        |      |      |     |      |        |
| 33 |                           |         |      |       |      |     |      |        |      |      |     |      |        |
| 34 | housing                   | 5343    | 11.3 | 3989  | 11.3 | 61  | 12.6 |        | 1164 | 11.6 | 129 | 10.3 |        |
| 35 |                           |         |      |       |      |     |      |        |      |      |     |      |        |
| 36 | Rental house or           |         |      |       |      |     |      |        |      |      |     |      |        |
| 37 | apartment                 | 19330   | 41.0 | 13654 | 38.7 | 270 | 55.7 | <.0001 | 4780 | 47.4 | 626 | 49.8 | <.0001 |
| 38 |                           |         |      |       |      |     |      |        |      |      |     |      |        |
| 39 | Relative's home           | 2127    | 4.5  | 1731  | 4.9  | 21  | 4.3  |        | 325  | 3.2  | 50  | 4.0  |        |
| 40 |                           |         |      |       |      |     |      |        |      |      |     |      |        |
| 41 | Own home                  | 17576   | 37.3 | 13862 | 39.3 | 101 | 20.8 |        | 3252 | 32.3 | 361 | 28.7 |        |
| 42 |                           |         |      |       |      |     |      |        |      |      |     |      |        |
| 43 | Others                    | 2201    | 4.7  | 1644  | 4.7  | 24  | 4.9  |        | 457  | 4.5  | 76  | 6.1  |        |
| 44 |                           |         |      |       |      |     |      |        |      |      |     |      |        |
| 45 |                           |         |      |       |      |     |      |        |      |      |     |      |        |
| 46 |                           |         |      |       |      |     |      |        |      |      |     |      |        |
| 47 | <b>Experienced living</b> |         |      |       |      |     |      |        |      |      |     |      |        |
| 48 | <b>in evacuation</b>      | n=58754 |      |       |      |     |      |        |      |      |     |      |        |
| 49 | <b>shelters</b>           |         |      |       |      |     |      |        |      |      |     |      |        |
| 50 |                           |         |      |       |      |     |      |        |      |      |     |      |        |
| 51 | Yes                       | 15865   | 27.0 | 11887 | 27.0 | 198 | 31.2 | <.0001 | 3365 | 27.0 | 415 | 26.5 | <.0001 |
| 52 |                           |         |      |       |      |     |      |        |      |      |     |      |        |
| 53 |                           |         |      |       |      |     |      |        |      |      |     |      |        |
| 54 |                           |         |      |       |      |     |      |        |      |      |     |      |        |
| 55 |                           |         |      |       |      |     |      |        |      |      |     |      |        |
| 56 |                           |         |      |       |      |     |      |        |      |      |     |      |        |
| 57 |                           |         |      |       |      |     |      |        |      |      |     |      |        |
| 58 |                           |         |      |       |      |     |      |        |      |      |     |      |        |
| 59 |                           |         |      |       |      |     |      |        |      |      |     |      |        |
| 60 |                           |         |      |       |      |     |      |        |      |      |     |      |        |

|    |                        |         |      |      |      |     |      |        |      |      |     |      |        |
|----|------------------------|---------|------|------|------|-----|------|--------|------|------|-----|------|--------|
| 1  |                        |         |      |      |      |     |      |        |      |      |     |      |        |
| 2  |                        |         |      |      |      |     |      |        |      |      |     |      |        |
| 3  |                        |         |      |      |      |     |      |        |      |      |     |      |        |
| 4  |                        |         |      |      |      |     |      |        |      |      |     |      |        |
| 5  | <b>House damage</b>    | n=58754 |      |      |      |     |      |        |      |      |     |      |        |
| 6  |                        |         |      |      |      |     |      |        |      |      |     |      |        |
| 7  | Yes                    | 8706    | 14.8 | 6528 | 14.8 | 134 | 21.1 | <.0001 | 1812 | 14.5 | 232 | 14.8 | <.0001 |
| 8  |                        |         |      |      |      |     |      |        |      |      |     |      |        |
| 9  |                        |         |      |      |      |     |      |        |      |      |     |      |        |
| 10 | <b>Experience of</b>   |         |      |      |      |     |      |        |      |      |     |      |        |
| 11 | <b>disaster</b>        |         |      |      |      |     |      |        |      |      |     |      |        |
| 12 |                        |         |      |      |      |     |      |        |      |      |     |      |        |
| 13 | <b>disaster</b>        |         |      |      |      |     |      |        |      |      |     |      |        |
| 14 | Having                 |         |      |      |      |     |      |        |      |      |     |      |        |
| 15 |                        |         |      |      |      |     |      |        |      |      |     |      |        |
| 16 | experienced a          | n=58754 |      |      |      |     |      |        |      |      |     |      |        |
| 17 |                        |         |      |      |      |     |      |        |      |      |     |      |        |
| 18 | tsunami                |         |      |      |      |     |      |        |      |      |     |      |        |
| 19 |                        |         |      |      |      |     |      |        |      |      |     |      |        |
| 20 | Yes                    | 11807   | 20.1 | 8559 | 19.4 | 176 | 27.8 | <.0001 | 2747 | 22.0 | 325 | 20.8 | <.0001 |
| 21 |                        |         |      |      |      |     |      |        |      |      |     |      |        |
| 22 |                        |         |      |      |      |     |      |        |      |      |     |      |        |
| 23 | <b>Psychosocial</b>    |         |      |      |      |     |      |        |      |      |     |      |        |
| 24 | <b>factors</b>         |         |      |      |      |     |      |        |      |      |     |      |        |
| 25 |                        |         |      |      |      |     |      |        |      |      |     |      |        |
| 26 | <b>factors</b>         |         |      |      |      |     |      |        |      |      |     |      |        |
| 27 | Changes in jobs        | n=58754 |      |      |      |     |      |        |      |      |     |      |        |
| 28 |                        |         |      |      |      |     |      |        |      |      |     |      |        |
| 29 | Yes                    | 2542    | 4.3  | 1599 | 3.6  | 56  | 8.8  | <.0001 | 798  | 6.4  | 89  | 5.7  | <.0001 |
| 30 |                        |         |      |      |      |     |      |        |      |      |     |      |        |
| 31 |                        |         |      |      |      |     |      |        |      |      |     |      |        |
| 32 | Becoming               |         |      |      |      |     |      |        |      |      |     |      |        |
| 33 |                        |         |      |      |      |     |      |        |      |      |     |      |        |
| 34 | unemployed             | n=58754 |      |      |      |     |      |        |      |      |     |      |        |
| 35 |                        |         |      |      |      |     |      |        |      |      |     |      |        |
| 36 | Yes                    | 12255   | 20.9 | 8643 | 19.6 | 172 | 27.1 | <.0001 | 3016 | 24.2 | 424 | 27.1 | <.0001 |
| 37 |                        |         |      |      |      |     |      |        |      |      |     |      |        |
| 38 |                        |         |      |      |      |     |      |        |      |      |     |      |        |
| 39 | Decreased              |         |      |      |      |     |      |        |      |      |     |      |        |
| 40 |                        |         |      |      |      |     |      |        |      |      |     |      |        |
| 41 | Income                 | n=58754 |      |      |      |     |      |        |      |      |     |      |        |
| 42 |                        |         |      |      |      |     |      |        |      |      |     |      |        |
| 43 | Yes                    | 11141   | 19.0 | 7548 | 17.1 | 145 | 22.9 | <.0001 | 3117 | 25.0 | 331 | 21.2 | <.0001 |
| 44 |                        |         |      |      |      |     |      |        |      |      |     |      |        |
| 45 |                        |         |      |      |      |     |      |        |      |      |     |      |        |
| 46 | <b>Presence of</b>     |         |      |      |      |     |      |        |      |      |     |      |        |
| 47 | <b>traumatic</b>       |         |      |      |      |     |      |        |      |      |     |      |        |
| 48 | <b>symptoms(PCL-S)</b> |         |      |      |      |     |      |        |      |      |     |      |        |
| 49 |                        |         |      |      |      |     |      |        |      |      |     |      |        |
| 50 |                        | n=58754 |      |      |      |     |      |        |      |      |     |      |        |
| 51 | <b>&gt;=44</b>         |         |      |      |      |     |      |        |      |      |     |      |        |
| 52 |                        |         |      |      |      |     |      |        |      |      |     |      |        |
| 53 |                        |         |      |      |      |     |      |        |      |      |     |      |        |
| 54 | Yes                    | 12266   | 20.9 | 9247 | 21.0 | 210 | 33.1 | <.0001 | 2515 | 20.2 | 294 | 18.8 | <.0001 |
| 55 |                        |         |      |      |      |     |      |        |      |      |     |      |        |
| 56 |                        |         |      |      |      |     |      |        |      |      |     |      |        |
| 57 |                        |         |      |      |      |     |      |        |      |      |     |      |        |
| 58 |                        |         |      |      |      |     |      |        |      |      |     |      |        |
| 59 |                        |         |      |      |      |     |      |        |      |      |     |      |        |
| 60 |                        |         |      |      |      |     |      |        |      |      |     |      |        |

1  
2  
3  
4  
5  
6  
7  
8  
9  
10  
11  
12  
13  
14  
15  
16  
17  
18  
19  
20  
21  
22  
23  
24  
25  
26  
27  
28  
29  
30  
31  
32  
33  
34  
35  
36  
37  
38  
39  
40  
41  
42  
43  
44  
45  
46  
47  
48  
49  
50  
51  
52  
53  
54  
55  
56  
57  
58  
59  
60

**Presence of  
non-specific  
mental  
illness(K6)>=13**

n=58754

|     |      |      |      |      |     |      |        |      |      |     |      |        |
|-----|------|------|------|------|-----|------|--------|------|------|-----|------|--------|
| Yes | 8556 | 14.0 | 6337 | 14.4 | 157 | 24.8 | <.0001 | 1853 | 14.9 | 209 | 13.4 | <.0001 |
|-----|------|------|------|------|-----|------|--------|------|------|-----|------|--------|

For peer review only

1  
2  
3  
4  
5  
6 Table 2 indicates age- and sex-adjusted PRs and 95% CIs for the group that start  
7  
8 smoking after the disaster according to demographic, disaster-related and psychosocial  
9  
10 factors among 44,729 smokers before the disaster. The corresponding age- and  
11  
12 sex-adjusted PRs (95% CIs) were 2.91 (2.48–3.42) for men, 5.17 (4.15–6.43) for ages  
13  
14 20–49 years, 1.74 (1.35–2.23) for ages 50–64 years, 0.68 (0.57–0.82) for higher  
15  
16 education (junior college and higher), 2.03 (1.54–2.67) for history of mental illness,  
17  
18 1.46 (1.10–1.93) for living in a temporary housing, 1.38 (1.16–1.64) for living in a  
19  
20 rental housing/apartment, 1.64 (1.35–1.99) for house damage, 1.57 (1.32–1.88) for  
21  
22 having experienced a tsunami, 1.57 (1.18–2.08) for changes in jobs, 1.53 (1.28–1.83)  
23  
24 for becoming unemployed, 1.18 (0.97–1.42) for decreased Income, 2.38 (2.01–2.83) for  
25  
26 presence of traumatic symptoms and 2.26 (1.88–2.72) for presence of non-specific  
27  
28 mental illness.  
29  
30  
31  
32  
33  
34  
35  
36  
37  
38

39 Age- and sex-adjusted and multivariable-adjusted PRs and 95% CIs of start  
40  
41 smoking after the disaster according to demographic, disaster-related and psychosocial  
42  
43 factors among 44,729 non-smokers before the disaster. The corresponding  
44  
45 multivariable-adjusted PRs (95% CIs) were 3.01 (2.55–3.55) for men, 5.55 (4.40–7.00)  
46  
47 for ages 20–49 years, 1.81 (1.40–2.33) for ages 50–64 years, 0.69 (0.57–0.83) for higher  
48  
49 education (junior college and higher) , 1.45 (1.09–1.93) for history of mental illness,  
50  
51  
52  
53  
54  
55  
56  
57  
58  
59  
60

1  
2  
3  
4  
5  
6 1.33 (1.12–1.58) for living in a rental housing/apartment, 1.24 (1.01–1.50) for house  
7  
8 damaged, 1.29 (1.07–1.55) for having experienced a tsunami, 1.41 (1.05–1.89) for  
9  
10 changes in jobs, 1.19 (0.99–1.43) for becoming unemployed, 1.70 (1.37–2.11) for  
11  
12 presence of traumatic symptoms and 1.38 (1.09–1.75) for presence of non-specific  
13  
14 mental illness. These associations did not differ substantially between men and women  
15  
16 (Supplemental Table 1).  
17  
18  
19  
20  
21

22  
23 Age- and sex-adjusted and multivariable-adjusted PRs and 95% CIs of start  
24  
25 smoking after the disaster according to demographic, disaster-related and psychosocial  
26  
27 factors among 44,729 non-smokers before the disaster. The corresponding  
28  
29 multivariable-adjusted PRs (95% CIs) were 3.01 (2.55–3.55) for men, 5.55 (4.40–7.00)  
30  
31 for ages 20–49 years, 1.81 (1.40–2.33) for ages 50–64 years, 0.69 (0.57–0.83) for higher  
32  
33 education (junior college and higher) , 1.45 (1.09–1.93) for history of mental illness,  
34  
35 1.33 (1.12–1.58) for living in a rental housing/apartment, 1.24 (1.01–1.50) for house  
36  
37 damaged, 1.29 (1.07–1.55) for having experienced a tsunami, 1.41 (1.05–1.89) for  
38  
39 changes in jobs, 1.19 (0.99–1.43) for becoming unemployed, 1.70 (1.37–2.11) for  
40  
41 presence of traumatic symptoms and 1.38 (1.09–1.75) for presence of non-specific  
42  
43 mental illness. These associations did not differ substantially between men and women  
44  
45 (Supplemental Table 1).  
46  
47  
48  
49  
50  
51  
52  
53  
54  
55  
56  
57  
58  
59  
60

**TABLE 2.** Age- and sex-adjusted prevalence ratios (PRs) and 95% confidence intervals of start smoking after the disaster according to geographical, disaster-related and psychosocial factors among 44,729 non-smokers before the disaster.

| Model                                                               | Age- and sex-adjusted model |             |          | Multivariable-adjusted model <sup>#</sup> |             |          |
|---------------------------------------------------------------------|-----------------------------|-------------|----------|-------------------------------------------|-------------|----------|
|                                                                     | PR                          | (95%CI)     | P values | PR                                        | (95%CI)     | P values |
| n=44729                                                             |                             |             |          |                                           |             |          |
| <b>Demographic characteristics</b>                                  |                             |             |          |                                           |             |          |
| Men(versus women)*                                                  | 2.91                        | 2.48 - 3.42 | <.0001   | 3.01                                      | 2.55 - 3.55 | <.0001   |
| <b>Age group**</b>                                                  |                             |             |          |                                           |             |          |
| Ages 20-49 years                                                    | 5.17                        | 4.15 - 6.43 | <.0001   | 5.55                                      | 4.40 - 7.00 | <.0001   |
| Ages 50-64 years                                                    | 1.74                        | 1.35 - 2.23 | <.0001   | 1.81                                      | 1.40 - 2.33 | <.0001   |
| Ages ≥65 years (Ref.)                                               | 1.00                        |             |          | 1.00                                      |             |          |
| <b>Educational attainment</b>                                       |                             |             |          |                                           |             |          |
| Vocational college, junior college or more (versus lower education) | 0.68                        | 0.57 - 0.82 | <.0001   | 0.69                                      | 0.57 - 0.83 | <.0001   |
| <b>History of mental illness</b>                                    |                             |             |          |                                           |             |          |
| Yes(versus No)                                                      | 2.03                        | 1.54 - 2.67 | <.0001   | 1.45                                      | 1.09 - 1.93 | 0.010    |
| <b>Disaster-related factors</b>                                     |                             |             |          |                                           |             |          |
| <b>Living arrangement</b>                                           |                             |             |          |                                           |             |          |
| Evacuation Shelter                                                  | 1.53                        | 0.75 - 3.13 | 0.246    | 1.36                                      | 0.66 - 2.78 | 0.409    |
| Temporary housing                                                   | 1.46                        | 1.10 - 1.93 | 0.009    | 1.25                                      | 0.94 - 1.66 | 0.127    |
| Rental housing or apartment                                         | 1.38                        | 1.16 - 1.64 | <.001    | 1.33                                      | 1.12 - 1.58 | 0.001    |
| Relative's home                                                     | 1.18                        | 0.75 - 1.85 | 0.467    | 1.14                                      | 0.72 - 1.78 | 0.580    |

|    |                                 |      |             |        |  |      |             |        |  |
|----|---------------------------------|------|-------------|--------|--|------|-------------|--------|--|
| 1  |                                 |      |             |        |  |      |             |        |  |
| 2  |                                 |      |             |        |  |      |             |        |  |
| 3  |                                 |      |             |        |  |      |             |        |  |
| 4  |                                 |      |             |        |  |      |             |        |  |
| 5  | Own home (Ref.)                 | 1.00 |             |        |  | 1.00 |             |        |  |
| 6  |                                 |      |             |        |  |      |             |        |  |
| 7  |                                 |      |             |        |  |      |             |        |  |
| 8  | <b>House damage</b>             |      |             |        |  |      |             |        |  |
| 9  |                                 | 1.64 | 1.35 - 1.99 | <.0001 |  | 1.24 | 1.01 - 1.50 | 0.038  |  |
| 10 | Yes(versus No)                  |      |             |        |  |      |             |        |  |
| 11 |                                 |      |             |        |  |      |             |        |  |
| 12 | <b>Experience of disaster</b>   |      |             |        |  |      |             |        |  |
| 13 |                                 |      |             |        |  |      |             |        |  |
| 14 | Having experienced a tsunami    |      |             |        |  |      |             |        |  |
| 15 |                                 | 1.57 | 1.32 - 1.88 | <.0001 |  | 1.29 | 1.07 - 1.55 | 0.008  |  |
| 16 | Yes(versus No)                  |      |             |        |  |      |             |        |  |
| 17 |                                 |      |             |        |  |      |             |        |  |
| 18 |                                 |      |             |        |  |      |             |        |  |
| 19 | <b>Psychosocial factors</b>     |      |             |        |  |      |             |        |  |
| 20 |                                 |      |             |        |  |      |             |        |  |
| 21 | Changes in jobs                 |      |             |        |  |      |             |        |  |
| 22 |                                 | 1.57 | 1.18 - 2.08 | 0.002  |  | 1.41 | 1.05 - 1.89 | 0.023  |  |
| 23 | Yes(versus No)                  |      |             |        |  |      |             |        |  |
| 24 | Becoming unemployed             |      |             |        |  |      |             |        |  |
| 25 |                                 | 1.53 | 1.28 - 1.83 | <.0001 |  | 1.19 | 0.99 - 1.43 | 0.064  |  |
| 26 | Yes(versus No)                  |      |             |        |  |      |             |        |  |
| 27 |                                 |      |             |        |  |      |             |        |  |
| 28 | Decreased Income                |      |             |        |  |      |             |        |  |
| 29 |                                 | 1.18 | 0.97 - 1.42 | 0.092  |  |      |             |        |  |
| 30 | Yes(versus No)                  |      |             |        |  |      |             |        |  |
| 31 |                                 |      |             |        |  |      |             |        |  |
| 32 | Presence of traumatic           |      |             |        |  |      |             |        |  |
| 33 |                                 |      |             |        |  |      |             |        |  |
| 34 | symptoms(PCL-S)                 | 2.38 | 2.01 - 2.83 | <.0001 |  | 1.70 | 1.37 - 2.11 | <.0001 |  |
| 35 |                                 |      |             |        |  |      |             |        |  |
| 36 | ≥44(versus ≤43)                 |      |             |        |  |      |             |        |  |
| 37 |                                 |      |             |        |  |      |             |        |  |
| 38 | Presence of non-specific mental |      |             |        |  |      |             |        |  |
| 39 |                                 |      |             |        |  |      |             |        |  |
| 40 | illness(K6)                     | 2.26 | 1.88 - 2.72 | <.0001 |  | 1.38 | 1.09 - 1.75 | 0.007  |  |
| 41 |                                 |      |             |        |  |      |             |        |  |
| 42 | ≥13(versus ≤12)                 |      |             |        |  |      |             |        |  |
| 43 |                                 |      |             |        |  |      |             |        |  |
| 44 |                                 |      |             |        |  |      |             |        |  |

---

\*Age-Adjusted

\*\*Sex-Adjusted

#Adjusted for age and sex, and educational attainment, history of mental illness, living arrangement, house damage, having experienced a tsunami, changes in jobs, becoming unemployed, decreased Income, presence of traumatic symptoms and presence of non-specific mental illness except for the variable of interest.



1  
2  
3  
4  
5  
6 Table 3 indicates age- and sex-adjusted PRs and 95% CIs of quit smoking after the  
7  
8 disaster according to demographic, disaster-related and psychosocial factors among  
9  
10 14,025 smokers before the disaster. Age- and sex-adjusted PRs (95% CIs) were 0.63  
11  
12 (0.56–0.71) for men, 0.58 (0.50–0.66) for 20–49 years, 0.59 (0.50–0.68) for 50–64  
13  
14 years, 1.32 (1.17–1.49) for higher education , 0.85 (0.75–0.97) for decreased Income,  
15  
16 0.85 (0.74–0.97) for presence of traumatic symptoms and 0.83 (0.71–0.97) for presence  
17  
18 of non-specific mental illness.  
19  
20  
21  
22  
23  
24

25 The corresponding multivariable-adjusted PRs (95% CIs) were 0.63 (0.56–0.71)  
26  
27 for men, 0.53 (0.46–0.62) for 20–49 years, 0.57 (0.48–0.66) for 50–64 years and 1.31  
28  
29 (1.16–1.47) for higher education, 0.89 (0.76–0.98) for decreased Income, 0.89 (0.76–  
30  
31 1.05) for presence of traumatic symptoms and 0.89 (0.74–1.07) for presence of  
32  
33 non-specific mental illness. These associations did not differ substantially between men  
34  
35 and women (Supplemental Table 2)  
36  
37  
38  
39  
40  
41  
42  
43  
44  
45  
46  
47  
48  
49  
50  
51  
52  
53  
54  
55  
56  
57  
58  
59  
60

**TABLE 3.** Age- and sex-adjusted prevalence ratios (PRs) and 95% confidence intervals of quit smoking after the disaster according to geographical, disaster-related and psychosocial factors among 14,025 smokers before the disaster.

| Model                                                                  | Age- and sex-adjusted model |             |          | Multivariable-adjusted model <sup>#</sup> |             |          |
|------------------------------------------------------------------------|-----------------------------|-------------|----------|-------------------------------------------|-------------|----------|
|                                                                        | PR                          | (95%CI)     | P values | PR                                        | (95%CI)     | P values |
| n=14025                                                                |                             |             |          |                                           |             |          |
| <b>Demographic characteristics</b>                                     |                             |             |          |                                           |             |          |
| Men(versus women)*                                                     | 0.63                        | 0.56 - 0.71 | <.0001   | 0.63                                      | 0.56 - 0.71 | <.0001   |
| <b>Age group**</b>                                                     |                             |             |          |                                           |             |          |
| Ages 20-49 years                                                       | 0.58                        | 0.50 - 0.66 | <.0001   | 0.53                                      | 0.46 - 0.62 | <.0001   |
| Ages 50-64 years                                                       | 0.59                        | 0.50 - 0.68 | <.0001   | 0.57                                      | 0.48 - 0.66 | <.0001   |
| Ages ≥65 years (Ref.)                                                  | 1.00                        |             |          | 1.00                                      |             |          |
| <b>Educational attainment</b>                                          |                             |             |          |                                           |             |          |
| Vocational college, junior college or more<br>(versus lower education) | 1.32                        | 1.17 - 1.49 | <.0001   | 1.31                                      | 1.16 - 1.47 | <.0001   |
| <b>History of mental illness</b>                                       |                             |             |          |                                           |             |          |
| Yes(versus No)                                                         | 1.09                        | 0.87 - 1.37 | 0.436    |                                           |             |          |
| <b>Disaster-related factors</b>                                        |                             |             |          |                                           |             |          |
| <b>Living arrangement</b>                                              |                             |             |          |                                           |             |          |
| Evacuation Shelter                                                     | 1.16                        | 0.66 - 2.04 | 0.613    | 1.20                                      | 0.68 - 2.12 | 0.537    |
| Temporary housing                                                      | 0.90                        | 0.74 - 1.10 | 0.314    | 0.95                                      | 0.78 - 1.16 | 0.614    |
| Rental housing or apartment                                            | 1.09                        | 0.97 - 1.22 | 0.146    | 1.12                                      | 1.00 - 1.25 | 0.061    |
| Relative's home                                                        | 1.24                        | 0.91 - 1.68 | 0.180    | 1.20                                      | 0.88 - 1.63 | 0.256    |
| Own home (Ref.)                                                        | 1.00                        |             |          | 1.00                                      |             |          |

1  
2  
3  
4  
5  
6  
7  
8  
9  
10  
11  
12  
13  
14  
15  
16  
17  
18  
19  
20  
21  
22  
23  
24  
25  
26  
27  
28  
29  
30  
31  
32  
33  
34  
35  
36  
37  
38  
39  
40  
41  
42  
43  
44  
45  
46  
47  
48  
49  
50  
51  
52  
53  
54  
55  
56  
57  
58  
59  
60

**House damage**

1.03 0.89 - 1.19 0.705

Yes(versus No)

**Experience of disaster**

Having experienced a tsunami

0.97 0.85 - 1.11 0.652

Yes(versus No)

**Psychosocial factors**

Changes in jobs

0.94 0.75 - 1.18 0.594

Yes(versus No)

Becoming unemployed

1.09 0.96 - 1.23 0.171

Yes(versus No)

Decreased Income

0.85 0.75 - 0.97 0.012 0.86 0.75 - 0.98 0.019

Yes(versus No)

Presence of traumatic symptoms(PCL-S)

0.85 0.74 - 0.97 0.016 0.89 0.76 - 1.05 0.160

≥44(versus ≤43)

Presence of non-specific mental

illness(K6) 0.83 0.71 - 0.97 0.022 0.89 0.74 - 1.07 0.209

≥13(versus ≤12)

\*Age-Adjusted

\*\*Sex-Adjusted

#Adjusted for age and sex, and educational attainment, living arrangement, decreased Income, presence of traumatic symptoms and presence of non-specific mental illness except for the variable of interest.

## Discussion

One of the main findings from the present study is that the proportion of smokers decreased slightly among men and women aged  $\geq 20$  years in the evacuation area from 23.9% to 22.3% at 10 to 20 months after the March 2011 earthquake and the subsequent disastrous tsunami and nuclear power plant accident. The proportion of persons who quit smoking was higher than that of those who started smoking: 3.7% and 1.4% among men and 1.8% and 0.8% among women, respectively.

By contrast, previous studies have reported that the proportion of current smokers increased after a disaster: from 34.4% to 52.5% amongst men and women one year after Hurricane Katrina<sup>8</sup> and from 22.6% to 23.4% amongst men and women aged  $\geq 18$  years 6 months after the terrorist attacks in Manhattan on September 11th, 2001.<sup>9</sup>

In the present study, we found that factors associated with quitting smoking were being a female, older age, having a higher education and having a stable income. Conversely, the factors associated with initiating smoking included being a male, younger age, having a lower education, staying in a rental house/apartment, experiencing damage to one's house, having experienced a tsunami, changes in jobs, the presence of traumatic symptoms and non-specific psychological distress. Our results on traumatic symptoms and non-specific psychological distress were consistent with

1  
2  
3  
4  
5  
6 findings from previous studies on Hurricane Katrina, the September 11th terrorist  
7  
8 attacks and the Canterbury Great Earthquake; these studies all showed that  
9  
10  
11 post-traumatic stress disorder (PTSD) was a major factor for initiating smoking.<sup>6,7,9</sup>  
12  
13  
14 Therefore, the management of PTSD might help prevent some individuals from  
15  
16  
17 initiating smoking.  
18  
19

20 The National Health Nutrition Survey in Japan reported that the proportion of  
21  
22 smokers in Japan before and after the disaster increased slightly from 19.5% (95% CI,  
23  
24 20.0 to 20.9%) in 2010 to 20.7% (95% CI, 18.6 to 20.3%) in 2012.<sup>25</sup> One reason for the  
25  
26 slight decrease in the proportion of current smokers in Fukushima after the disaster may  
27  
28 be the decreased access to tobacco products. The earthquake damaged tobacco  
29  
30 plantations, ceasing tobacco production and disrupting railway and road transportation  
31  
32 networks in the areas damaged by the earthquake. Tobacco distribution stagnated after  
33  
34 the disaster. According to a press release by Japan Tobacco Inc., the total cigarette sales  
35  
36 volume in April 2011 decreased by 81.8% compared to April 2010, and domestic  
37  
38 cigarette sales decreased by 74.8%. Furthermore, the cigarette sales volume between  
39  
40 April and September 2011 decreased by 41.2% and the tobacco sales volume decreased  
41  
42 by 20.4% compared to the same period the previous year.<sup>26</sup> These situations likely  
43  
44 contributed to quitting smoking after the disaster in Fukushima.  
45  
46  
47  
48  
49  
50  
51  
52  
53  
54  
55  
56  
57  
58  
59  
60

1  
2  
3  
4  
5  
6  
7  
8  
9  
10  
11  
12  
13  
14  
15  
16  
17  
18  
19  
20  
21  
22  
23  
24  
25  
26  
27  
28  
29  
30  
31  
32  
33  
34  
35  
36  
37  
38  
39  
40  
41  
42  
43  
44  
45  
46  
47  
48  
49  
50  
51  
52  
53  
54  
55  
56  
57  
58  
59  
60

Although the proportion of current smokers decreased slightly among the evacuees after the disaster, the proportion of current smokers was still higher in the evacuation area than in other areas of Japan. In the present study, the proportion of current smokers was 22.3% (35.2% men and 11.5% women), while the corresponding proportion in the national sample was 20.1% (32.4% men and 9.7% women) in 2012.<sup>27</sup>

The strengths of this survey lie in its size and procedures, as it involved a large-scale survey to complete an inventory-based analysis of evacuees following the earthquake.

The present study has several limitations. First, we investigated smoking status before and after the earthquake using a self-reported questionnaire administered after the disaster that involved a cross-sectional study design; this may have led to recall bias. Second, we did not assess the number of cigarettes smoked amongst current smokers, and thus we could not examine dose-response relationships. Third, because the response rate in the present study was relatively low (41%), the representativeness of target populations was uncertain. Furthermore, if non-responders tended to be smokers or beginning smokers, the proportion of smokers after the disaster could be underestimated. Lastly, there were no data from non-disaster exposed areas for comparison, except for

1  
2  
3  
4  
5  
6 national data on the prevalence of smoking.  
7

8  
9 In conclusion, The proportion of smokers decreased slightly amongst residents in  
10  
11 the evacuation area. The changes in smoking status were associated with disaster-related  
12  
13 psychosocial factors, particularly changes in living conditions, having experienced a  
14  
15 tsunami, changes in jobs and post-traumatic stress disorder. A long-term follow-up study  
16  
17 is necessary to examine the effects of disaster-related factors on smoking status amongst  
18  
19  
20  
21  
22  
23 evacuees.  
24  
25  
26  
27  
28  
29  
30  
31  
32  
33  
34  
35  
36  
37  
38  
39  
40  
41  
42  
43  
44  
45  
46  
47  
48  
49  
50  
51  
52  
53  
54  
55  
56  
57  
58  
59  
60

### **Acknowledgements**

The authors would like to express their sincere appreciation for the support extended to them by the chairpersons, expert committee members, advisors and staff of the Fukushima Health Management Survey Group.

### **Contributors**

HN, TO and HI contributed to the design of the present study. TO, SY, AO, MM, MH, NH, YS, HY and HT were responsible for data collection and overseeing study procedures. The analysis was conducted by HN. The manuscript was written by HN. TO, SY, AO, MM, MH, NH, YS, HY, HT, MN, WZ, HI and KK made significant contributions to the critical interpretation of the results in terms of important practical content. All the authors read and approved the final version of the manuscript.

### **Competing interests**

None declared

### **Funding**

This survey was conducted as part of Fukushima Prefecture's post-disaster recovery plans and was supported by the "National Health Fund for Children and Adults Affected by the Nuclear Incident".

### **Data sharing statement**

No additional data are available.



## References

1. Yasumura S, Hosoya M, Yamashita S, et al. Study protocol for the Fukushima Health Management Survey. *J Epidemiol.* 2012;**22**:375-383.
2. Situation of the evacuation area and support for the victims in Fukushima. [cited 2017 May]. Available from: <http://www.pref.fukushima.lg.jp/site/portal/list271.html>. (accessed 31 May 2017).
3. Yabe H, Suzuki Y, Mashiko H, et al. Psychological distress after the Great East Japan Earthquake and Fukushima Daiichi Nuclear Power Plant accident: results of a mental health and lifestyle survey through the Fukushima Health Management Survey in FY2011 and FY2012. *Fukushima J Med Sci.* 2014;**60**:57-67.
4. Ansell EB, Gu P, Tuit K, et al. Effects of cumulative stress and impulsivity on smoking status. *Human Psychopharmacology.* 2012;**27**:200-208.
5. Vlahov D, Galea S, Resnick H, et al. Increased use of cigarettes, alcohol, and marijuana among Manhattan, New York, residents after the September 11th terrorist attacks. *Am J Epidemiol.* 2002;**155**:988-996.
6. Beaudoin CE. Hurricane Katrina: addictive behavior trends and predictors. *Public Health Rep.* 2011;**126**:400-409.

- 1  
2  
3  
4  
5  
6 7. Flory K, Hankin BL, Kloos B, et al. Alcohol and cigarette use and misuse among  
7  
8 Hurricane Katrina survivors: psychosocial risk and protective factors. *Subst Use Misuse*.  
9  
10  
11 2009;**44**:1711-1724.  
12
- 13  
14 8. Matthew N. Peters, John C. Moscona, Morgan J. Katz, et al. Natural Disasters and  
15  
16 Myocardial Infarction : The Six Years After Hurricane Katrina. *Mayo Clin Proc*.  
17  
18 2014;**89**(4):472-477  
19
- 20  
21 9. Erskine N, Daley V, Stevenson S, et al. Smoking prevalence increases following  
22  
23 Canterbury earthquakes. *The Sci World J*. 2013,596957.  
24  
25
- 26  
27 10. Naoi K, Local mental health activity after the Nligata-ken Chuetsu Earthquake :  
28  
29 Findngs of investigations performed three and a half months and thirteen months after  
30  
31 the eartihquake, and analysis about the risk factor of PTSD. *Jap Bull Soc Psychiatry*  
32  
33 2009;**18**:52-62.  
34  
35
- 36  
37 11. Vlahov D, Galea S, Ahern J, et al. Increased Use of Cigarettes, Alcohol, and  
38  
39 Marijuana among Manhattan, New York, Residents after the September 11th Terrorist  
40  
41 Attacks. *American Journal of Epidemiology*. 2002;**155**,988-966.  
42  
43  
44
- 45  
46 12. Ohira T, Hosoya M, Yasumura S, et al. Effect of evacuation on body weight after the  
47  
48 Great East Japan Earthquake. *Am J Prev Med*. 2016;**50**:553-560.  
49  
50  
51  
52  
53  
54  
55  
56  
57  
58  
59  
60

- 1  
2  
3  
4  
5  
6 13. Satoh H, Ohira T, Nagai M, et al. Hypo- high-density lipoprotein cholesterolemia is  
7  
8 caused by evacuation after the Fukushima Daiichi Nuclear Power Plant accident:  
9  
10 Results from the Fukushima Health Management Survey. *Intern Med.* 2016;**55**:1967-  
11  
12 76.  
13  
14  
15  
16  
17 14. Sakai A, Ohira T, Hosoya M, et al. Life as an evacuee after the Fukushima Daiichi  
18  
19 nuclear power plant accident is a cause of polycythemia: the Fukushima Health  
20  
21 Management Survey. *BMC Public Health.* 2014;**14**:1318.  
22  
23  
24  
25  
26 15. Suzuki H, Ohira T, Takeishi Y, et al. Increased prevalence of atrial fibrillation after  
27  
28 the Great East Japan Earthquake: Results from the Fukushima Health Management  
29  
30 Survey. *Int J Cardiol.* 2015;**198**:102-105.  
31  
32  
33  
34 16. Iwasa H, Suzuki Y, Shiga T, et al. Psychometric Evaluation of the Japanese Version  
35  
36 of the Posttraumatic Stress Disorder Checklist in Community Dwellers Following the  
37  
38 Fukushima Daiichi Nuclear Power Plant Incident-The Fukushima Health Management  
39  
40 Survey. *SAGE Open* Jun 2016, 6 (2) 2158244016652444; DOI:  
41  
42 10.1177/2158244016652444  
43  
44  
45  
46  
47  
48 17. Suzuki Y, Yabe H, Horikoshi N, et al. Diagnostic accuracy of Japanese posttraumatic  
49  
50 stress measures after a complex disaster: The Fukushima Health Management Survey.  
51  
52  
53  
54 *Asia Pac Psychiatry.* 2016 Aug 9. doi: 10.1111/appy.12248.  
55  
56  
57  
58  
59  
60

- 1  
2  
3  
4  
5  
6 18. Furukawa TA, Kawakami N, Saitoh M, et al. The performance of the Japanese  
7  
8 version of the K6 and K10 in the World Mental Health Survey Japan. *Int J Methods*  
9  
10  
11 *Psychiatr Res* 2008;**17**:152-158.
- 12  
13  
14 19. Kessler RC, Barker PR, Colpe LJ, et al. Screening for serious mental illness in the  
15  
16 general population. *Arch Gen Psychiatry* 2003;**60**:184-189.
- 17  
18  
19 20. Kessler RC, Green JG, Gruber MJ, et al. Screening for serious mental illness in the  
20  
21 general population with the K6 screening scale: results from the WHO World Mental  
22  
23 Health (WMH) survey initiative. *Int J Methods Psychiatr Res* 2010;**19**:4-22.
- 24  
25  
26 21. Blanchard EB, Jones-Alexander J, Buckley TC, et al. Psychometric properties of the  
27  
28 PTSD Checklist (PCL). *Behaviour Research and Therapy*, 1996;**34**:669-673. doi:  
29  
30 10.1016/0005-7967(96)00033-2
- 31  
32  
33 22. Ronald CK, Sandro G, Russell TJ, et al. Mental illness and suicidality after  
34  
35 Hurricane Katrina. *Bull World Health Organ* 2006;**84**:930-939.
- 36  
37  
38 23. Galea S, Brewin CR, Gruber M, et al. Exposure to hurricane-related stressors and  
39  
40 mental illness after Hurricane Katrina. *Arch Gen Psychiatry* 2007;**64**:1427-1434.
- 41  
42  
43 24. Ruth A. Parslow & Anthony F. Jorm. Tobacco use after experiencing a major natural  
44  
45 disaster: analysis of a longitudinal study of 2063 young adults.  
46  
47 doi:10.1111/j.1360-0443.2006.01481.x ADDITION 101,1044-1050.
- 48  
49  
50  
51  
52  
53  
54  
55  
56  
57  
58  
59  
60

1  
2  
3  
4  
5  
6 25. Cancer Registry and Statistics. Cancer Information Service, National Cancer Center,

7  
8 Japan., Pref\_Smoking\_Rate (2001-2013). Available from:

9  
10  
11 [http://ganjoho.jp/data/reg\\_stat/statistics/dl/Pref\\_Smoking\\_Rate\(2001\\_2013\).xls](http://ganjoho.jp/data/reg_stat/statistics/dl/Pref_Smoking_Rate(2001_2013).xls).

12  
13  
14 (accessed 5 May 2017)

15  
16  
17 26. JAPAN TOBACCO INC(JTI),2011. Japanese Domestic Cigarette Sales Results for

18  
19 April 2011 (Preliminary Report) 2011 [cited 2015 June 11]. Available from:

20  
21  
22 [http://www.jt.com/investors/media/press\\_releases/2011/pdf/20110512\\_12.pdf](http://www.jt.com/investors/media/press_releases/2011/pdf/20110512_12.pdf). (accessed

23  
24  
25 5 Jun 2015)

26  
27  
28 27. Ministry of Health Labour and Welfare., 2012. Summarize the results of National

29  
30 Health Nutrition Survey. 2012. [cited 2015 December 1]. Available from:

31  
32  
33 <http://www.mhlw.go.jp/file/04-Houdouhappyou-10904750-Kenkoukyoku-Gantaisakuke>

34  
35  
36 [nkouzoushinka/0000099296.pdf](http://www.mhlw.go.jp/file/04-Houdouhappyou-10904750-Kenkoukyoku-Gantaisakuke). (accessed 5 Jun 2016)

1  
2  
3  
4  
5  
6  
7  
8  
9  
10  
11  
12  
13  
14  
15  
16  
17  
18  
19  
20  
21  
22  
23  
24  
25  
26  
27  
28  
29  
30  
31  
32  
33  
34  
35  
36  
37  
38  
39  
40  
41  
42  
43  
44  
45  
46  
47  
48  
49  
50  
51  
52  
53  
54  
55  
56  
57  
58  
59  
60

**List of Figures**

**Figure 1** Flow chart for the determination of smoking status

For peer review only

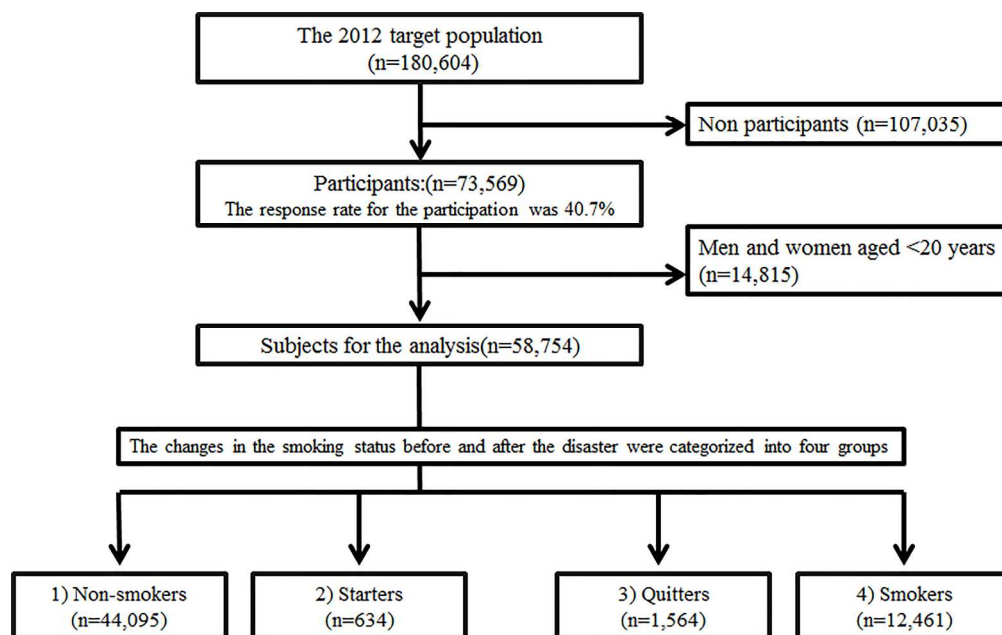

Figure 1. Flow chart for the determination of smoking status

289x182mm (300 x 300 DPI)

**Supplement Table 1.** Multivariable-adjusted prevalence ratios (PRs) and 95% confidence intervals of start smoking after the disaster according to geographical, disaster-related and psychosocial factors among 44,729 non-smokers before the disaster.

| Model                                                                      | Men     |             |          | Women   |             |          |
|----------------------------------------------------------------------------|---------|-------------|----------|---------|-------------|----------|
|                                                                            | PR      | (95%CI)     | P values | PR      | (95%CI)     | P values |
| n=44729                                                                    | n=16727 |             |          | n=28002 |             |          |
| <b>Demographic characteristics</b>                                         |         |             |          |         |             |          |
| Men(versus women) <sup>†</sup>                                             |         |             |          |         |             |          |
| <b>Age group**</b>                                                         |         |             |          |         |             |          |
| Ages 20-49 years                                                           | 5.73    | 4.26 - 7.70 | <.0001   | 4.81    | 3.29 - 7.01 | <.0001   |
| Ages 50-64 years                                                           | 2.02    | 1.47 - 2.77 | <.0001   | 1.39    | 0.90 - 2.13 | 0.135    |
| Ages ≥65 years (Ref.)                                                      | 1.00    |             |          | 1.00    |             |          |
| <b>Educational attainment</b>                                              |         |             |          |         |             |          |
| <b>Vocational college, junior college or more (versus lower education)</b> | 0.68    | 0.53 - 0.87 | 0.002    | 0.71    | 0.54 - 0.95 | 0.020    |
| <b>History of mental illness</b>                                           |         |             |          |         |             |          |
| Yes(versus No)                                                             | 1.24    | 0.82 - 1.86 | 0.304    | 1.79    | 1.20 - 2.66 | 0.005    |
| <b>Disaster-related factors</b>                                            |         |             |          |         |             |          |
| <b>Living arrangement</b>                                                  |         |             |          |         |             |          |
| Evacuation Shelter                                                         | 1.22    | 0.49 - 3.05 | 0.671    | 1.59    | 0.50 - 5.12 | 0.436    |
| Temporary housing                                                          | 0.96    | 0.65 - 1.43 | 0.840    | 1.57    | 1.03 - 1.03 | 0.034    |
| Rental housing or apartment                                                | 1.25    | 1.00 - 1.57 | 0.056    | 1.34    | 1.02 - 1.76 | 0.039    |
| Relative's home                                                            | 1.11    | 0.61 - 2.03 | 0.725    | 1.12    | 0.56 - 2.23 | 0.745    |
| Own home (Ref.)                                                            | 1.00    |             |          | 1.00    |             |          |
| <b>House damage</b>                                                        |         |             |          |         |             |          |
| Yes(versus No)                                                             | 1.44    | 1.11 - 1.86 | 0.006    | 0.99    | 0.70 - 1.39 | 0.953    |
| <b>Experience of disaster</b>                                              |         |             |          |         |             |          |
| Having experienced a tsunami                                               | 1.44    | 1.14 - 1.81 | 0.002    | 1.05    | 0.76 - 1.46 | 0.756    |
| Yes(versus No)                                                             |         |             |          |         |             |          |
| <b>Psychosocial factors</b>                                                |         |             |          |         |             |          |
| Changes in jobs                                                            | 1.70    | 1.19 - 2.44 | 0.004    | 1.02    | 0.60 - 1.74 | 0.936    |
| Yes(versus No)                                                             |         |             |          |         |             |          |
| Becoming unemployed                                                        | 0.99    | 0.76 - 1.29 | 0.922    | 1.47    | 1.13 - 1.92 | 0.004    |
| Yes(versus No)                                                             |         |             |          |         |             |          |
| Decreased Income                                                           | 1.05    | 0.83 - 1.34 | 0.694    | 0.93    | 0.67 - 1.31 | 0.692    |
| Yes(versus No)                                                             |         |             |          |         |             |          |
| Presence of traumatic symptoms(PCL-S)                                      | 1.30    | 0.96 - 1.75 | 0.090    | 2.31    | 1.68 - 3.18 | <.0001   |
| ≥44(versus ≤43)                                                            |         |             |          |         |             |          |
| Presence of non-specific mental illness(K6)                                | 1.75    | 1.28 - 2.39 | 0.001    | 1.00    | 0.70 - 1.42 | 0.995    |
| ≥13(versus ≤12)                                                            |         |             |          |         |             |          |

<sup>†</sup>Adjusted for age, and educational attainment, history of mental illness, living arrangement, house damage, having experienced a tsunami, changes in jobs, becoming unemployed, decreased Income, presence of traumatic symptoms and presence of non-specific mental illness except for the variable of interest.



**Supplemental Table 2.** Multivariable-adjusted prevalence ratios (PRs) and 95% confidence intervals of quit smoking after the disaster according to geographical, disaster-related and psychosocial factors among 14,025 smokers before the disaster.

| Model                                                               | Men     |             |          | Women  |             |          |
|---------------------------------------------------------------------|---------|-------------|----------|--------|-------------|----------|
|                                                                     | PR      | (95%CI)     | P values | PR     | (95%CI)     | P values |
| n=14025                                                             | n=10037 |             |          | n=3998 |             |          |
| <b>Demographic characteristics</b>                                  |         |             |          |        |             |          |
| Men(versus women)*                                                  |         |             |          |        |             |          |
| <b>Age group**</b>                                                  |         |             |          |        |             |          |
| Ages 20-49 years                                                    | 0.43    | 0.36 - 0.51 | <.0001   | 0.92   | 0.65 - 1.30 | 0.620    |
| Ages 50-64 years                                                    | 0.59    | 0.50 - 0.71 | <.0001   | 0.58   | 0.40 - 0.86 | 0.007    |
| Ages ≥65 years (Ref.)                                               | 1.00    |             |          | 1.00   |             |          |
| <b>Educational attainment</b>                                       |         |             |          |        |             |          |
| Vocational college, junior college or more (versus lower education) | 1.33    | 1.14 - 1.55 | <.001    | 1.34   | 1.10 - 1.63 | 0.003    |
| <b>History of mental illness</b>                                    |         |             |          |        |             |          |
| Yes(versus No)                                                      |         |             |          |        |             |          |
| <b>Disaster-related factors</b>                                     |         |             |          |        |             |          |
| <b>Living arrangement</b>                                           |         |             |          |        |             |          |
| Evacuation Shelter                                                  | 1.15    | 0.59 - 2.25 | 0.675    | 1.42   | 0.48 - 4.24 | 0.529    |
| Temporary housing                                                   | 1.05    | 0.83 - 1.33 | 0.684    | 0.73   | 0.50 - 1.07 | 0.111    |
| Rental housing or apartment                                         | 1.11    | 0.96 - 1.29 | 0.152    | 1.12   | 0.92 - 1.35 | 0.251    |
| Relative's home                                                     | 1.21    | 0.83 - 1.77 | 0.329    | 1.19   | 0.70 - 2.05 | 0.522    |
| Own home (Ref.)                                                     | 1.00    |             |          | 1.00   |             |          |
| <b>House damage</b>                                                 |         |             |          |        |             |          |
| Yes(versus No)                                                      |         |             |          |        |             |          |
| <b>Experience of disaster</b>                                       |         |             |          |        |             |          |
| Having experienced a tsunami                                        |         |             |          |        |             |          |
| Yes(versus No)                                                      |         |             |          |        |             |          |
| <b>Psychosocial factors</b>                                         |         |             |          |        |             |          |
| Changes in jobs                                                     |         |             |          |        |             |          |
| Yes(versus No)                                                      |         |             |          |        |             |          |
| Becoming unemployed                                                 |         |             |          |        |             |          |
| Yes(versus No)                                                      |         |             |          |        |             |          |
| Decreased Income                                                    |         |             |          |        |             |          |
| Yes(versus No)                                                      |         |             |          |        |             |          |
| Presence of traumatic symptoms(PCL-S)                               |         |             |          |        |             |          |
| ≥44(versus ≤43)                                                     |         |             |          |        |             |          |
| Presence of non-specific mental illness(K6)                         |         |             |          |        |             |          |
| ≥13(versus ≤12)                                                     |         |             |          |        |             |          |

\*Adjusted for age, and educational attainment, living arrangement, decreased Income, presence of traumatic symptoms and presence of non-specific mental illness except for the variable of interest.

## STROBE Statement—checklist of items that should be included in reports of observational studies

|                                    | Item No | Recommendation                                                                                                                                                                                                                                                                                                                                                                                                                                                                                                                                                                                                                                                                                   |
|------------------------------------|---------|--------------------------------------------------------------------------------------------------------------------------------------------------------------------------------------------------------------------------------------------------------------------------------------------------------------------------------------------------------------------------------------------------------------------------------------------------------------------------------------------------------------------------------------------------------------------------------------------------------------------------------------------------------------------------------------------------|
| <b>Title and abstract (P1-6)</b>   | 1       | (a) Indicate the study's design with a commonly used term in the title or the abstract<br>(b) Provide in the abstract an informative and balanced summary of what was done and what was found                                                                                                                                                                                                                                                                                                                                                                                                                                                                                                    |
| <b>Introduction (P7-8)</b>         |         |                                                                                                                                                                                                                                                                                                                                                                                                                                                                                                                                                                                                                                                                                                  |
| Background/rationale (P7)          | 2       | Explain the scientific background and rationale for the investigation being reported                                                                                                                                                                                                                                                                                                                                                                                                                                                                                                                                                                                                             |
| Objectives (P8)                    | 3       | State specific objectives, including any prespecified hypotheses                                                                                                                                                                                                                                                                                                                                                                                                                                                                                                                                                                                                                                 |
| <b>Methods (P8-13)</b>             |         |                                                                                                                                                                                                                                                                                                                                                                                                                                                                                                                                                                                                                                                                                                  |
| Study design (P8)                  | 4       | Present key elements of study design early in the paper                                                                                                                                                                                                                                                                                                                                                                                                                                                                                                                                                                                                                                          |
| Setting (P8)                       | 5       | Describe the setting, locations, and relevant dates, including periods of recruitment, exposure, follow-up, and data collection                                                                                                                                                                                                                                                                                                                                                                                                                                                                                                                                                                  |
| Participants (P8-9)                | 6       | (a) <i>Cohort study</i> —Give the eligibility criteria, and the sources and methods of selection of participants. Describe methods of follow-up<br><i>Case-control study</i> —Give the eligibility criteria, and the sources and methods of case ascertainment and control selection. Give the rationale for the choice of cases and controls<br><i>Cross-sectional study</i> —Give the eligibility criteria, and the sources and methods of selection of participants<br>(b) <i>Cohort study</i> —For matched studies, give matching criteria and number of exposed and unexposed<br><i>Case-control study</i> —For matched studies, give matching criteria and the number of controls per case |
| Variables (P10-P11)                | 7       | Clearly define all outcomes, exposures, predictors, potential confounders, and effect modifiers. Give diagnostic criteria, if applicable                                                                                                                                                                                                                                                                                                                                                                                                                                                                                                                                                         |
| Data sources/ measurement (P8-P11) | 8*      | For each variable of interest, give sources of data and details of methods of assessment (measurement). Describe comparability of assessment methods if there is more than one group                                                                                                                                                                                                                                                                                                                                                                                                                                                                                                             |
| Bias (P19)                         | 9       | Describe any efforts to address potential sources of bias                                                                                                                                                                                                                                                                                                                                                                                                                                                                                                                                                                                                                                        |
| Study size (P8-9)                  | 10      | Explain how the study size was arrived at                                                                                                                                                                                                                                                                                                                                                                                                                                                                                                                                                                                                                                                        |
| Quantitative variables (P10-11)    | 11      | Explain how quantitative variables were handled in the analyses. If applicable, describe which groupings were chosen and why                                                                                                                                                                                                                                                                                                                                                                                                                                                                                                                                                                     |
| Statistical methods (P12-13)       | 12      | (a) Describe all statistical methods, including those used to control for confounding<br>(b) Describe any methods used to examine subgroups and interactions<br>(c) Explain how missing data were addressed<br>(d) <i>Cohort study</i> —If applicable, explain how loss to follow-up was addressed<br><i>Case-control study</i> —If applicable, explain how matching of cases and controls was addressed<br><i>Cross-sectional study</i> —If applicable, describe analytical methods taking account of sampling strategy<br>(e) Describe any sensitivity analyses                                                                                                                                |

Continued on next page

| <b>Results (P13-25)</b>           |     |                                                                                                                                                                                                                                                                                                                                                                                                               |
|-----------------------------------|-----|---------------------------------------------------------------------------------------------------------------------------------------------------------------------------------------------------------------------------------------------------------------------------------------------------------------------------------------------------------------------------------------------------------------|
| Participants (P13)                | 13* | (a) Report numbers of individuals at each stage of study—eg numbers potentially eligible, examined for eligibility, confirmed eligible, included in the study, completing follow-up, and analysed<br>(b) Give reasons for non-participation at each stage<br>(c) Consider use of a flow diagram                                                                                                               |
| Descriptive data (P13-18)         | 14* | (a) Give characteristics of study participants (eg demographic, clinical, social) and information on exposures and potential confounders<br>(b) Indicate number of participants with missing data for each variable of interest<br>(c) <i>Cohort study</i> —Summarise follow-up time (eg, average and total amount)                                                                                           |
| Outcome data (P19-25)             | 15* | <i>Cohort study</i> —Report numbers of outcome events or summary measures over time<br><i>Case-control study</i> —Report numbers in each exposure category, or summary measures of exposure<br><i>Cross-sectional study</i> —Report numbers of outcome events or summary measures                                                                                                                             |
| Main results (P14-16)             | 16  | (a) Give unadjusted estimates and, if applicable, confounder-adjusted estimates and their precision (eg, 95% confidence interval). Make clear which confounders were adjusted for and why they were included<br>(b) Report category boundaries when continuous variables were categorized<br>(c) If relevant, consider translating estimates of relative risk into absolute risk for a meaningful time period |
| Other analyses<br>None            | 17  | Report other analyses done—eg analyses of subgroups and interactions, and sensitivity analyses                                                                                                                                                                                                                                                                                                                |
| <b>Discussion (P25-29)</b>        |     |                                                                                                                                                                                                                                                                                                                                                                                                               |
| Key results (P26-28)              | 18  | Summarise key results with reference to study objectives                                                                                                                                                                                                                                                                                                                                                      |
| Limitations (P28-29)              | 19  | Discuss limitations of the study, taking into account sources of potential bias or imprecision. Discuss both direction and magnitude of any potential bias                                                                                                                                                                                                                                                    |
| Interpretation (P29)              | 20  | Give a cautious overall interpretation of results considering objectives, limitations, multiplicity of analyses, results from similar studies, and other relevant evidence                                                                                                                                                                                                                                    |
| Generalisability<br>P29           | 21  | Discuss the generalisability (external validity) of the study results                                                                                                                                                                                                                                                                                                                                         |
| <b>Other information (P30-30)</b> |     |                                                                                                                                                                                                                                                                                                                                                                                                               |
| Funding (P30)                     | 22  | Give the source of funding and the role of the funders for the present study and, if applicable, for the original study on which the present article is based                                                                                                                                                                                                                                                 |

\*Give information separately for cases and controls in case-control studies and, if applicable, for exposed and unexposed groups in cohort and cross-sectional studies.

**Note:** An Explanation and Elaboration article discusses each checklist item and gives methodological background and published examples of transparent reporting. The STROBE checklist is best used in conjunction with this article (freely available on the Web sites of PLoS Medicine at <http://www.plosmedicine.org/>, Annals of Internal Medicine at <http://www.annals.org/>, and Epidemiology at <http://www.epidem.com/>). Information on the STROBE Initiative is available at [www.strobe-statement.org](http://www.strobe-statement.org).

# BMJ Open

## Associations of disaster-related and psychosocial factors with changes in smoking status after a disaster: A cross-sectional survey after the Great East Japan Earthquake

|                                 |                                                                                                                                                                                                                                                                                                                                                                                                                                                                                                                                                                                                                                                                                                                                                                                                                                                                                                                                                                                                                                                                                                                                                                                                                                                                                                                                                                                                                                                                                                                                                                                                                                                                                                                                                                                                                                                                                                                                                                                                                                                                          |
|---------------------------------|--------------------------------------------------------------------------------------------------------------------------------------------------------------------------------------------------------------------------------------------------------------------------------------------------------------------------------------------------------------------------------------------------------------------------------------------------------------------------------------------------------------------------------------------------------------------------------------------------------------------------------------------------------------------------------------------------------------------------------------------------------------------------------------------------------------------------------------------------------------------------------------------------------------------------------------------------------------------------------------------------------------------------------------------------------------------------------------------------------------------------------------------------------------------------------------------------------------------------------------------------------------------------------------------------------------------------------------------------------------------------------------------------------------------------------------------------------------------------------------------------------------------------------------------------------------------------------------------------------------------------------------------------------------------------------------------------------------------------------------------------------------------------------------------------------------------------------------------------------------------------------------------------------------------------------------------------------------------------------------------------------------------------------------------------------------------------|
| Journal:                        | <i>BMJ Open</i>                                                                                                                                                                                                                                                                                                                                                                                                                                                                                                                                                                                                                                                                                                                                                                                                                                                                                                                                                                                                                                                                                                                                                                                                                                                                                                                                                                                                                                                                                                                                                                                                                                                                                                                                                                                                                                                                                                                                                                                                                                                          |
| Manuscript ID                   | bmjopen-2017-018943.R2                                                                                                                                                                                                                                                                                                                                                                                                                                                                                                                                                                                                                                                                                                                                                                                                                                                                                                                                                                                                                                                                                                                                                                                                                                                                                                                                                                                                                                                                                                                                                                                                                                                                                                                                                                                                                                                                                                                                                                                                                                                   |
| Article Type:                   | Research                                                                                                                                                                                                                                                                                                                                                                                                                                                                                                                                                                                                                                                                                                                                                                                                                                                                                                                                                                                                                                                                                                                                                                                                                                                                                                                                                                                                                                                                                                                                                                                                                                                                                                                                                                                                                                                                                                                                                                                                                                                                 |
| Date Submitted by the Author:   | 10-Apr-2018                                                                                                                                                                                                                                                                                                                                                                                                                                                                                                                                                                                                                                                                                                                                                                                                                                                                                                                                                                                                                                                                                                                                                                                                                                                                                                                                                                                                                                                                                                                                                                                                                                                                                                                                                                                                                                                                                                                                                                                                                                                              |
| Complete List of Authors:       | <p>Nakano, Hironori ; Fukushima Medical University, Radiation Medical Science Center for the Fukushima Health Management Survey; Fukushima Medical University School of Medicine, Epidemiology</p> <p>Ohira, Tetsuya; Fukushima Medical University, Department of Epidemiology; Fukushima Medical University School of Medicine, Radiation Medical Center for Fukushima Health Management Survey</p> <p>Maeda, Masaharu ; Fukushima Medical University, Radiation Medical Science Center for the Fukushima Health Management Survey; Fukushima Medical University School of Medicine, Disaster Psychiatry</p> <p>Yabe, Hirooki; Fukushima Medical University School of Medicine, Neuropsychiatry; Radiation Medical Science Center for the Fukushima Health Management Survey</p> <p>Ohtsuru, Akira; Fukushima Medical University,</p> <p>Suzuki, Yuriko; National Institute of Mental Health, National Center of Neurology and Psychiatry,</p> <p>Harigane, Mayumi; Radiation Medical Science Center for the Fukushima Health Management Survey</p> <p>Horikoshi, Naoko; Radiation Medical Science Center for the Fukushima Health Management Survey,</p> <p>Nagai, Masato; Tohoku University Graduate School of Medicine, Division of Epidemiology, Department of Public Health and Forensic Medicine; Shiga University of Medical Science, Department of Health Science,</p> <p>Zhang, Wen; Fukushima Medical University School of Medicine, Epidemiology</p> <p>Takahashi, Hideto; Fukushima Medical University School of Medicine, Office of Information Management and Statistics, Radiation Medical Science Center for the Fukushima Health Management Survey, Faculty of Medicine, ; Fukushima Medical University School of Medicine, Radiation Medical Science Center for the Fukushima Health Management Survey</p> <p>Yasumura, Seiji; Fukushima Medical University</p> <p>Iso, Hiroyasu; Osaka University Graduate School of Medicine, Public Health, Department of Social and Environmental Medicine</p> <p>Kamiya, Kenji; Fukushima Medical University</p> |
| <b>Primary Subject Heading</b>: | Smoking and tobacco                                                                                                                                                                                                                                                                                                                                                                                                                                                                                                                                                                                                                                                                                                                                                                                                                                                                                                                                                                                                                                                                                                                                                                                                                                                                                                                                                                                                                                                                                                                                                                                                                                                                                                                                                                                                                                                                                                                                                                                                                                                      |
| Secondary Subject Heading:      | Epidemiology, Public health                                                                                                                                                                                                                                                                                                                                                                                                                                                                                                                                                                                                                                                                                                                                                                                                                                                                                                                                                                                                                                                                                                                                                                                                                                                                                                                                                                                                                                                                                                                                                                                                                                                                                                                                                                                                                                                                                                                                                                                                                                              |
| Keywords:                       | Disaster, Smoking cessation, Socioeconomic status, Population-based,                                                                                                                                                                                                                                                                                                                                                                                                                                                                                                                                                                                                                                                                                                                                                                                                                                                                                                                                                                                                                                                                                                                                                                                                                                                                                                                                                                                                                                                                                                                                                                                                                                                                                                                                                                                                                                                                                                                                                                                                     |

1  
2  
3  
4  
5  
6  
7  
8  
9  
10  
11  
12  
13  
14  
15  
16  
17  
18  
19  
20  
21  
22  
23  
24  
25  
26  
27  
28  
29  
30  
31  
32  
33  
34  
35  
36  
37  
38  
39  
40  
41  
42  
43  
44  
45  
46  
47  
48  
49  
50  
51  
52  
53  
54  
55  
56  
57  
58  
59  
60

|  |                      |
|--|----------------------|
|  | Psychological stress |
|  |                      |

SCHOLARONE™  
Manuscripts

For peer review only

1  
2  
3  
4  
5  
6 **Associations of disaster-related and psychosocial factors with changes in smoking**  
7  
8 **status after a disaster: A cross-sectional survey after the Great East Japan**  
9  
10  
11 **Earthquake**  
12

13  
14  
15  
16  
17 **Author names and affiliations.**

18 Hironori NAKANO <sup>1,2,\*</sup>, Tetsuya OHIRA <sup>1,2</sup>, Masaharu MAEDA <sup>2,3</sup>, Hirooki YABE <sup>4</sup>,  
19 Akira OHTSURU <sup>6</sup>, Yuriko SUZUKI <sup>5</sup>, Mayumi HARIGANE <sup>2</sup>, Naoko HORIKOSHI  
20 <sup>2</sup>, Masato NAGAI <sup>1,2, 9, 10</sup>, Wen ZHANG <sup>1</sup>, Hideto TAKAHASHI <sup>2</sup>, Seiji  
21 YASUMURA <sup>7</sup>, Hiroyasu ISO <sup>8</sup>, Kenji KAMIYA <sup>2</sup>  
22  
23  
24  
25  
26  
27

28 **Corresponding author.**

29 Hironori NAKANO

30 Radiation Medical Science Center for the Fukushima health management survey,  
31 Fukushima Medical University, 1 Hikariga-oka, Fukushima City 960-1295, JAPAN  
32  
33

34 Phone: +81-24-547-1343; Fax: +81-24-547-1336  
35

36 E-mail: h-nakano@fmu.ac.jp  
37  
38  
39  
40

41 Tetsuya OHIRA, e-mail: teohira@fmu.ac.jp

42 Masaharu MAEDA, e-mail: masagen@fmu.ac.jp

43 Hirooki YABE, e-mail: hyabe@fmu.ac.jp

44 Akira OHTSURU, e-mail: ohtsuru@fmu.ac.jp

45 Yuriko SUZUKI, e-mail: yrsuzuki@ncnp.go.jp

46 Mayumi HARIGANE, e-mail: harigane@fmu.ac.jp

47 Naoko HORIKOSHI, e-mail: copepe@fmu.ac.jp

48 Masato NAGAI, e-mail: m-nagai@med.tohoku.ac.jp  
49  
50  
51  
52  
53  
54  
55  
56  
57  
58  
59  
60

1  
2  
3  
4  
5 WEN Zhang, e-mail: zhangw09@fmu.ac.jp

6  
7 Hideto TAKAHASHI, e-mail: htaka@fmu.ac.jp

8  
9 Seiji YASUMURA, e-mail: yasumura@fmu.ac.jp

10  
11 Hiroyasu ISO, e-mail: iso@pbhel.med.osaka-u.ac.jp

12  
13 Kenji KAMIYA, e-mail: kkamiya@fmu.ac.jp

14  
15  
16  
17 **Author affiliations**

18 1 Department of Epidemiology, Fukushima Medical University, 1 Hikariga-oka,  
19 Fukushima City 960-1295, JAPAN

20 2 Radiation Medical Science Center for the Fukushima Health Management Survey,  
21 Fukushima Medical University, 1 Hikariga-oka, Fukushima City 960-1295, JAPAN

22 3 Department of Disaster Psychiatry, Fukushima Medical University, 1 Hikariga-oka,  
23 Fukushima City 960-1295, JAPAN

24 4 Department of Neuropsychiatry, Fukushima Medical University, 1 Hikariga-oka,  
25 Fukushima City 960-1295, JAPAN

26 5 National Institute of Mental Health: National Center of Neurology and Psychiatry, 4-  
27 1-1 Ogawa-Higashi, Kodaira, Tokyo 187-8551, JAPAN

28 6 Department of Radiation Health Management, Fukushima Medical University, 1  
29 Hikariga-oka, Fukushima City 960-1295, JAPAN

30 7 Department of Public Health, Fukushima Medical University, 1 Hikariga-oka,  
31 Fukushima City 960-1295, JAPAN

32 8 Public Health, Graduate School of Medicine Osaka University, 2-2 Yamadaoka, Suita,  
33 Osaka 565-0871, JAPAN

34 9 Tohoku Medical Megabank Organization, Tohoku University, 2-1 Seiryomachi,  
35 Aoba-ku, Sendai, 980-8573, JAPAN

36 10 Graduate School of Medicine, Tohoku University, Sendai, 2-1 Seiryomachi, Aoba-  
37 ku, Sendai, 980-8573, JAPAN

**Keywords**

Disaster, Smoking cessation, Socioeconomic status, Population-based, Psychological stress.

**Word count**

2,675 Words



## Abstract

**Objective:** Few studies have comprehensively examined changes in smoking status and related factors after a disaster. We examined these factors amongst residents of an evacuation area in Fukushima after the Great East Japan Earthquake.

**Methods:** The study participants included 58,755 men and women aged  $\geq 20$  years who participated in the Fukushima Health Management Survey in 2012 after the disaster. Smoking status was classified as either current smokers or current non-smokers before and after the disaster. The participants were divided into the following groups: 1) non-smokers both before and after the disaster, 2) non-smokers before and smokers after the disaster, 3) smokers before and non-smokers after the disaster and 4) smokers both before and after the disaster. The adjusted prevalence ratios and 95% confidence intervals of changes in smoking status for demographic, disaster-related and psychosocial factors were tested using logistic regression analysis that was stratified by smoking status before the disaster.

**Results:** Amongst the 44,729 participants who were non-smokers before the disaster, 634 (1.4%) began smoking after the disaster. Amongst the 14,025 smokers before the disaster, 1,564 (11.1%) quit smoking after the disaster, and the proportion of smokers in the evacuation area consequently decreased from 21.2% to 19.6%. In the multivariable

1  
2  
3  
4  
5  
6 model, factors significantly associated with beginning smoking included being a male,  
7  
8 being younger, having a lower education, staying in a rental house/apartment, house  
9  
10 being damaged, having experienced a tsunami, change jobs and the presence of  
11  
12 traumatic symptoms and non-specific psychological distress. On the contrary, factors  
13  
14 associated with quitting smoking included being a female, being older, having a higher  
15  
16 education and having a stable income.  
17  
18  
19  
20  
21

22 **Conclusion:** The proportion of smokers slightly decreased amongst residents in the  
23  
24 evacuation area. The changes in smoking statuses were associated with disaster-  
25  
26 associated psychosocial factors, particularly changes in living conditions, having  
27  
28 experienced a tsunami, change jobs and developing post-traumatic stress disorder.  
29  
30  
31  
32  
33  
34  
35  
36

### 37 **Strengths and limitations of this study**

- 38  
39 • The strengths of this study lie in the sample size and procedures: a large-scale  
40  
41 survey (n = 58,755) was used for completing an inventory-based analysis of evacuees  
42  
43 following the earthquake.  
44  
45  
46  
47  
48 • Smoking status before and after the earthquake was investigated using a self-  
49  
50 administered questionnaire, and the number of cigarettes used amongst current smokers  
51  
52 was not evaluated.  
53  
54  
55  
56  
57  
58  
59  
60

1  
2  
3  
4  
5  
6  
7  
8  
9  
10  
11  
12  
13  
14  
15  
16  
17  
18  
19  
20  
21  
22  
23  
24  
25  
26  
27  
28  
29  
30  
31  
32  
33  
34  
35  
36  
37  
38  
39  
40  
41  
42  
43  
44  
45  
46  
47  
48  
49  
50  
51  
52  
53  
54  
55  
56  
57  
58  
59  
60

- The present study had a low overall response rate (40.7%); therefore, the representativeness of the target population remains uncertain.

For peer review only

## Introduction

The Great East Japan Earthquake that occurred on 11 March 2011 was one of the most disastrous events in the history of Japan. More than 160,000 people in the Fukushima Prefecture were forced to evacuate because of the Fukushima Dai-ichi nuclear power plant accident following the earthquake and the subsequent tsunami that struck the plant. Six years after the disaster, 77,283 have been evacuated as of March 2017.

The accident resulted in the disruption of normal lives of the people of Fukushima, including loss of life, relocations, maladjustment to new circumstances and induced stressful situations for the evacuees.<sup>1-3</sup> A previous report stated that cumulative mental stress is partly associated with an increased risk of smoking because of increased impulsivity.<sup>4</sup> Furthermore, post-traumatic stress disorder (PTSD) may be associated with an increased risk of smoking.<sup>5</sup> Moreover, most studies reported the proportion of smokers to have increased subsequent to disasters such as Hurricane Katrina<sup>6-8</sup>, earthquakes<sup>9-10</sup> and the September 11 terrorist attacks in New York City.<sup>5,11</sup> However, all previous studies comprised a limited sample size that ranged between 209 and 988 individuals and did not examine the change in smoking status in individuals and the associated factors. This warranted a comprehensive examination with a large sample size for determining the effect of disasters on smoking status.

1  
2  
3  
4  
5  
6 Amongst the evacuees in Fukushima Prefecture, the prevalences of overweight,  
7  
8 hypertension, diabetes mellitus, dyslipidaemia, polycythaemia and atrial fibrillation  
9  
10 increased one year after the nuclear power plant accident.<sup>12-15</sup> Therefore, the evacuees  
11  
12 are potentially at a greater risk of cardiovascular diseases if the proportion of current  
13  
14 smoking increases because smoking is a major risk factor associated with  
15  
16 cardiovascular diseases.  
17  
18  
19  
20  
21

22  
23 Therefore, we aimed to examine the smoking status after the Fukushima Dai-ichi  
24  
25 nuclear power plant accident amongst more than 100,000 people in the evacuation area  
26  
27 of the Fukushima Prefecture. The prevalences of a severe degree of traumatic  
28  
29 symptoms, psychological distress and anxiety after the nuclear accident are high  
30  
31 amongst the residents of the evacuation area<sup>3</sup>. Hence, we also aimed to examine the  
32  
33 associations of disaster-related and psychosocial factors with changes in smoking status.  
34  
35  
36  
37  
38  
39  
40  
41

## 42 **Methods**

### 43 **Participants**

44  
45 The government designated evacuation instruction zones following the Great East Japan  
46  
47 Earthquake that occurred on 11 March 2011. Between January and October 2012, the  
48  
49 evacuees participated in the Fukushima Health Management Survey of the Fukushima  
50  
51  
52  
53  
54  
55  
56  
57  
58  
59  
60

1  
2  
3  
4  
5  
6 Dai-ichi Nuclear Power Plant Accident that commenced in 2011. The ‘Mental Health  
7  
8 and Lifestyle Survey’, which is part of the mentioned longitudinal study, assesses how  
9  
10 the disaster and subsequent lifestyle of people affect the mental status of the evacuees  
11  
12 over a long period of time<sup>1,3</sup>.  
13  
14  
15

16  
17 The target population of the survey included men and women at least 15 years of age  
18  
19 who lived in the following evacuation zones specified by the government: Hirono Town,  
20  
21 Naraha Town, Tomioka Town, Kawauchi Village, Okuma Town, Futaba Town, Namie  
22  
23 Town, Katsurao Village, Minamisoma City, Tamura City, Kawamata Town, Iitate  
24  
25 Village and a part of Date City. The questionnaire was mailed on 18 January 2012 to  
26  
27 persons who had a certificate of residence in the evacuation area as of 11 March 2011.  
28  
29  
30  
31 Of all the residents in the area during the disaster, 180,605 had been born prior to 1  
32  
33 April 1995 (i.e., high school students or older). The participant response rate was 40.7%  
34  
35  
36  
37  
38  
39  
40  
41  
42  
43  
44  
45  
46  
47  
48  
49  
50  
51  
52  
53  
54  
55  
56  
57  
58  
59  
60

54 Since we sought to examine changes in smoking behaviour amongst the evacuees,  
55  
56 we limited our data to men and women who were least 20 years old, which is the legal  
57  
58 smoking age in Japan. Consequently, we used 58,754 participants for the analysis.

59 The purpose of this study was explained to all the respondents in a cover letter

1  
2  
3  
4  
5  
6 distributed with the questionnaire. The cover letter clearly indicated that the return of  
7  
8 the questionnaires would be regarded as consent for study participation. The survey data  
9  
10 collection was completed in 10 months (from January to October 2012). This survey  
11  
12 was approved by the ethics review committee of Fukushima Medical University (No.  
13  
14 1316).  
15  
16  
17  
18

19  
20 The questionnaire was used for determining smoking status, which was  
21  
22 classified as current smokers or current non-smokers just before the disaster; however,  
23  
24 we did not distinguish participants who had never smoked or ex-smokers from current  
25  
26 non-smokers. Smoking status one year after the disaster was classified as never smoked,  
27  
28 ex-smokers and current smokers. Next, the changes in the smoking status before and  
29  
30 after the disaster were categorized into four groups as shown in Figure 1: 1) non-  
31  
32 smokers both before and after the disaster (non-smokers), 2) non-smokers before and  
33  
34 smokers after the disaster (starters), 3) smokers before and non-smokers after the  
35  
36 disaster (quitters) and 4) smokers both before and after the disaster (smokers).  
37  
38  
39  
40  
41  
42  
43  
44  
45  
46  
47

#### 48 **Socioeconomic and disaster-related and psychosocial variables**

49

50  
51 Socioeconomic and disaster-related variables were assessed using the questionnaire  
52  
53 responses. The assessed variables included living arrangements (own home, evacuation  
54  
55  
56  
57  
58  
59

1  
2  
3  
4  
5  
6 shelter, temporary housing, rental housing or apartment and relative's home); whether  
7  
8 they had ever lived in evacuation shelters (yes or no); education level (elementary  
9  
10 school, junior high school and high school, vocational college, junior college, university  
11  
12 [four years] and graduate school); history of mental illness (yes or no); whether they  
13  
14 became unemployed (yes or no); whether their income decreased (yes or no); whether  
15  
16 their house was damaged (yes or no); whether they had experienced a tsunami before  
17  
18 (yes or no); the presence of traumatic symptoms assessed by the Japanese version of  
19  
20 PTSD Checklist-Stressor Specific Version [PCL-S] and the presence of non-specific  
21  
22 psychological distress measured using the Japanese version of the Kessler  
23  
24 Psychological Distress Scale [K6]. These Japanese versions were reported to be  
25  
26 validated.<sup>16–20</sup>

27  
28  
29  
30  
31  
32  
33  
34  
35  
36  
37 We considered a PCL-S score >44 as indicative of the presence of traumatic  
38  
39 symptoms.<sup>16,17,21</sup> We regarded a Kessler's K6 score  $\geq 13$  as indicative of the presence of  
40  
41 non-specific psychological distress.<sup>22–24</sup> Age was used as a categorical variable and  
42  
43 participants were classified into three age groups (20–49, 50–64 and  $\geq 65$  years).  
44  
45  
46  
47  
48 Education level was categorized as lower (high school or less) or higher (additional  
49  
50 vocational college or junior college experience or higher).  
51  
52  
53  
54  
55  
56  
57  
58  
59  
60



## Statistical analysis

The chi-square test was used for comparing the smoking status before and after the disaster. Disaster-related and socioeconomic variables were also compared amongst the categories of changes in smoking status before and after the disaster using the chi-square test.

We examined the association of demographic, disaster-related and psychosocial variables between those who began smoking compared with those who remained non-smokers after the disaster amongst all non-smokers before the disaster. We also examined the association of these variables between those who quit smoking compared with those who continued smoking amongst all smokers before the disaster.

Age- and sex-adjusted prevalence ratios (PRs) and 95% confidence intervals (CIs) of the changes in smoking status for demographic, disaster-related and psychosocial variables were calculated using logistic regression analysis. In the multivariable-adjusted model, adjustments were made for age (years), sex and other associated factors estimated as statistically significant by the age- and sex-adjusted model. The potential associated factors were educational attainment, history of mental illness, living arrangement, house damage, having experienced a tsunami, change jobs, becoming unemployed, decreased income, the presence of traumatic symptoms and the presence

1  
2  
3  
4  
5  
6 of non-specific psychological distress. Because the proportion of smokers largely  
7  
8 differed between men and women, we also conducted the multivariable analyses  
9  
10 stratified by sex. P values were obtained using a two-tailed test, and  $P < 0.05$  was  
11  
12 regarded as statistically significant. All statistical analyses were performed using the  
13  
14 software package SAS version 9.4 (SAS Institute Inc., Cary, NC, USA).  
15  
16  
17  
18

### 19 20 **Patient and Public Involvement**

21  
22 Patients and public were not involved in the present study. Patient consent is not  
23  
24 required.  
25  
26

### 27 28 **Results**

29  
30 The proportion of current smokers amongst the total of 58,754 men and women  
31  
32 significantly decreased from 23.9% to 22.3% after the disaster ( $P < 0.001$ ). The  
33  
34 corresponding proportion amongst men decreased from 37.5% to 35.2% ( $P < 0.001$ ),  
35  
36 whereas that amongst women decreased from 12.5% to 11.5% ( $P < 0.001$ ). Amongst the  
37  
38 participants, 634 (1.1%) men and women began smoking after the disaster and 1,564  
39  
40 (2.7%) men and women quit smoking after the disaster. The corresponding proportions  
41  
42 of initiating and quitting smoking were 1.4% and 3.7% for men and 0.8% and 1.8% for  
43  
44 women, respectively.  
45  
46  
47  
48  
49  
50  
51  
52

53 Table 1 shows the participants' demographic, disaster-related and psychosocial  
54  
55  
56  
57  
58  
59  
60

1  
2  
3  
4  
5  
6 variables in accordance with the categories of changes in smoking status, i.e., non-  
7  
8 smokers, starters, quitters and smokers. Compared with non-smokers, the beginner  
9  
10 smokers displayed higher proportions of men, younger ages, rental house/apartment,  
11  
12 shelter living, house damage, history of mental illness, having experienced a tsunami,  
13  
14 becoming unemployed, decreased income, traumatic symptoms and non-specific  
15  
16 psychological distress.  
17  
18  
19  
20  
21

22  
23 Compared with smokers, the quitters displayed higher proportions of women, older  
24  
25 age, higher education, history of mental illness, having experienced a tsunami and  
26  
27 becoming unemployed and lower proportions of shelter living, decreased income,  
28  
29 traumatic symptoms and non-specific psychological distress.  
30  
31  
32  
33  
34  
35  
36  
37  
38  
39  
40  
41  
42  
43  
44  
45  
46  
47  
48  
49  
50  
51  
52  
53  
54  
55  
56  
57  
58  
59  
60

**Table 1.** Demographic, disaster-related and psychosocial factors according to the categories of changes in smoking status amongst 58,754 men and women in the evacuation area.

|                                      | Total     |      | Non-smokers |      | Starters |      | P values | Smokers   |      | Quitters |      | P values |
|--------------------------------------|-----------|------|-------------|------|----------|------|----------|-----------|------|----------|------|----------|
|                                      | n         | %    | n           | %    | n        | %    |          | n         | %    | n        | %    |          |
| <b>Demographic characteristics</b>   |           |      |             |      |          |      |          |           |      |          |      |          |
| <b>Sex</b>                           | n = 58754 |      | n = 44095   |      | n = 634  |      |          | n = 12461 |      | n = 1564 |      |          |
| Men                                  | 26764     | 45.6 | 16351       | 37.1 | 376      | 59.3 | <.0001   | 9040      | 72.5 | 997      | 63.7 | <.0001   |
| Women                                | 31990     | 54.4 | 27744       | 62.9 | 258      | 40.7 |          | 3421      | 27.5 | 567      | 36.3 |          |
| <b>Age group</b>                     | n = 58754 |      |             |      |          |      |          |           |      |          |      |          |
| 20–49 years                          | 21479     | 36.6 | 13571       | 30.8 | 382      | 60.3 | <.0001   | 6727      | 54.0 | 799      | 51.1 | <.0001   |
| 50–64 years                          | 18744     | 31.9 | 14136       | 32.1 | 147      | 23.2 |          | 4012      | 32.2 | 449      | 28.7 |          |
| ≥65 years                            | 18531     | 31.5 | 16388       | 37.2 | 105      | 16.6 |          | 1722      | 13.8 | 316      | 20.2 |          |
| <b>Educational attainment</b>        | n = 57076 |      |             |      |          |      |          |           |      |          |      |          |
| Primary or middle school             | 13383     | 23.4 | 10680       | 25.0 | 102      | 16.8 | <.0001   | 2329      | 19.1 | 272      | 17.7 | <.0001   |
| High school                          | 28331     | 49.6 | 20190       | 47.2 | 331      | 54.5 |          | 6986      | 57.2 | 824      | 53.8 |          |
| Vocational college or Junior college | 10127     | 17.7 | 7849        | 18.4 | 116      | 19.1 |          | 1883      | 15.4 | 279      | 18.2 |          |
| University or graduate school        | 5235      | 9.2  | 4014        | 9.4  | 58       | 9.6  |          | 1005      | 8.2  | 158      | 10.3 |          |
| <b>History of mental illness</b>     | n = 57137 |      |             |      |          |      |          |           |      |          |      |          |
| Yes                                  | 3149      | 5.5  | 2332        | 5.4  | 60       | 9.9  | <.0001   | 662       | 5.5  | 95       | 6.2  | <.0001   |
| <b>Disaster-related factors</b>      |           |      |             |      |          |      |          |           |      |          |      |          |
| <b>Living arrangement</b>            | n = 47099 |      |             |      |          |      |          |           |      |          |      |          |
| Evacuation shelter                   | 522       | 1.1  | 401         | 1.1  | 8        | 1.6  | <.0001   | 99        | 1.0  | 14       | 1.1  | <.0001   |

|    |                                                         |           |      |       |      |     |      |        |      |      |     |      |        |
|----|---------------------------------------------------------|-----------|------|-------|------|-----|------|--------|------|------|-----|------|--------|
| 1  |                                                         |           |      |       |      |     |      |        |      |      |     |      |        |
| 2  |                                                         |           |      |       |      |     |      |        |      |      |     |      |        |
| 3  |                                                         |           |      |       |      |     |      |        |      |      |     |      |        |
| 4  |                                                         |           |      |       |      |     |      |        |      |      |     |      |        |
| 5  | Temporary housing                                       | 5343      | 11.3 | 3989  | 11.3 | 61  | 12.6 |        | 1164 | 11.6 | 129 | 10.3 |        |
| 6  | Rental house or apartment                               | 19330     | 41.0 | 13654 | 38.7 | 270 | 55.7 |        | 4780 | 47.4 | 626 | 49.8 |        |
| 7  | Relative's home                                         | 2127      | 4.5  | 1731  | 4.9  | 21  | 4.3  |        | 325  | 3.2  | 50  | 4.0  |        |
| 8  | Own home                                                | 17576     | 37.3 | 13862 | 39.3 | 101 | 20.8 |        | 3252 | 32.3 | 361 | 28.7 |        |
| 9  | Others                                                  | 2201      | 4.7  | 1644  | 4.7  | 24  | 4.9  |        | 457  | 4.5  | 76  | 6.1  |        |
| 10 |                                                         |           |      |       |      |     |      |        |      |      |     |      |        |
| 11 |                                                         |           |      |       |      |     |      |        |      |      |     |      |        |
| 12 |                                                         |           |      |       |      |     |      |        |      |      |     |      |        |
| 13 |                                                         |           |      |       |      |     |      |        |      |      |     |      |        |
| 14 | <b>Experienced living in evacuation shelters</b>        | n = 58754 |      |       |      |     |      |        |      |      |     |      |        |
| 15 |                                                         |           |      |       |      |     |      |        |      |      |     |      |        |
| 16 |                                                         |           |      |       |      |     |      |        |      |      |     |      |        |
| 17 | Yes                                                     | 15865     | 27.0 | 11887 | 27.0 | 198 | 31.2 | <.0001 | 3365 | 27.0 | 415 | 26.5 | <.0001 |
| 18 |                                                         |           |      |       |      |     |      |        |      |      |     |      |        |
| 19 |                                                         |           |      |       |      |     |      |        |      |      |     |      |        |
| 20 | <b>House damage</b>                                     | n = 58754 |      |       |      |     |      |        |      |      |     |      |        |
| 21 |                                                         |           |      |       |      |     |      |        |      |      |     |      |        |
| 22 | Yes                                                     | 8706      | 14.8 | 6528  | 14.8 | 134 | 21.1 | <.0001 | 1812 | 14.5 | 232 | 14.8 | <.0001 |
| 23 |                                                         |           |      |       |      |     |      |        |      |      |     |      |        |
| 24 |                                                         |           |      |       |      |     |      |        |      |      |     |      |        |
| 25 | <b>Experience of disaster</b>                           |           |      |       |      |     |      |        |      |      |     |      |        |
| 26 | Having experienced a tsunami                            | n = 58754 |      |       |      |     |      |        |      |      |     |      |        |
| 27 |                                                         |           |      |       |      |     |      |        |      |      |     |      |        |
| 28 | Yes                                                     | 11807     | 20.1 | 8559  | 19.4 | 176 | 27.8 | <.0001 | 2747 | 22.0 | 325 | 20.8 | <.0001 |
| 29 |                                                         |           |      |       |      |     |      |        |      |      |     |      |        |
| 30 |                                                         |           |      |       |      |     |      |        |      |      |     |      |        |
| 31 | <b>Psychosocial factors</b>                             |           |      |       |      |     |      |        |      |      |     |      |        |
| 32 |                                                         |           |      |       |      |     |      |        |      |      |     |      |        |
| 33 | Change jobs                                             | n = 58754 |      |       |      |     |      |        |      |      |     |      |        |
| 34 |                                                         |           |      |       |      |     |      |        |      |      |     |      |        |
| 35 | Yes                                                     | 2542      | 4.3  | 1599  | 3.6  | 56  | 8.8  | <.0001 | 798  | 6.4  | 89  | 5.7  | <.0001 |
| 36 |                                                         |           |      |       |      |     |      |        |      |      |     |      |        |
| 37 | Becoming unemployed                                     | n = 58754 |      |       |      |     |      |        |      |      |     |      |        |
| 38 |                                                         |           |      |       |      |     |      |        |      |      |     |      |        |
| 39 | Yes                                                     | 12255     | 20.9 | 8643  | 19.6 | 172 | 27.1 | <.0001 | 3016 | 24.2 | 424 | 27.1 | <.0001 |
| 40 |                                                         |           |      |       |      |     |      |        |      |      |     |      |        |
| 41 |                                                         |           |      |       |      |     |      |        |      |      |     |      |        |
| 42 | Decreased income                                        | n = 58754 |      |       |      |     |      |        |      |      |     |      |        |
| 43 |                                                         |           |      |       |      |     |      |        |      |      |     |      |        |
| 44 | Yes                                                     | 11141     | 19.0 | 7548  | 17.1 | 145 | 22.9 | <.0001 | 3117 | 25.0 | 331 | 21.2 | <.0001 |
| 45 |                                                         |           |      |       |      |     |      |        |      |      |     |      |        |
| 46 |                                                         |           |      |       |      |     |      |        |      |      |     |      |        |
| 47 | <b>Presence of traumatic symptoms (PCL-S) ≥44</b>       | n = 58754 |      |       |      |     |      |        |      |      |     |      |        |
| 48 |                                                         |           |      |       |      |     |      |        |      |      |     |      |        |
| 49 | Yes                                                     | 12266     | 20.9 | 9247  | 21.0 | 210 | 33.1 | <.0001 | 2515 | 20.2 | 294 | 18.8 | <.0001 |
| 50 |                                                         |           |      |       |      |     |      |        |      |      |     |      |        |
| 51 |                                                         |           |      |       |      |     |      |        |      |      |     |      |        |
| 52 |                                                         |           |      |       |      |     |      |        |      |      |     |      |        |
| 53 | <b>Presence of non-specific mental illness (K6) ≥13</b> | n = 58754 |      |       |      |     |      |        |      |      |     |      |        |
| 54 |                                                         |           |      |       |      |     |      |        |      |      |     |      |        |
| 55 |                                                         |           |      |       |      |     |      |        |      |      |     |      |        |
| 56 |                                                         |           |      |       |      |     |      |        |      |      |     |      |        |
| 57 |                                                         |           |      |       |      |     |      |        |      |      |     |      |        |
| 58 |                                                         |           |      |       |      |     |      |        |      |      |     |      |        |
| 59 |                                                         |           |      |       |      |     |      |        |      |      |     |      |        |
| 60 |                                                         |           |      |       |      |     |      |        |      |      |     |      |        |

1  
2  
3  
4  
5 Yes 8556 14.0 6337 14.4 157 24.8 <.0001 1853 14.9 209 13.4 <.0001  
6  
7  
8  
9  
10  
11  
12  
13  
14  
15  
16  
17  
18  
19  
20  
21  
22  
23  
24  
25  
26  
27  
28  
29  
30  
31  
32  
33  
34  
35  
36  
37  
38  
39  
40  
41  
42  
43  
44  
45  
46  
47  
48  
49  
50  
51  
52  
53  
54  
55  
56  
57  
58  
59  
60

---

For peer review only

For peer review only - <http://bmjopen.bmj.com/site/about/guidelines.xhtml>

1  
2  
3  
4  
5  
6 Table 2 indicates age- and sex-adjusted PRs and 95% CIs for the group that started  
7  
8 smoking after the disaster according to demographic, disaster-related and psychosocial  
9  
10 factors amongst the 44,729 smokers before the disaster. The corresponding age- and  
11  
12 sex-adjusted PRs (95% CIs) were as follows: 2.91 (2.48–3.42) for men, 5.17 (4.15–  
13  
14 6.43) for ages 20–49 years, 1.74 (1.35–2.23) for ages 50–64 years, 0.68 (0.57–0.82) for  
15  
16 higher education (junior college and higher), 2.03 (1.54–2.67) for a history of mental  
17  
18 illness, 1.46 (1.10–1.93) for living in temporary housing, 1.38 (1.16–1.64) for living in a  
19  
20 rental house/apartment, 1.64 (1.35–1.99) for house damage, 1.57 (1.32–1.88) for having  
21  
22 experienced a tsunami, 1.57 (1.18–2.08) for change jobs, 1.53 (1.28–1.83) for becoming  
23  
24 unemployed, 1.18 (0.97–1.42) for decreased income, 2.38 (2.01–2.83) for the presence  
25  
26 of traumatic symptoms and 2.26 (1.88–2.72) for the presence of non-specific mental  
27  
28 illness.  
29  
30  
31  
32  
33  
34  
35  
36  
37  
38

39 The age- and sex-adjusted and multivariable-adjusted PRs and 95% CIs of  
40  
41 participants who started smoking after the disaster according to demographic, disaster-  
42  
43 related and psychosocial factors were calculated amongst the 44,729 non-smokers  
44  
45 before the disaster. The corresponding multivariable-adjusted PRs (95% CIs) were as  
46  
47 follows: 3.01 (2.55–3.55) for men, 5.55 (4.40–7.00) for ages 20–49 years, 1.81 (1.40–  
48  
49 2.33) for ages 50–64 years, 0.69 (0.57–0.83) for higher education (junior college and  
50  
51  
52  
53  
54  
55  
56  
57  
58  
59  
60

1  
2  
3  
4  
5  
6 higher), 1.45 (1.09–1.93) for a history of mental illness, 1.33 (1.12–1.58) for living in a  
7  
8 rental house/apartment, 1.24 (1.01–1.50) for house damage, 1.29 (1.07–1.55) for having  
9  
10 experienced a tsunami, 1.41 (1.05–1.89) for change jobs, 1.19 (0.99–1.43) for becoming  
11  
12 unemployed, 1.70 (1.37–2.11) for the presence of traumatic symptoms and 1.38 (1.09–  
13  
14 1.75) for the presence of non-specific mental illness. These associations did not  
15  
16  
17  
18  
19  
20 substantially differ between men and women (Supplemental Table 1).  
21  
22  
23  
24  
25  
26  
27  
28  
29  
30  
31  
32  
33  
34  
35  
36  
37  
38  
39  
40  
41  
42  
43  
44  
45  
46  
47  
48  
49  
50  
51  
52  
53  
54  
55  
56  
57  
58  
59  
60



**TABLE 2.** Age- and sex-adjusted prevalence ratios (PRs) and 95% confidence intervals (CIs) of starting smoking after the disaster according to demographic, disaster-related and psychosocial factors amongst 44,729 non-smokers before the disaster.

| Model                                                               | Age- and sex-adjusted model |             |          | Multivariable-adjusted model <sup>#</sup> |             |          |
|---------------------------------------------------------------------|-----------------------------|-------------|----------|-------------------------------------------|-------------|----------|
|                                                                     | PR                          | (95% CI)    | P values | PR                                        | (95% CI)    | P values |
| n = 44729                                                           |                             |             |          |                                           |             |          |
| <b>Demographic characteristics</b>                                  |                             |             |          |                                           |             |          |
| Men (versus women)*                                                 | 2.91                        | 2.48 - 3.42 | <.0001   | 3.01                                      | 2.55 - 3.55 | <.0001   |
| <b>Age group**</b>                                                  |                             |             |          |                                           |             |          |
| Ages 20–49 years                                                    | 5.17                        | 4.15 - 6.43 | <.0001   | 5.55                                      | 4.40 - 7.00 | <.0001   |
| Ages 50–64 years                                                    | 1.74                        | 1.35 - 2.23 | <.0001   | 1.81                                      | 1.40 - 2.33 | <.0001   |
| Ages ≥65 years (Ref.)                                               | 1.00                        |             |          | 1.00                                      |             |          |
| <b>Educational attainment</b>                                       |                             |             |          |                                           |             |          |
| Vocational college, junior college or more (versus lower education) | 0.68                        | 0.57 - 0.82 | <.0001   | 0.69                                      | 0.57 - 0.83 | <.0001   |
| <b>History of mental illness</b>                                    |                             |             |          |                                           |             |          |
| Yes (versus No)                                                     | 2.03                        | 1.54 - 2.67 | <.0001   | 1.45                                      | 1.09 - 1.93 | 0.010    |
| <b>Disaster-related factors</b>                                     |                             |             |          |                                           |             |          |
| <b>Living arrangement</b>                                           |                             |             |          |                                           |             |          |
| Evacuation shelter                                                  | 1.53                        | 0.75 - 3.13 | 0.246    | 1.36                                      | 0.66 - 2.78 | 0.409    |
| Temporary housing                                                   | 1.46                        | 1.10 - 1.93 | 0.009    | 1.25                                      | 0.94 - 1.66 | 0.127    |
| Rental house or apartment                                           | 1.38                        | 1.16 - 1.64 | <.001    | 1.33                                      | 1.12 - 1.58 | 0.001    |
| Relative's home                                                     | 1.18                        | 0.75 - 1.85 | 0.467    | 1.14                                      | 0.72 - 1.78 | 0.580    |
| Own home (Ref.)                                                     | 1.00                        |             |          | 1.00                                      |             |          |
| <b>House damage</b>                                                 |                             |             |          |                                           |             |          |
| Yes (versus No)                                                     | 1.64                        | 1.35 - 1.99 | <.0001   | 1.24                                      | 1.01 - 1.50 | 0.038    |
| <b>Experience of disaster</b>                                       |                             |             |          |                                           |             |          |
| Having experienced a tsunami                                        |                             |             |          |                                           |             |          |
| Yes (versus No)                                                     | 1.57                        | 1.32 - 1.88 | <.0001   | 1.29                                      | 1.07 - 1.55 | 0.008    |
| <b>Psychosocial factors</b>                                         |                             |             |          |                                           |             |          |
| Change jobs                                                         |                             |             |          |                                           |             |          |
| Yes (versus No)                                                     | 1.57                        | 1.18 - 2.08 | 0.002    | 1.41                                      | 1.05 - 1.89 | 0.023    |
| Becoming unemployed                                                 |                             |             |          |                                           |             |          |
| Yes (versus No)                                                     | 1.53                        | 1.28 - 1.83 | <.0001   | 1.19                                      | 0.99 - 1.43 | 0.064    |
| Decreased income                                                    |                             |             |          |                                           |             |          |
| Yes (versus No)                                                     | 1.18                        | 0.97 - 1.42 | 0.092    |                                           |             |          |
| Presence of traumatic symptoms (PCL-S) ≥44(versus ≤43)              | 2.38                        | 2.01 - 2.83 | <.0001   | 1.70                                      | 1.37 - 2.11 | <.0001   |

1  
2  
3  
4  
5  
6  
7  
8

|                                                                            |      |      |   |      |        |      |      |   |      |       |
|----------------------------------------------------------------------------|------|------|---|------|--------|------|------|---|------|-------|
| Presence of non-specific mental illness (K6) $\geq 13$ (versus $\leq 12$ ) | 2.26 | 1.88 | - | 2.72 | <.0001 | 1.38 | 1.09 | - | 1.75 | 0.007 |
|----------------------------------------------------------------------------|------|------|---|------|--------|------|------|---|------|-------|

---

9  
10 \*Age-adjusted

11 \*\*Sex-adjusted

12 #Adjusted for age and sex, educational attainment, history of mental illness, living arrangement, house damage, having experienced a tsunami, change jobs, becoming unemployed, decreased income, the presence of traumatic symptoms and the presence of non-specific mental illness except for the variable of interest.  
13  
14  
15  
16  
17  
18  
19  
20  
21  
22  
23  
24  
25  
26  
27  
28  
29  
30  
31  
32  
33  
34  
35  
36  
37  
38  
39  
40  
41  
42  
43  
44  
45  
46  
47  
48  
49  
50  
51  
52  
53  
54  
55  
56  
57  
58  
59  
60

1  
2  
3  
4  
5  
6 Table 3 indicates the age- and sex-adjusted PRs and 95% CIs of quitting smoking  
7  
8 after the disaster according to demographic, disaster-related and psychosocial factors  
9  
10 amongst the 14,025 smokers before the disaster. The age- and sex-adjusted PRs (95%  
11  
12 CIs) were 0.63 (0.56–0.71) for men, 0.58 (0.50–0.66) for 20–49 years, 0.59 (0.50–0.68)  
13  
14 for 50–64 years, 1.32 (1.17–1.49) for higher education, 0.85 (0.75–0.97) for decreased  
15  
16 income, 0.85 (0.74–0.97) for the presence of traumatic symptoms and 0.83 (0.71–0.97)  
17  
18 for the presence of non-specific mental illness.  
19  
20  
21  
22  
23  
24

25 The corresponding multivariable-adjusted PRs (95% CIs) were 0.63 (0.56–0.71)  
26  
27 for men, 0.53 (0.46–0.62) for 20–49 years, 0.57 (0.48–0.66) for 50–64 years, 1.31  
28  
29 (1.16–1.47) for higher education, 0.89 (0.76–0.98) for decreased income, 0.89 (0.76–  
30  
31 1.05) for the presence of traumatic symptoms and 0.89 (0.74–1.07) for the presence of  
32  
33 non-specific mental illness. These associations did not substantially differ between men  
34  
35 and women (Supplemental Table 2).  
36  
37  
38  
39  
40  
41  
42  
43  
44  
45  
46  
47  
48  
49  
50  
51  
52  
53  
54  
55  
56  
57  
58  
59  
60

**TABLE 3.** Age- and sex-adjusted prevalence ratios (PRs) and 95% confidence intervals (CIs) of quitting smoking after the disaster according to demographic, disaster-related and psychosocial factors amongst the 14,025 smokers before the disaster.

| Model                                                               | Age- and sex-adjusted model |             |          | Multivariable-adjusted model <sup>#</sup> |             |          |
|---------------------------------------------------------------------|-----------------------------|-------------|----------|-------------------------------------------|-------------|----------|
|                                                                     | PR                          | (95% CI)    | P values | PR                                        | (95% CI)    | P values |
| n = 14025                                                           |                             |             |          |                                           |             |          |
| <b>Demographic characteristics</b>                                  |                             |             |          |                                           |             |          |
| Men (versus women)*                                                 | 0.63                        | 0.56 - 0.71 | <.0001   | 0.63                                      | 0.56 - 0.71 | <.0001   |
| <b>Age group**</b>                                                  |                             |             |          |                                           |             |          |
| Ages 20–49 years                                                    | 0.58                        | 0.50 - 0.66 | <.0001   | 0.53                                      | 0.46 - 0.62 | <.0001   |
| Ages 50–64 years                                                    | 0.59                        | 0.50 - 0.68 | <.0001   | 0.57                                      | 0.48 - 0.66 | <.0001   |
| Ages ≥65 years (Ref.)                                               | 1.00                        |             |          | 1.00                                      |             |          |
| <b>Educational attainment</b>                                       |                             |             |          |                                           |             |          |
| Vocational college, junior college or more (versus lower education) | 1.32                        | 1.17 - 1.49 | <.0001   | 1.31                                      | 1.16 - 1.47 | <.0001   |
| <b>History of mental illness</b>                                    |                             |             |          |                                           |             |          |
| Yes (versus No)                                                     | 1.09                        | 0.87 - 1.37 | 0.436    |                                           |             |          |
| <b>Disaster-related factors</b>                                     |                             |             |          |                                           |             |          |
| <b>Living arrangement</b>                                           |                             |             |          |                                           |             |          |
| Evacuation shelter                                                  | 1.16                        | 0.66 - 2.04 | 0.613    | 1.20                                      | 0.68 - 2.12 | 0.537    |
| Temporary housing                                                   | 0.90                        | 0.74 - 1.10 | 0.314    | 0.95                                      | 0.78 - 1.16 | 0.614    |
| Rental house or apartment                                           | 1.09                        | 0.97 - 1.22 | 0.146    | 1.12                                      | 1.00 - 1.25 | 0.061    |
| Relative's home                                                     | 1.24                        | 0.91 - 1.68 | 0.180    | 1.20                                      | 0.88 - 1.63 | 0.256    |
| Own home (Ref.)                                                     | 1.00                        |             |          | 1.00                                      |             |          |
| <b>House damage</b>                                                 |                             |             |          |                                           |             |          |
| Yes (versus No)                                                     | 1.03                        | 0.89 - 1.19 | 0.705    |                                           |             |          |
| <b>Experience of disaster</b>                                       |                             |             |          |                                           |             |          |
| Having experienced a tsunami (Yes (versus No))                      | 0.97                        | 0.85 - 1.11 | 0.652    |                                           |             |          |
| <b>Psychosocial factors</b>                                         |                             |             |          |                                           |             |          |
| Change jobs (Yes (versus No))                                       | 0.94                        | 0.75 - 1.18 | 0.594    |                                           |             |          |
| Becoming unemployed (Yes (versus No))                               | 1.09                        | 0.96 - 1.23 | 0.171    |                                           |             |          |
| Decreased income (Yes (versus No))                                  | 0.85                        | 0.75 - 0.97 | 0.012    | 0.86                                      | 0.75 - 0.98 | 0.019    |
| Presence of traumatic symptoms (PCL-S) ≥44 (versus ≤43)             | 0.85                        | 0.74 - 0.97 | 0.016    | 0.89                                      | 0.76 - 1.05 | 0.160    |
| Presence of non-specific mental illness (K6) ≥13 (versus ≤12)       | 0.83                        | 0.71 - 0.97 | 0.022    | 0.89                                      | 0.74 - 1.07 | 0.209    |

1  
2  
3  
4  
5  
6  
7  
8  
9  
10  
11  
12  
13  
14  
15  
16  
17  
18  
19  
20  
21  
22  
23  
24  
25  
26  
27  
28  
29  
30  
31  
32  
33  
34  
35  
36  
37  
38  
39  
40  
41  
42  
43  
44  
45  
46  
47  
48  
49  
50  
51  
52  
53  
54  
55  
56  
57  
58  
59  
60

\*Age-adjusted

\*\*Sex-adjusted

#Adjusted for age and sex, educational attainment, living arrangement, decreased income, the presence of traumatic symptoms and the presence of non-specific mental illness except for the variable of interest.

For peer review only

## Discussion

A primary finding of the present study is that the proportion of smokers slightly decreased amongst men and women aged  $\geq 20$  years in the evacuation area from 23.9% to 22.3% at 10 to 20 months after the March 2011 earthquake and the subsequent disastrous tsunami and nuclear power plant accident. The proportion of participants who quit smoking was higher than the proportion of those who started smoking, which were 3.7% and 1.4% amongst men and 1.8% and 0.8% amongst women, respectively.

On the contrary, studies have reported that the proportion of current smokers increases after a disaster: from 34.4% to 52.5% amongst men and women one year after Hurricane Katrina<sup>8</sup> and from 22.6% to 23.4% amongst men and women aged  $\geq 18$  years 6 months after the terrorist attacks in Manhattan on 11 September 2001.<sup>9</sup>

In the present study, we found that factors associated with quitting smoking included being a female, older age, having a higher education and having a stable income. In contrast, factors associated with initiating smoking included being a male, younger age, having a lower education, staying in a rental house/apartment, experiencing damage to one's house, having experienced a tsunami, change jobs, the presence of traumatic symptoms and the presence of non-specific psychological distress. The findings of this study regarding traumatic symptoms and non-specific

1  
2  
3  
4  
5  
6 psychological distress were consistent with findings from previous studies on Hurricane  
7  
8 Katrina, the September 11 terrorist attacks and the Canterbury Great Earthquake; all  
9  
10 these studies revealed that PTSD was a major factor for initiating smoking.<sup>6,7,9</sup>  
11  
12  
13  
14 Therefore, the management of PTSD may help prevent individuals from initiating  
15  
16  
17 smoking.  
18  
19

20 The National Health Nutrition Survey in Japan reported that the proportion of  
21  
22 smokers in Japan before and after the disaster slightly increased from 19.5% (95% CI,  
23  
24 20.0 to 20.9%) in 2010 to 20.7% (95% CI, 18.6 to 20.3%) in 2012.<sup>25</sup> One reason for the  
25  
26 slight decrease in the proportion of current smokers in Fukushima after the disaster may  
27  
28 be the decreased access to tobacco products. The earthquake damaged tobacco  
29  
30 plantations, which ceased tobacco production and disrupted railway and road  
31  
32 transportation networks in the areas that were damaged by the earthquake. Tobacco  
33  
34 distribution stagnated after the disaster. According to a press release by Japan Tobacco  
35  
36 Inc., the total cigarette sales volume in April 2011 decreased by 81.8% compared with  
37  
38 April 2010, and domestic cigarette sales decreased by 74.8%. Furthermore, the cigarette  
39  
40 sales volume between April and September 2011 decreased by 41.2%, whereas the  
41  
42 tobacco sales volume decreased by 20.4% compared with the same period in the  
43  
44 previous year.<sup>26</sup> These situations likely contributed to participants quitting smoking after  
45  
46  
47  
48  
49  
50  
51  
52  
53  
54  
55  
56  
57  
58  
59  
60

1  
2  
3  
4  
5  
6 the disaster in Fukushima.  
7  
8  
9

10  
11 Even though the proportion of current smokers slightly decreased amongst the  
12 evacuees after the disaster, the proportion of current smokers was still higher in the  
13 evacuation area than in other areas of Japan. In the present study, the proportion of  
14 current smokers was 22.3% (35.2% men and 11.5% women), whereas the corresponding  
15 proportion in the national sample was 20.1% (32.4% men and 9.7% women) in 2012.<sup>27</sup>  
16  
17  
18  
19  
20  
21  
22  
23  
24

25 The strengths of this survey lie in its size and procedures because it involved a  
26 large-scale survey for completing an inventory-based analysis of evacuees following the  
27 earthquake.  
28  
29  
30  
31  
32  
33

34 This study has several limitations. First, we investigated smoking status before and  
35 after the earthquake using a self-reported questionnaire administered after the disaster  
36 that involved a cross-sectional study design; this may have led to recall bias. Second,  
37 we did not assess the number of cigarettes smoked amongst current smokers; thus, we  
38 could not examine dose–response relationships. Third, because the response rate in the  
39 present study was relatively low (41%), the representativeness of target populations was  
40 uncertain. Furthermore, if non-responders tended to be smokers or beginner smokers,  
41 the proportion of smokers after the disaster could be underestimated. Because smoking  
42  
43  
44  
45  
46  
47  
48  
49  
50  
51  
52  
53  
54  
55  
56  
57  
58  
59  
60



1  
2  
3  
4  
5  
6 status changes more frequently in the teenage years, psychosocial factors may influence  
7  
8 smoking status, particularly in teenagers. Unfortunately, the questions associated with  
9  
10 smoking status were limited to men and women 20 years of age and older in the present  
11  
12 study. Therefore, we did not evaluate an association between psychosocial factors and  
13  
14 smoking status amongst the participants aged <20 years. Lastly, no data were present  
15  
16 from non-disaster exposed areas for comparison, except for national data on the  
17  
18 prevalence of smoking.  
19  
20  
21  
22  
23  
24

25 In conclusion, the proportion of smokers slightly decreased amongst residents in  
26  
27 the evacuation area. The changes in smoking status were associated with disaster-related  
28  
29 psychosocial factors, particularly changes in living conditions, having experienced a  
30  
31 tsunami, switching jobs and developing PTSD. A long-term follow-up study is  
32  
33 warranted for examining the effects of disaster-related factors on smoking status  
34  
35 amongst evacuees.  
36  
37  
38  
39  
40  
41  
42  
43  
44  
45  
46  
47  
48  
49  
50  
51  
52  
53  
54  
55  
56  
57  
58  
59  
60

## Acknowledgements

The authors would like to express their sincere appreciation for the support extended to them by the chairpersons, expert committee members, advisors and staff of the Fukushima Health Management Survey Group.

## Contributors

HN, TO and HI contributed to the design of the present study. TO, SY, AO, MM, MH, NH, YS, HY and HT were responsible for data collection and overseeing the study procedures. The analysis was conducted by HN. The manuscript was written by HN. TO, SY, AO, MM, MH, NH, YS, HY, HT, MN, WZ, HI and KK made significant contributions to the critical interpretation of the results in terms of important practical content. All authors read and approved the final version of the manuscript.

## Competing interests

None declared.

## Patient consent

Not required.

## Funding

This survey was conducted as part of Fukushima Prefecture's post-disaster recovery plans and was supported by the 'National Health Fund for Children and Adults Affected by the Nuclear Incident'.

## Data sharing statement

No additional data are available.

## References

1. Yasumura S, Hosoya M, Yamashita S, et al. Study protocol for the Fukushima Health Management Survey. *J Epidemiol.* 2012;**22**:375–383.
2. Situation of the evacuation area and support for the victims in Fukushima. [Cited 2017 May]. Available from: <http://www.pref.fukushima.lg.jp/site/portal/list271.html>. (Accessed 31 May 2017)
3. Yabe H, Suzuki Y, Mashiko H, et al. Psychological distress after the Great East Japan Earthquake and Fukushima Daiichi Nuclear Power Plant accident: results of a mental health and lifestyle survey through the Fukushima Health Management Survey in FY2011 and FY2012. *Fukushima J Med Sci.* 2014;**60**:57–67.
4. Ansell EB, Gu P, Tuit K, et al. Effects of cumulative stress and impulsivity on smoking status. *Human Psychopharmacology.* 2012;**27**:200–208.
5. Vlahov D, Galea S, Resnick H, et al. Increased use of cigarettes, alcohol, and marijuana among Manhattan, New York, residents after the September 11th terrorist attacks. *Am J Epidemiol.* 2002;**155**:988–996.
6. Beaudoin CE. Hurricane Katrina: addictive behaviour trends and predictors. *Public Health Rep.* 2011;**126**:400–409.

- 1  
2  
3  
4  
5  
6 7. Flory K, Hankin BL, Kloos B, et al. Alcohol and cigarette use and misuse among  
7  
8 Hurricane Katrina survivors: psychosocial risk and protective factors. *Subst Use*  
9  
10  
11 Misuse. 2009;**44**:1711–1724.
- 12  
13  
14 8. Matthew N. Peters, John C. Moscona, Morgan J. Katz, et al. Natural disasters and  
15  
16 myocardial infarction : The six years after Hurricane Katrina. *Mayo Clin Proc.*  
17  
18 2014;**89**(4):472-477
- 19  
20  
21 9. Erskine N, Daley V, Stevenson S, et al. Smoking prevalence increases following  
22  
23 Canterbury earthquakes. *The Sci World J.* 2013,596957.
- 24  
25  
26 10. Naoi K, Local mental health activity after the Nligata-ken Chuetsu Earthquake:  
27  
28 Findings of investigations performed three and a half months and thirteen months after  
29  
30 the earthquake, and analysis about the risk factor of PTSD. *Jap Bull Soc Psychiatry*  
31  
32 2009;**18**:52–62.
- 33  
34  
35 11. Vlahov D, Galea S, Ahern J, et al. Increased use of cigarettes, alcohol, and  
36  
37 marijuana among Manhattan, New York, residents after the September 11th Terrorist  
38  
39 Attacks. *Am J Epidemiol.* 2002;**155**,988–966.
- 40  
41  
42 12. Ohira T, Hosoya M, Yasumura S, et al. Effect of evacuation on body weight after the  
43  
44 Great East Japan Earthquake. *Am J Prev Med.* 2016;**50**:553–560.
- 45  
46  
47  
48  
49  
50  
51  
52  
53  
54  
55  
56  
57  
58  
59  
60

- 1  
2  
3  
4  
5  
6 13. Satoh H, Ohira T, Nagai M, et al. Hypo- high-density lipoprotein cholesterolemia is  
7  
8 caused by evacuation after the Fukushima Daiichi Nuclear Power Plant accident:  
9  
10 Results from the Fukushima Health Management Survey. *Intern Med.* 2016;**55**:1967–  
11  
12 76.  
13  
14  
15  
16  
17 14. Sakai A, Ohira T, Hosoya M, et al. Life as an evacuee after the Fukushima Daiichi  
18  
19 nuclear power plant accident is a cause of polycythemia: the Fukushima Health  
20  
21 Management Survey. *BMC Public Health.* 2014;**14**:1318.  
22  
23  
24  
25  
26 15. Suzuki H, Ohira T, Takeishi Y, et al. Increased prevalence of atrial fibrillation after  
27  
28 the Great East Japan Earthquake: Results from the Fukushima Health Management  
29  
30 Survey. *Int J Cardiol.* 2015;**198**:102–105.  
31  
32  
33  
34 16. Iwasa H, Suzuki Y, Shiga T, et al. Psychometric Evaluation of the Japanese Version  
35  
36 of the Posttraumatic Stress Disorder Checklist in Community Dwellers Following the  
37  
38 Fukushima Daiichi Nuclear Power Plant Incident-The Fukushima Health Management  
39  
40 Survey. *SAGE Open* Jun 2016, 6 (2) 2158244016652444; DOI:  
41  
42 10.1177/2158244016652444  
43  
44  
45  
46  
47  
48 17. Suzuki Y, Yabe H, Horikoshi N, et al. Diagnostic accuracy of Japanese posttraumatic  
49  
50 stress measures after a complex disaster: The Fukushima Health Management Survey.  
51  
52  
53  
54 *Asia Pac Psychiatry.* 2016 Aug 9. doi: 10.1111/appy.12248.  
55  
56  
57  
58  
59  
60

- 1  
2  
3  
4  
5  
6 18. Furukawa TA, Kawakami N, Saitoh M, et al. The performance of the Japanese  
7  
8 version of the K6 and K10 in the World Mental Health Survey Japan. *Int J Methods*  
9  
10  
11 *Psychiatr Res* 2008;**17**:152–158.  
12  
13  
14 19. Kessler RC, Barker PR, Colpe LJ, et al. Screening for serious mental illness in the  
15  
16 general population. *Arch Gen Psychiatry* 2003;**60**:184–189.  
17  
18  
19 20. Kessler RC, Green JG, Gruber MJ, et al. Screening for serious mental illness in the  
20  
21 general population with the K6 screening scale: results from the WHO World Mental  
22  
23 *Health (WMH) survey initiative. Int J Methods Psychiatr Res* 2010;**19**:4–22.  
24  
25  
26  
27  
28 21. Blanchard EB, Jones-Alexander J, Buckley TC, et al. Psychometric properties of the  
29  
30 PTSD Checklist (PCL). *Behaviour Research and Therapy*, 1996;**34**:669–673. doi:  
31  
32 10.1016/0005-7967(96)00033-2  
33  
34  
35  
36 22. Ronald CK, Sandro G, Russell TJ, et al. Mental illness and suicidality after  
37  
38 Hurricane Katrina. *Bull World Health Organ* 2006;**84**:930–939.  
39  
40  
41  
42 23. Galea S, Brewin CR, Gruber M, et al. Exposure to hurricane-related stressors and  
43  
44 mental illness after Hurricane Katrina. *Arch Gen Psychiatry* 2007;**64**:1427–1434.  
45  
46  
47  
48 24. Parslow RA, Jorm AF. Tobacco use after experiencing a major natural disaster:  
49  
50 analysis of a longitudinal study of 2063 young adults. *Addiction*. 2006;**101**:1044–1050.  
51  
52  
53  
54  
55  
56  
57  
58  
59  
60

1  
2  
3  
4  
5  
6 25. Cancer Registry and Statistics. Cancer Information Service, National Cancer Center,

7  
8 Japan, Pref\_Smoking\_Rate (2001-2013). Available from:

9  
10  
11 [http://ganjoho.jp/data/reg\\_stat/statistics/dl/Pref\\_Smoking\\_Rate \(2001\\_2013\).xls](http://ganjoho.jp/data/reg_stat/statistics/dl/Pref_Smoking_Rate(2001_2013).xls).

12  
13  
14 (Accessed 5 May 2017)

15  
16  
17 26. JAPAN TOBACCO INC(JTI),2011. Japanese Domestic Cigarette Sales Results for

18  
19 April 2011 (Preliminary Report) 2011 [cited 2015 June 11]. Available from:

20  
21  
22 [http://www.jt.com/investors/media/press\\_releases/2011/pdf/20110512\\_12.pdf](http://www.jt.com/investors/media/press_releases/2011/pdf/20110512_12.pdf).

23  
24  
25 (Accessed 5 Jun 2015)

26  
27  
28 27. Ministry of Health Labour and Welfare, 2012. Summarize the results of National

29  
30 Health Nutrition Survey. 2012. [cited 2015 December 1]. Available from:

31  
32  
33 <http://www.mhlw.go.jp/file/04-Houdouhappyou-10904750-Kenkoukyoku->

34  
35  
36 Gantaisakukenkouzoushinka/0000099296.pdf. (Accessed 5 Jun 2016)

1  
2  
3  
4  
5  
6 **List of Figures**  
7

8  
9 **Figure 1 Flow chart for determining smoking status**  
10  
11  
12  
13  
14  
15  
16  
17  
18  
19  
20  
21  
22  
23  
24  
25  
26  
27  
28  
29  
30  
31  
32  
33  
34  
35  
36  
37  
38  
39  
40  
41  
42  
43  
44  
45  
46  
47  
48  
49  
50  
51  
52  
53  
54  
55  
56  
57  
58  
59  
60

For peer review only



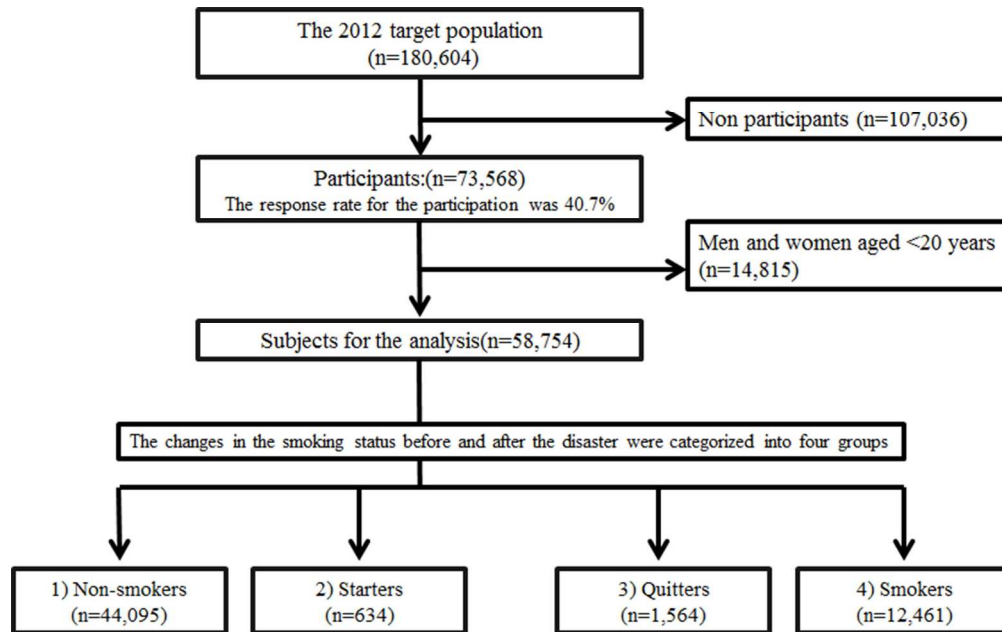

Figure 1 Flow chart for determining smoking status

289x182mm (300 x 300 DPI)

**Supplement Table 1.** Multivariable-adjusted prevalence ratios (PRs) and 95% confidence intervals (CIs) of starting smoking after the disaster according to demographic, disaster-related and psychosocial factors among 44,729 non-smokers before the disaster.

| Model                                                                      | Men     |             |          | Women   |             |          |
|----------------------------------------------------------------------------|---------|-------------|----------|---------|-------------|----------|
|                                                                            | PR      | (95%CI)     | P values | PR      | (95%CI)     | P values |
| n=44729                                                                    | n=16727 |             |          | n=28002 |             |          |
| <b>Demographic characteristics</b>                                         |         |             |          |         |             |          |
| Men(versus women) <sup>*</sup>                                             |         |             |          |         |             |          |
| <b>Age group<sup>**</sup></b>                                              |         |             |          |         |             |          |
| 20–49 years                                                                | 5.73    | 4.26 - 7.70 | <.0001   | 4.81    | 3.29 - 7.01 | <.0001   |
| 50–64 years                                                                | 2.02    | 1.47 - 2.77 | <.0001   | 1.39    | 0.90 - 2.13 | 0.135    |
| ≥65 years (Ref.)                                                           | 1.00    |             |          | 1.00    |             |          |
| <b>Educational attainment</b>                                              |         |             |          |         |             |          |
| <b>Vocational college, junior college or more (versus lower education)</b> | 0.68    | 0.53 - 0.87 | 0.002    | 0.71    | 0.54 - 0.95 | 0.020    |
| <b>History of mental illness</b>                                           |         |             |          |         |             |          |
| Yes(versus No)                                                             | 1.24    | 0.82 - 1.86 | 0.304    | 1.79    | 1.20 - 2.66 | 0.005    |
| <b>Disaster-related factors</b>                                            |         |             |          |         |             |          |
| <b>Living arrangement</b>                                                  |         |             |          |         |             |          |
| Evacuation shelter                                                         | 1.22    | 0.49 - 3.05 | 0.671    | 1.59    | 0.50 - 5.12 | 0.436    |
| Temporary housing                                                          | 0.96    | 0.65 - 1.43 | 0.840    | 1.57    | 1.03 - 1.03 | 0.034    |
| Rental house or apartment                                                  | 1.25    | 1.00 - 1.57 | 0.056    | 1.34    | 1.02 - 1.76 | 0.039    |
| Relative's home                                                            | 1.11    | 0.61 - 2.03 | 0.725    | 1.12    | 0.56 - 2.23 | 0.745    |
| Own home (Ref.)                                                            | 1.00    |             |          | 1.00    |             |          |
| <b>House damage</b>                                                        |         |             |          |         |             |          |
| Yes(versus No)                                                             | 1.44    | 1.11 - 1.86 | 0.006    | 0.99    | 0.70 - 1.39 | 0.953    |
| <b>Experience of disaster</b>                                              |         |             |          |         |             |          |
| Having experienced a tsunami                                               |         |             |          |         |             |          |
| Yes(versus No)                                                             | 1.44    | 1.14 - 1.81 | 0.002    | 1.05    | 0.76 - 1.46 | 0.756    |
| <b>Psychosocial factors</b>                                                |         |             |          |         |             |          |
| Change jobs                                                                |         |             |          |         |             |          |
| Yes(versus No)                                                             | 1.70    | 1.19 - 2.44 | 0.004    | 1.02    | 0.60 - 1.74 | 0.936    |
| Becoming unemployed                                                        |         |             |          |         |             |          |
| Yes(versus No)                                                             | 0.99    | 0.76 - 1.29 | 0.922    | 1.47    | 1.13 - 1.92 | 0.004    |
| Decreased Income                                                           |         |             |          |         |             |          |
| Yes(versus No)                                                             | 1.05    | 0.83 - 1.34 | 0.694    | 0.93    | 0.67 - 1.31 | 0.692    |
| Presence of traumatic symptoms(PCL-S)                                      |         |             |          |         |             |          |
| ≥44(versus ≤43)                                                            | 1.30    | 0.96 - 1.75 | 0.090    | 2.31    | 1.68 - 3.18 | <.0001   |
| Presence of non-specific mental illness(K6)                                |         |             |          |         |             |          |
| ≥13(versus ≤12)                                                            | 1.75    | 1.28 - 2.39 | 0.001    | 1.00    | 0.70 - 1.42 | 0.995    |

<sup>#</sup>Adjusted for age, and educational attainment, history of mental illness, living arrangement, house damage, having experienced a tsunami, change jobs, becoming unemployed, decreased Income, the presence of traumatic symptoms and the presence of non-specific mental illness except for the variable of interest.

**Supplemental Table 2.** Multivariable-adjusted prevalence ratios (PRs) and 95% confidence intervals (CIs) of quitting smoking after the disaster according to demographic, disaster-related and psychosocial factors among 14,025 smokers before the disaster.

| Model                                                               | Men     |             |          | Women  |             |          |
|---------------------------------------------------------------------|---------|-------------|----------|--------|-------------|----------|
|                                                                     | PR      | (95%CI)     | P values | PR     | (95%CI)     | P values |
| n=14025                                                             | n=10037 |             |          | n=3998 |             |          |
| <b>Demographic characteristics</b>                                  |         |             |          |        |             |          |
| Men(versus women)*                                                  |         |             |          |        |             |          |
| <b>Age group**</b>                                                  |         |             |          |        |             |          |
| 20–49 years                                                         | 0.43    | 0.36 - 0.51 | <.0001   | 0.92   | 0.65 - 1.30 | 0.620    |
| 50–64 years                                                         | 0.59    | 0.50 - 0.71 | <.0001   | 0.58   | 0.40 - 0.86 | 0.007    |
| ≥65 years (Ref.)                                                    | 1.00    |             |          | 1.00   |             |          |
| <b>Educational attainment</b>                                       |         |             |          |        |             |          |
| Vocational college, junior college or more (versus lower education) | 1.33    | 1.14 - 1.55 | <.001    | 1.34   | 1.10 - 1.63 | 0.003    |
| <b>History of mental illness</b>                                    |         |             |          |        |             |          |
| Yes(versus No)                                                      |         |             |          |        |             |          |
| <b>Disaster-related factors</b>                                     |         |             |          |        |             |          |
| <b>Living arrangement</b>                                           |         |             |          |        |             |          |
| Evacuation shelter                                                  | 1.15    | 0.59 - 2.25 | 0.675    | 1.42   | 0.48 - 4.24 | 0.529    |
| Temporary housing                                                   | 1.05    | 0.83 - 1.33 | 0.684    | 0.73   | 0.50 - 1.07 | 0.111    |
| Rental house or apartment                                           | 1.11    | 0.96 - 1.29 | 0.152    | 1.12   | 0.92 - 1.35 | 0.251    |
| Relative's home                                                     | 1.21    | 0.83 - 1.77 | 0.329    | 1.19   | 0.70 - 2.05 | 0.522    |
| Own home (Ref.)                                                     | 1.00    |             |          | 1.00   |             |          |
| <b>House damage</b>                                                 |         |             |          |        |             |          |
| Yes(versus No)                                                      |         |             |          |        |             |          |
| <b>Experience of disaster</b>                                       |         |             |          |        |             |          |
| Having experienced a tsunami                                        |         |             |          |        |             |          |
| Yes(versus No)                                                      |         |             |          |        |             |          |
| <b>Psychosocial factors</b>                                         |         |             |          |        |             |          |
| Change jobs                                                         |         |             |          |        |             |          |
| Yes(versus No)                                                      |         |             |          |        |             |          |
| Becoming unemployed                                                 |         |             |          |        |             |          |
| Yes(versus No)                                                      |         |             |          |        |             |          |
| Decreased Income                                                    |         |             |          |        |             |          |
| Yes(versus No)                                                      | 0.85    | 0.72 - 0.99 | 0.038    | 0.94   | 0.74 - 1.18 | 0.573    |
| Presence of traumatic symptoms(PCL-S)                               |         |             |          |        |             |          |
| ≥44(versus ≤43)                                                     | 0.98    | 0.79 - 1.20 | 0.811    | 0.75   | 0.58 - 0.98 | 0.031    |
| Presence of non-specific mental illness(K6)                         |         |             |          |        |             |          |
| ≥13(versus ≤12)                                                     | 1.01    | 0.80 - 1.28 | 0.947    | 0.79   | 0.59 - 1.07 | 0.129    |

\*Adjusted for age, and educational attainment, living arrangement, decreased Income, the presence of traumatic symptoms and the presence of non-specific mental illness except for the variable of interest.

## STROBE Statement—checklist of items that should be included in reports of observational studies

|                                    | Item No | Recommendation                                                                                                                                                                                                                                                                                                                                                                                                                                                                                                                                                                                                                                                                                   |
|------------------------------------|---------|--------------------------------------------------------------------------------------------------------------------------------------------------------------------------------------------------------------------------------------------------------------------------------------------------------------------------------------------------------------------------------------------------------------------------------------------------------------------------------------------------------------------------------------------------------------------------------------------------------------------------------------------------------------------------------------------------|
| <b>Title and abstract (P1-6)</b>   | 1       | (a) Indicate the study's design with a commonly used term in the title or the abstract<br>(b) Provide in the abstract an informative and balanced summary of what was done and what was found                                                                                                                                                                                                                                                                                                                                                                                                                                                                                                    |
| <b>Introduction (P7-8)</b>         |         |                                                                                                                                                                                                                                                                                                                                                                                                                                                                                                                                                                                                                                                                                                  |
| Background/rationale (P7)          | 2       | Explain the scientific background and rationale for the investigation being reported                                                                                                                                                                                                                                                                                                                                                                                                                                                                                                                                                                                                             |
| Objectives (P8)                    | 3       | State specific objectives, including any prespecified hypotheses                                                                                                                                                                                                                                                                                                                                                                                                                                                                                                                                                                                                                                 |
| <b>Methods (P8-13)</b>             |         |                                                                                                                                                                                                                                                                                                                                                                                                                                                                                                                                                                                                                                                                                                  |
| Study design (P8)                  | 4       | Present key elements of study design early in the paper                                                                                                                                                                                                                                                                                                                                                                                                                                                                                                                                                                                                                                          |
| Setting (P8)                       | 5       | Describe the setting, locations, and relevant dates, including periods of recruitment, exposure, follow-up, and data collection                                                                                                                                                                                                                                                                                                                                                                                                                                                                                                                                                                  |
| Participants (P8-9)                | 6       | (a) <i>Cohort study</i> —Give the eligibility criteria, and the sources and methods of selection of participants. Describe methods of follow-up<br><i>Case-control study</i> —Give the eligibility criteria, and the sources and methods of case ascertainment and control selection. Give the rationale for the choice of cases and controls<br><i>Cross-sectional study</i> —Give the eligibility criteria, and the sources and methods of selection of participants<br>(b) <i>Cohort study</i> —For matched studies, give matching criteria and number of exposed and unexposed<br><i>Case-control study</i> —For matched studies, give matching criteria and the number of controls per case |
| Variables (P10-P11)                | 7       | Clearly define all outcomes, exposures, predictors, potential confounders, and effect modifiers. Give diagnostic criteria, if applicable                                                                                                                                                                                                                                                                                                                                                                                                                                                                                                                                                         |
| Data sources/ measurement (P8-P11) | 8*      | For each variable of interest, give sources of data and details of methods of assessment (measurement). Describe comparability of assessment methods if there is more than one group                                                                                                                                                                                                                                                                                                                                                                                                                                                                                                             |
| Bias (P19)                         | 9       | Describe any efforts to address potential sources of bias                                                                                                                                                                                                                                                                                                                                                                                                                                                                                                                                                                                                                                        |
| Study size (P8-9)                  | 10      | Explain how the study size was arrived at                                                                                                                                                                                                                                                                                                                                                                                                                                                                                                                                                                                                                                                        |
| Quantitative variables (P10-11)    | 11      | Explain how quantitative variables were handled in the analyses. If applicable, describe which groupings were chosen and why                                                                                                                                                                                                                                                                                                                                                                                                                                                                                                                                                                     |
| Statistical methods (P12-13)       | 12      | (a) Describe all statistical methods, including those used to control for confounding<br>(b) Describe any methods used to examine subgroups and interactions<br>(c) Explain how missing data were addressed<br>(d) <i>Cohort study</i> —If applicable, explain how loss to follow-up was addressed<br><i>Case-control study</i> —If applicable, explain how matching of cases and controls was addressed<br><i>Cross-sectional study</i> —If applicable, describe analytical methods taking account of sampling strategy<br>(e) Describe any sensitivity analyses                                                                                                                                |

Continued on next page

1  
2  
3  
4  
5  
6  
7  
8  
9  
10  
11  
12  
13  
14  
15  
16  
17  
18  
19  
20  
21  
22  
23  
24  
25  
26  
27  
28  
29  
30  
31  
32  
33  
34  
35  
36  
37  
38  
39  
40  
41  
42  
43  
44  
45  
46  
47  
48  
49  
50  
51  
52  
53  
54  
55  
56  
57  
58  
59  
60**Results (P13-25)**

|                           |     |                                                                                                                                                                                                                                                                                                                                                                                                               |
|---------------------------|-----|---------------------------------------------------------------------------------------------------------------------------------------------------------------------------------------------------------------------------------------------------------------------------------------------------------------------------------------------------------------------------------------------------------------|
| Participants (P13)        | 13* | (a) Report numbers of individuals at each stage of study—eg numbers potentially eligible, examined for eligibility, confirmed eligible, included in the study, completing follow-up, and analysed<br>(b) Give reasons for non-participation at each stage<br>(c) Consider use of a flow diagram                                                                                                               |
| Descriptive data (P13-18) | 14* | (a) Give characteristics of study participants (eg demographic, clinical, social) and information on exposures and potential confounders<br>(b) Indicate number of participants with missing data for each variable of interest<br>(c) <i>Cohort study</i> —Summarise follow-up time (eg, average and total amount)                                                                                           |
| Outcome data (P19-25)     | 15* | <i>Cohort study</i> —Report numbers of outcome events or summary measures over time<br><i>Case-control study</i> —Report numbers in each exposure category, or summary measures of exposure<br><i>Cross-sectional study</i> —Report numbers of outcome events or summary measures                                                                                                                             |
| Main results (P14-16)     | 16  | (a) Give unadjusted estimates and, if applicable, confounder-adjusted estimates and their precision (eg, 95% confidence interval). Make clear which confounders were adjusted for and why they were included<br>(b) Report category boundaries when continuous variables were categorized<br>(c) If relevant, consider translating estimates of relative risk into absolute risk for a meaningful time period |
| Other analyses<br>None    | 17  | Report other analyses done—eg analyses of subgroups and interactions, and sensitivity analyses                                                                                                                                                                                                                                                                                                                |

**Discussion (P25-29)**

|                         |    |                                                                                                                                                                            |
|-------------------------|----|----------------------------------------------------------------------------------------------------------------------------------------------------------------------------|
| Key results (P26-28)    | 18 | Summarise key results with reference to study objectives                                                                                                                   |
| Limitations (P28-29)    | 19 | Discuss limitations of the study, taking into account sources of potential bias or imprecision. Discuss both direction and magnitude of any potential bias                 |
| Interpretation (P29)    | 20 | Give a cautious overall interpretation of results considering objectives, limitations, multiplicity of analyses, results from similar studies, and other relevant evidence |
| Generalisability<br>P29 | 21 | Discuss the generalisability (external validity) of the study results                                                                                                      |

**Other information (P30-30)**

|               |    |                                                                                                                                                               |
|---------------|----|---------------------------------------------------------------------------------------------------------------------------------------------------------------|
| Funding (P30) | 22 | Give the source of funding and the role of the funders for the present study and, if applicable, for the original study on which the present article is based |
|---------------|----|---------------------------------------------------------------------------------------------------------------------------------------------------------------|

\*Give information separately for cases and controls in case-control studies and, if applicable, for exposed and unexposed groups in cohort and cross-sectional studies.

**Note:** An Explanation and Elaboration article discusses each checklist item and gives methodological background and published examples of transparent reporting. The STROBE checklist is best used in conjunction with this article (freely available on the Web sites of PLoS Medicine at <http://www.plosmedicine.org/>, Annals of Internal Medicine at <http://www.annals.org/>, and Epidemiology at <http://www.epidem.com/>). Information on the STROBE Initiative is available at [www.strobe-statement.org](http://www.strobe-statement.org).
