# Supplementary material for: Associations of disaster-related and psychosocial factors with changes in smoking status after a disaster: a cross-sectional survey after the Great East Japan Earthquake
Source: PubMed Central journal article supplement — BMJ Open. 2018 Jun 30;8(6):e018943. doi: 10.1136/bmjopen-2017-018943 (PMC6135429; doi:10.1136/bmjopen-2017-018943), 2018-06-30
Supplement: bmjopen-2017-018943supp001.pdf [file bmjopen-2017-018943supp001.pdf]

**Supplement Table 1.** Multivariable-adjusted prevalence ratios (PRs) and 95% confidence intervals (CIs) of starting smoking after the disaster according to demographic, disaster-related and psychosocial factors among 44,729 non-smokers before the disaster.

| Model                                                                      | Men     |             |          | Women   |             |          |
|----------------------------------------------------------------------------|---------|-------------|----------|---------|-------------|----------|
|                                                                            | PR      | (95%CI)     | P values | PR      | (95%CI)     | P values |
| n=44729                                                                    | n=16727 |             |          | n=28002 |             |          |
| <b>Demographic characteristics</b>                                         |         |             |          |         |             |          |
| Men(versus women) <sup>*</sup>                                             |         |             |          |         |             |          |
| <b>Age group<sup>**</sup></b>                                              |         |             |          |         |             |          |
| 20–49 years                                                                | 5.73    | 4.26 - 7.70 | <.0001   | 4.81    | 3.29 - 7.01 | <.0001   |
| 50–64 years                                                                | 2.02    | 1.47 - 2.77 | <.0001   | 1.39    | 0.90 - 2.13 | 0.135    |
| ≥65 years (Ref.)                                                           | 1.00    |             |          | 1.00    |             |          |
| <b>Educational attainment</b>                                              |         |             |          |         |             |          |
| <b>Vocational college, junior college or more (versus lower education)</b> | 0.68    | 0.53 - 0.87 | 0.002    | 0.71    | 0.54 - 0.95 | 0.020    |
| <b>History of mental illness</b>                                           |         |             |          |         |             |          |
| Yes(versus No)                                                             | 1.24    | 0.82 - 1.86 | 0.304    | 1.79    | 1.20 - 2.66 | 0.005    |
| <b>Disaster-related factors</b>                                            |         |             |          |         |             |          |
| <b>Living arrangement</b>                                                  |         |             |          |         |             |          |
| Evacuation shelter                                                         | 1.22    | 0.49 - 3.05 | 0.671    | 1.59    | 0.50 - 5.12 | 0.436    |
| Temporary housing                                                          | 0.96    | 0.65 - 1.43 | 0.840    | 1.57    | 1.03 - 1.03 | 0.034    |
| Rental house or apartment                                                  | 1.25    | 1.00 - 1.57 | 0.056    | 1.34    | 1.02 - 1.76 | 0.039    |
| Relative's home                                                            | 1.11    | 0.61 - 2.03 | 0.725    | 1.12    | 0.56 - 2.23 | 0.745    |
| Own home (Ref.)                                                            | 1.00    |             |          | 1.00    |             |          |
| <b>House damage</b>                                                        |         |             |          |         |             |          |
| Yes(versus No)                                                             | 1.44    | 1.11 - 1.86 | 0.006    | 0.99    | 0.70 - 1.39 | 0.953    |
| <b>Experience of disaster</b>                                              |         |             |          |         |             |          |
| Having experienced a tsunami                                               |         |             |          |         |             |          |
| Yes(versus No)                                                             | 1.44    | 1.14 - 1.81 | 0.002    | 1.05    | 0.76 - 1.46 | 0.756    |
| <b>Psychosocial factors</b>                                                |         |             |          |         |             |          |
| Change jobs                                                                |         |             |          |         |             |          |
| Yes(versus No)                                                             | 1.70    | 1.19 - 2.44 | 0.004    | 1.02    | 0.60 - 1.74 | 0.936    |
| Becoming unemployed                                                        |         |             |          |         |             |          |
| Yes(versus No)                                                             | 0.99    | 0.76 - 1.29 | 0.922    | 1.47    | 1.13 - 1.92 | 0.004    |
| Decreased Income                                                           |         |             |          |         |             |          |
| Yes(versus No)                                                             | 1.05    | 0.83 - 1.34 | 0.694    | 0.93    | 0.67 - 1.31 | 0.692    |
| Presence of traumatic symptoms(PCL-S)                                      |         |             |          |         |             |          |
| ≥44(versus ≤43)                                                            | 1.30    | 0.96 - 1.75 | 0.090    | 2.31    | 1.68 - 3.18 | <.0001   |
| Presence of non-specific mental illness(K6)                                |         |             |          |         |             |          |
| ≥13(versus ≤12)                                                            | 1.75    | 1.28 - 2.39 | 0.001    | 1.00    | 0.70 - 1.42 | 0.995    |

<sup>#</sup>Adjusted for age, and educational attainment, history of mental illness, living arrangement, house damage, having experienced a tsunami, change jobs, becoming unemployed, decreased Income, the presence of traumatic symptoms and the presence of non-specific mental illness except for the variable of interest.

**Supplemental Table 2.** Multivariable-adjusted prevalence ratios (PRs) and 95% confidence intervals (CIs) of quitting smoking after the disaster according to demographic, disaster-related and psychosocial factors among 14,025 smokers before the disaster.

| Model                                                                      | Men     |             |          | Women  |             |          |
|----------------------------------------------------------------------------|---------|-------------|----------|--------|-------------|----------|
|                                                                            | PR      | (95%CI)     | P values | PR     | (95%CI)     | P values |
| n=14025                                                                    | n=10037 |             |          | n=3998 |             |          |
| <b>Demographic characteristics</b>                                         |         |             |          |        |             |          |
| Men(versus women) <sup>*</sup>                                             |         |             |          |        |             |          |
| <b>Age group<sup>**</sup></b>                                              |         |             |          |        |             |          |
| 20–49 years                                                                | 0.43    | 0.36 - 0.51 | <.0001   | 0.92   | 0.65 - 1.30 | 0.620    |
| 50–64 years                                                                | 0.59    | 0.50 - 0.71 | <.0001   | 0.58   | 0.40 - 0.86 | 0.007    |
| ≥65 years (Ref.)                                                           | 1.00    |             |          | 1.00   |             |          |
| <b>Educational attainment</b>                                              |         |             |          |        |             |          |
| <b>Vocational college, junior college or more (versus lower education)</b> | 1.33    | 1.14 - 1.55 | <.001    | 1.34   | 1.10 - 1.63 | 0.003    |
| <b>History of mental illness</b>                                           |         |             |          |        |             |          |
| Yes(versus No)                                                             |         |             |          |        |             |          |
| <b>Disaster-related factors</b>                                            |         |             |          |        |             |          |
| <b>Living arrangement</b>                                                  |         |             |          |        |             |          |
| Evacuation shelter                                                         | 1.15    | 0.59 - 2.25 | 0.675    | 1.42   | 0.48 - 4.24 | 0.529    |
| Temporary housing                                                          | 1.05    | 0.83 - 1.33 | 0.684    | 0.73   | 0.50 - 1.07 | 0.111    |
| Rental house or apartment                                                  | 1.11    | 0.96 - 1.29 | 0.152    | 1.12   | 0.92 - 1.35 | 0.251    |
| Relative's home                                                            | 1.21    | 0.83 - 1.77 | 0.329    | 1.19   | 0.70 - 2.05 | 0.522    |
| Own home (Ref.)                                                            | 1.00    |             |          | 1.00   |             |          |
| <b>House damage</b>                                                        |         |             |          |        |             |          |
| Yes(versus No)                                                             |         |             |          |        |             |          |
| <b>Experience of disaster</b>                                              |         |             |          |        |             |          |
| Having experienced a tsunami                                               |         |             |          |        |             |          |
| Yes(versus No)                                                             |         |             |          |        |             |          |
| <b>Psychosocial factors</b>                                                |         |             |          |        |             |          |
| Change jobs                                                                |         |             |          |        |             |          |
| Yes(versus No)                                                             |         |             |          |        |             |          |
| Becoming unemployed                                                        |         |             |          |        |             |          |
| Yes(versus No)                                                             |         |             |          |        |             |          |
| Decreased Income                                                           | 0.85    | 0.72 - 0.99 | 0.038    | 0.94   | 0.74 - 1.18 | 0.573    |
| Yes(versus No)                                                             |         |             |          |        |             |          |
| Presence of traumatic symptoms(PCL-S)                                      | 0.98    | 0.79 - 1.20 | 0.811    | 0.75   | 0.58 - 0.98 | 0.031    |
| ≥44(versus ≤43)                                                            |         |             |          |        |             |          |
| Presence of non-specific mental illness(K6)                                | 1.01    | 0.80 - 1.28 | 0.947    | 0.79   | 0.59 - 1.07 | 0.129    |
| ≥13(versus ≤12)                                                            |         |             |          |        |             |          |

<sup>#</sup>Adjusted for age, and educational attainment, living arrangement, decreased Income, the presence of traumatic symptoms and the presence of non-specific mental illness except for the variable of interest.
